# 1 Main Manuscript for

## 2 3 **Climate, demography, immunology, and virology combine to drive two decades of** 4 **dengue virus dynamics in Cambodia**

5  
6 Cara E. Brook<sup>1\*</sup>, Carly Rozins<sup>2</sup>, Jennifer A. Bohl<sup>3</sup>, Vida Ahyong<sup>4</sup>, Sophana Chea<sup>5</sup>, Liz  
7 Fahsbender<sup>6</sup>, Rekol Huy<sup>7</sup>, Sreyngim Lay<sup>5</sup>, Rithea Leang<sup>7</sup>, Yimei Li<sup>1</sup>, Chanthap Lon<sup>5</sup>, Somnang  
8 Man<sup>5,7</sup>, Mengheng Oum<sup>5</sup>, Graham R. Northrup<sup>8</sup>, Fabiano Oliveira<sup>3</sup>, Andrea R. Pacheco<sup>5</sup>, Daniel  
9 M. Parker<sup>9,10</sup>, Katherine Young<sup>11</sup>, Michael Boots<sup>12</sup>, Cristina M. Tato<sup>4</sup>, Joseph L. DeRisi<sup>4</sup>, Christina  
10 Yek<sup>3</sup>, Jessica E. Manning<sup>3,5</sup>

### 11 12 **Affiliations:**

13 <sup>1</sup> Department of Ecology and Evolution, University of Chicago, Chicago, Illinois, USA

14 <sup>2</sup> Department of Science and Technology Studies, York University, Toronto, Canada

15 <sup>3</sup> Laboratory of Malaria and Vector Research, National Institute of Allergy and Infectious  
16 Diseases, National Institutes of Health, Rockville, Maryland, USA

17 <sup>4</sup> Chan Zuckerberg Biohub, San Francisco, California, USA

18 <sup>5</sup> International Center of Excellence in Research, National Institute of Allergy and Infectious  
19 Diseases, National Institutes of Health, Phnom Penh, Cambodia

20 <sup>6</sup> Chan Zuckerberg Initiative, San Francisco, California, USA

21 <sup>7</sup> National Center for Parasitology, Entomology, and Malaria Control, Phnom Penh, Cambodia

22 <sup>8</sup> Center for Computational Biology, University of California, Berkeley, California, USA

23 <sup>9</sup> Department of Population Health and Disease Prevention, University of California, Irvine,  
24 California, USA

25 <sup>10</sup> Department of Epidemiology and Biostatistics, University of California, Irvine, California, USA

26 <sup>11</sup> Department of Biological Sciences, University of Texas, El Paso, Texas, USA

27 <sup>12</sup> Department of Integrative Biology, University of California, Berkeley, California, USA

28  
29 \*Corresponding author: Cara E. Brook

30 **Email:** cbrook@uchicago.edu

31  
32 **Author Contributions:** CEB and JEM conceived the study. JEM, JAB, HR, RL, and SC carried  
33 out the febrile surveillance study and collected samples for mNGS in 2019. VA, CMT, JLD, JAB,  
34 SC, SL, CY, OM, SM, and JEM carried out RT-qPCR to identify dengue-positive samples, as well  
35 as library preparation and mNGS for raw sequencing. Other ancillary demographic data collection  
36 and analyses were performed by RL, KS, CY, FO, and ARP. DP, CL, and JEM set up geospatial  
37 system for patients. CEB and JAB generated consensus dengue genomes for upload to NCBI.  
38 KY and CEB downloaded climate data. CEB carried out TSIR, FOI, and simulation modeling, as  
39 well as all phylogenetic analyses, with help from YL, GN, CR, and MB. CR and CEB extended the  
40 catalytic model to include waning multitypic immunity. CEB and JEM wrote the first draft of the  
41 manuscript. All authors approved and contributed to subsequent drafts of the manuscript and  
42 agree with the results presented.

43  
44 **Competing Interest Statement:** No competing interests.

45 **Classification:** Biological Sciences / Genetics

46 **Keywords:** dengue, genomic epidemiology, force of infection, wavelet decomposition, arbovirus

47

48 **This PDF file includes:**

49 Main Text

50 Figures 1 to 5

51

52 **ABSTRACT**

53

54 The incidence of dengue virus disease has increased globally across the past half-century, with  
55 highest number of cases ever reported in 2019. We analyzed climatological, epidemiological, and  
56 phylogenomic data to investigate drivers of two decades of dengue virus disease in Cambodia,  
57 an understudied endemic setting. Using epidemiological models fit to a 19-year dataset, we first  
58 demonstrate that climate-driven transmission alone is insufficient to explain three epidemics  
59 across the time series. We then use wavelet decomposition to highlight enhanced annual and  
60 multiannual synchronicity in dengue cycles between provinces in epidemic years, suggesting a  
61 role for climate in homogenizing dynamics across space and time. Assuming reported cases  
62 correspond to symptomatic secondary infections, we next use an age-structured catalytic model  
63 to capture a trend of declining force of dengue infection through time, which drives observed  
64 patterns of increasing mean age of reported cases in Cambodia. Reported cases in >70 year-old  
65 individuals in epidemic years are best explained when additionally allowing for waning multitypic  
66 immunity and repeat symptomatic infections in older cohorts. We support this work with time-  
67 resolved phylogenetic trees incorporating 122 dengue virus (DENV) genomes sequenced in the  
68 2019-2020 epidemic, which document introduction of DENV-2 Cosmopolitan genotype into  
69 Cambodia, yielding localized transmission and decreased genomic diversity compared to  
70 endemic DENV-1. Finally, we simulate an age-structured, mechanistic model of dengue dynamics  
71 to demonstrate how introduction of a genetically distinct lineage into a population with waning  
72 multitypic immunity could drive repeat infections within a serotype in older-age individuals and  
73 recover patterns from reported data.

74

75 **CLINICAL TRIAL NUMBERS:** NCT04034264 and NCT03534245.

76

77 **SIGNIFICANCE STATEMENT**

78 The year 2019 witnessed the highest number of dengue cases ever reported, including in  
79 Cambodia, a Southeast Asian country with endemic transmission. We analyzed two decades of  
80 national dengue surveillance data for Cambodia to demonstrate how increasing temperature and  
81 precipitation enhance spatiotemporal synchronicity in epidemic years. We document how twenty  
82 years of demographic transition has increased the age of reported dengue infection and  
83 correspondingly depressed the force of infection through time. We show that introduction of a  
84 divergent DENV-2 genotype in Cambodia in 2019 likely drove repeated symptomatic infections in  
85 older-age individuals that contributed to a high burden epidemic. As climates warm, we are likely  
86 to see more synchronized dynamics globally and a shifting burden of symptomatic disease into  
87 older cohorts.

88

89

90 **MAIN TEXT**

91

92 **INTRODUCTION**

93 Dengue virus (DENV) transmission has increased dramatically over the past two  
94 decades, culminating in the year 2019 with the highest number of global cases ever reported  
95 (>5.2 million) to the World Health Organization (WHO) (1). Since nearly three-quarters of DENV  
96 infections are estimated to be clinically inapparent (thereby unreported), these counts represent a  
97 vast underestimate of the true scale of dengue burden on public health systems (2). DENV is a  
98 flavivirus primarily transmitted by the *Aedes aegypti* mosquito, an ubiquitous arthropod vector in  
99 tropical and subtropical regions (2). DENV is comprised of four antigenically distinct serotypes—  
100 each of which is further subdivided among four to seven distinct genotypes; infection with one  
101 serotype is thought to result in lifelong immunity to that same serotype (homotypic immunity) but  
102 only temporary (up to two-year) protection against different serotypes (heterotypic immunity) (3).  
103 Heterotypic secondary infections are often more clinically severe due to an interaction with pre-  
104 existing flavivirus-specific antibodies known as antibody-dependent enhancement (ADE) (4, 5). In  
105 regions with multiple circulating endemic flaviviruses, this interplay makes the dynamics of  
106 dengue difficult to interpret at local, subnational, or national levels. Dynamical inference is further  
107 challenged by the multifaceted disease ecology characteristic of any arbovirus—for which  
108 infections are also impacted by changes in human land use, behavior, or movement, as well as  
109 the distribution and abundance of arthropod vectors. Nonetheless, national health systems in  
110 DENV-endemic regions rely on mathematical models to inform resource allocation on a year-to-  
111 year basis—ranging from vector control to hospital capacity for supportive care, given no  
112 currently available treatments for dengue. Improved understandings of the drivers of dengue  
113 transmission are therefore crucial for public health efforts, especially in resource-scarce settings.

114 Southeast Asia (SEA) represents ~70% of global reported dengue cases (1).  
115 Surprisingly, while dengue is largely classified as an urban disease, only 46% of the SEA  
116 population is considered urban. For most SEA countries, roughly 35-55% of the total population is  
117 concentrated in urban areas co-localizing with the highest dengue burdens; Singapore reports the  
118 largest urbanized population percentage in SEA (100%), while Cambodia—with 16 million  
119 people—reports the lowest (24%) (6). Like many SEA countries, Cambodia nonetheless exhibits  
120 significant peri-urban sprawl surrounding major metropolitan centers like the capital city, Phnom  
121 Penh (7, 8). Dengue was first detected in Cambodia in 1963 (9), though passive surveillance—via  
122 reporting of clinically diagnosed cases from public health centers and hospitals to the national  
123 level—was not adopted until 1980, following political instability and civil war in the late 1970s (10).  
124 In 2001, the National Dengue Control Program (NDCP) was inaugurated in Cambodia, and in  
125 2002, the NDCP formally adopted the WHO clinical case definitions of dengue and its  
126 complications as criteria for the surveillance program (10, 11). The NDCP surveillance system is  
127 largely limited to clinicosyndromic diagnoses, meaning that reported cases often correspond to  
128 more severe heterotypic secondary DENV infections (12), which are reported collectively without  
129 the ability to systematically distinguish between serotypes (11). Nonetheless, the NDCP also  
130 instituted some active surveillance efforts in Cambodia in 2001, which included limited virological  
131 testing to identify distinct serotypes at sentinel sites in four provinces, which were expanded to 15  
132 provinces by 2021 (10, 11).

133 Over the past two decades, all four dengue serotypes have been detected in Cambodia  
134 by virological surveillance (11), though cases have been largely dominated by one or two

135 serotypes in a given year—with DENV-1 and DENV-3 most common in the early 2000s and  
136 DENV-1 and DENV-2 predominant in the last decade (11). Cambodia witnessed three major  
137 dengue epidemics across this period—in 2007, 2012, and 2019 (11). The first epidemic, in 2007,  
138 occurred coincidentally with a genotype replacement event in DENV-1 (13, 14), though cases  
139 were dominated by DENV-3, marking the last year of this serotype’s dominance in the region (10,  
140 14). The second epidemic, in 2012, has been largely attributed to DENV-1 (11, 15–17), and the  
141 third, in 2019, appears to have been driven by co-circulation of both DENV-1 and DENV-2 (11).  
142 Consistent with the global dengue phenomenon of 2019 (1), Cambodia suffered its worst dengue  
143 epidemic on record in this year, with approximately 40,000 total cases reported across all 25  
144 provinces—a likely drastic underestimation of the true disease burden (18). Indeed, the past  
145 twenty years of surveillance in Cambodia have witnessed, on average, steadily increasing  
146 dengue incidence, coupled with a steady increase in the mean age of reported dengue infection  
147 (11). The latter has been anecdotally attributed to an aging population following demographic  
148 transition, as similar phenomena have been reported previously in neighboring Thailand (19, 20),  
149 as well as in Nicaragua (21).

150 Explosive periodic outbreaks are a hallmark of dengue virus disease, though the multiple  
151 drivers of these phenomena have long been debated (20, 22–28). Seasonal climate cycles are a  
152 strong predictor of annual cycling for many arboviruses, including dengue (29, 30), and climate  
153 has been implicated as a possible driver of multiannual dengue periodicity, as well. In Thailand,  
154 multiannual dengue cycles demonstrate coherence with El Niño phenomena (26), and epidemic  
155 years exhibit more synchronized dynamics across latitudes (26), as well as higher correlation with  
156 local temperature than do inter-epidemic periods (25). The interaction of demography and  
157 heterotypic immunity is also thought to play an important role in driving multiannual cycles for  
158 dengue (20, 22, 31, 32), which, in Thailand, show elongated periodicity as a result of declining  
159 birth rates and slower build-up of the susceptible population over the past half-century (20).  
160 Virology also plays a key role in many dengue epidemics, which have, historically, been linked to  
161 turnover in the dominant regional serotype (32–34) or to replacement of a dominant viral  
162 genotype with a serologically homotypic but phylogenetically divergent viral lineage (14, 35).  
163 Indeed, recent work links the magnitude of periodic dengue epidemics to antigenic evolution;  
164 large epidemics tend to result from the takeover of those DENV lineages most antigenically  
165 distinct from previously circulating strains of the same serotype or most antigenically similar to  
166 lineages of a different serotype (35).

167 The past two decades of changing dengue dynamics in Cambodia have taken place  
168 alongside extensive, rapid, heterogenous development across much of SEA, with significant peri-  
169 urban sprawl expanding beyond central mega-city limits and high-density population centers  
170 springing up around industry hubs (often factories) in otherwise rural areas (7, 8). Longitudinal  
171 phylodynamic studies of georeferenced DENV sequences from Thailand have demonstrated the  
172 importance of microscale transmission—particularly at the household level—in generating DENV  
173 diversity in urban Bangkok, predicting that DENV transmission will intensify as peri-urban settings  
174 in SEA become better connected (36). Nonetheless, investigations into the dynamical drivers of  
175 dengue transmission in rural and peri-urban settings have been limited to date. As climatic  
176 changes drive increases in the population at-risk for dengue infection in SEA and elsewhere (29,  
177 30, 37), better-designed active surveillance programs and improved targeting and evaluation of  
178 vector control interventions are greatly needed (38).

179 Here, we explore the dynamics of dengue virus transmission across the past two  
180 decades in peri-urban Cambodia, investigating the potential mechanisms that underly periodic  
181 epidemics, particularly the epidemic of 2019. We queried a 19-year dataset (2002-2020) of  
182 serotype-agnostic dengue case counts from the NDCP, aggregated at the province level, to, first,  
183 interrogate the role that climate played in driving epidemic spikes in 2007, 2012, and 2019, and  
184 second, more generally, explore the impact of climate on annual and multiannual cycling across  
185 the time series. We, third, fit catalytic models to the age-structured incidence of reported dengue  
186 disease to estimate the annual force of infection (FOI), at the province level, across this time  
187 series (20, 39, 40), then considered the national surveillance data in the context of our own active  
188 febrile surveillance study carried out in peri-urban Kampong Speu province from 2019-2020 (41).  
189 Whole genome sequencing of DENV from serum samples collected in part with our active  
190 surveillance program identified the first record of the DENV-2 Cosmopolitan lineage ever  
191 documented in Cambodia (42). Phylodynamic analysis of the spread of the DENV-2  
192 Cosmopolitan lineage in this region suggests that this new genotype drove pathogenic infections  
193 in older age individuals in 2019, contributing to the largest documented dengue outbreak on  
194 record for Cambodia. Finally, we constructed an age-structured discrete-time, dynamical model to  
195 simulate the interplay of climate, demography, immunology, and virology which combine to  
196 structure two decades of dengue dynamics in Cambodia.

197

## 198 **RESULTS**

### 199 **Though warmer than average, epidemic years were not major climate anomalies.**

200 Because of the widely acknowledged role of climate as a driver of arboviral disease  
201 globally (29, 30), coupled with recent work out of Thailand highlighting coherence between El  
202 Niño climate anomalies and dengue epidemics (26), we first explored the influence of changing  
203 temperature and precipitation on dengue caseload in Cambodia. To this end, we first aggregated  
204 high-resolution temperature and precipitation data at the Cambodian province level, across two-  
205 week intervals from 2002-2019 and sought to address the extent to which epidemic years  
206 represented climatic anomalies over this time period. We identified a characteristic annual  
207 variation in both temperature and precipitation, which was largely recapitulated across provinces  
208 and years. Temperature peaked in the first half of each year, between April and July, consistently  
209 across all provinces and preceding the peak in dengue caseload (Fig. S1). Precipitation peaked  
210 in the latter half of each year, between August and October (Fig. S2). Generalized additive  
211 modeling (GAMs) (43) demonstrated that, after controlling for intra-annual variation, temperature  
212 has increased significantly across the past two decades in all provinces; no significant interannual  
213 changes were detected for precipitation (Fig. S3-S4; Table S1). Additional GAMs and climate  
214 data normalized into z-scores indicated that the epidemic years of 2012 and 2019 were hotter  
215 than average for the time series, while 2007 was cooler, consistent with the observed interannual  
216 increase in temperature (Fig. S5). Years 2015-2016, which spanned a major El Nino event in  
217 SEA (but did not correspond to a dengue epidemic) (44), were also hotter than average. By  
218 contrast, 2007 had higher-than-average precipitation, while 2019 had lower-than-average  
219 precipitation, and 2012 did not deviate from the mean; in the years preceding all three major  
220 dengue epidemics, precipitation was not significantly different from average (Fig. S6). We  
221 concluded that, while both temperature and dengue incidence increased across our time series,  
222 epidemic years were not characterized by any remarkably aberrant climatic profile.

223

224 **Climate-informed transmission rates failed to recover epidemic dynamics in a TSIR model.**

225 To more mechanistically interrogate the role of climate as a driver of dengue epidemics in  
226 Cambodia, we developed a simple, climate-informed time series Susceptible-Infected-Recovered  
227 (TSIR) model (45–48), which we fit to dengue case counts, aggregated over two week intervals at  
228 the province level, for the three inter-epidemic periods (2002–2006, 2008–2011, and 2013–2018).  
229 Though typically used to describe the transmission dynamics of perfectly immunizing childhood  
230 infections, such as measles (46, 47), TSIR has been applied to dengue dynamics previously and  
231 offers an effective means by which to isolate the impact of climate on transmission, despite  
232 oversimplifying the multiple serotype dynamics of dengue virus disease (49–53).

233 We used biweekly transmission rates recovered from TSIR fits to the inter-epidemic  
234 periods, as well as climate-informed transmission rates for epidemic years projected at the  
235 province level from lagged temperature and precipitation data, to predict epidemic-year cases  
236 (Fig. 1; *Methods*; *SI Appendix*). We found that TSIR successfully recaptured the timing of annual  
237 dengue epidemics across the 22 provinces considered, with the recovered transmission rate  
238 peaking between May and August, slightly preceding reported cases. The magnitude and timing  
239 of transmission varied by province and between the three inter-epidemic periods, showing no  
240 consistent pattern of directional change in magnitude with time (Table S2). TSIR-estimated  
241 transmission was significantly positively associated with higher temperature and precipitation  
242 (lagged, respectively, such that climate variables preceded transmission by a median 3.5 months  
243 for temperature and 1 month for precipitation) in the corresponding province across all inter-  
244 epidemic periods (Table S3–S4). More rapid transmission gains were observed for corresponding  
245 increases in temperature vs. precipitation (Fig. S7–S9; Table S4). Nonetheless, climate-informed  
246 transmission rates for epidemic years were not substantially different from rates fitted to inter-  
247 epidemic periods, reflecting the absence of major climate anomalies across the time series (Fig.  
248 S10).

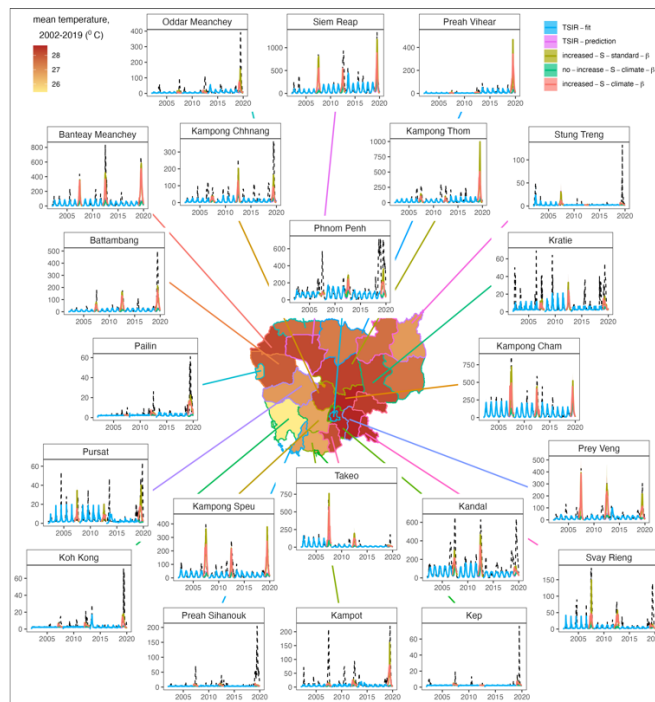

249  
250 **Figure 1. Climate-informed TSIR insights into epidemic dynamics of DENV in Cambodia.** Inset panels show

251 province level clinicosyndromic reported DENV cases (*dashed black lines*) with fitted TSIR output to the three inter-  
252 epidemic periods (2002-2006, 2008-2011, 2013-2018; *blue lines*) and TSIR projections for epidemic years (2007, 2012,  
253 2019) under trained biweekly transmission rate ( $\beta$ ) estimates (*pink lines*), incorporating a factorial increase in the  
254 susceptible population (*gold lines*), using a climate-projected  $\beta$  estimated from lagged temperature and precipitation data  
255 by province (*green lines*), or, finally, using both climate-projected  $\beta$  and a factorial increase in the susceptible population  
256 (*red lines*). Parameter estimates are available for viewing in *SI Appendix*, Table S2, S5. The center map shows province  
257 level administrative boundaries for Cambodia, shaded by the mean biweekly temperature from the 2020 climate data.  
258

259 Despite recovering the intra-annual timing of transmission, as expected, TSIR  
260 underpredicted the magnitude of epidemic year caseloads for all provinces (Fig. 1). Climate-  
261 informed transmission rates improved TSIR projections but still failed to recover epidemic peaks  
262 (Fig. 1). Inclusion of an amplification term in the susceptible population at the beginning of each  
263 epidemic year facilitated TSIR's recovery of the epidemic year caseloads (*Methods*) (53). In the  
264 absence of climate input into the transmission rate, the proportional increase in the susceptible  
265 population needed to recover the epidemic peak was a median 1.8x for 2007, 2.10x for 2012, and  
266 2.17x for 2019 (Table S5). The proportional increase in the susceptible population needed to  
267 recover the epidemic peak was not significantly lower when epidemic year cases were projected  
268 using climate-informed transmission rates for 2007 and 2012 (paired student's t-test: [2007]  
269  $t=0.33$ ,  $p>0.1$ ; [2012]  $t=-0.52$ ;  $p>0.1$ ) and only marginally lower for 2019 ( $t=1.31$ ,  $p=0.1$ ),  
270 suggesting (at most) a minimal role for temperature and precipitation in driving epidemic  
271 dynamics (Table S5). For many provinces, the combination of climate-informed transmission rate  
272 with susceptible augmentation still fell short of effectively capturing epidemic caseloads,  
273 highlighting the need for alternative explanations for these high transmission years.  
274

#### 275 **Wavelet analysis showed enhanced synchrony in dengue dynamics across provinces and** 276 **climate time series in epidemic years.**

277 Consistent with previous reports out of neighboring Thailand (26), wavelet decomposition  
278 of the biweekly dengue time series, at the province level, demonstrated statistically significant  
279 peaks in the amplitude and average wavelet power, of, respectively, both annual (Fig. 2A, S11A)  
280 and multiannual (Fig. 2B, S11B) cycles in dengue incidence during the three epidemic years (54).  
281 As also witnessed in Thailand (26), we observed significantly elevated synchronicity between  
282 provinces in the timing and amplitude of yearly dengue incidence, as measured both by pairwise  
283 Pearson's correlation coefficient (Fig. 2C) and cross-wavelet power (Fig. S11), in epidemic vs.  
284 non-epidemic years. Synchronicity in the annual incidence data was negatively associated with  
285 geographic distance between provinces, though patterns were less clear than have been  
286 previously described in neighboring regions (26) (Fig. S12). High synchronicity between annual  
287 case data for paired provinces was significantly positively associated with high temperature,  
288 precipitation, and population size of a focal province (Fig. S12; Table S6).

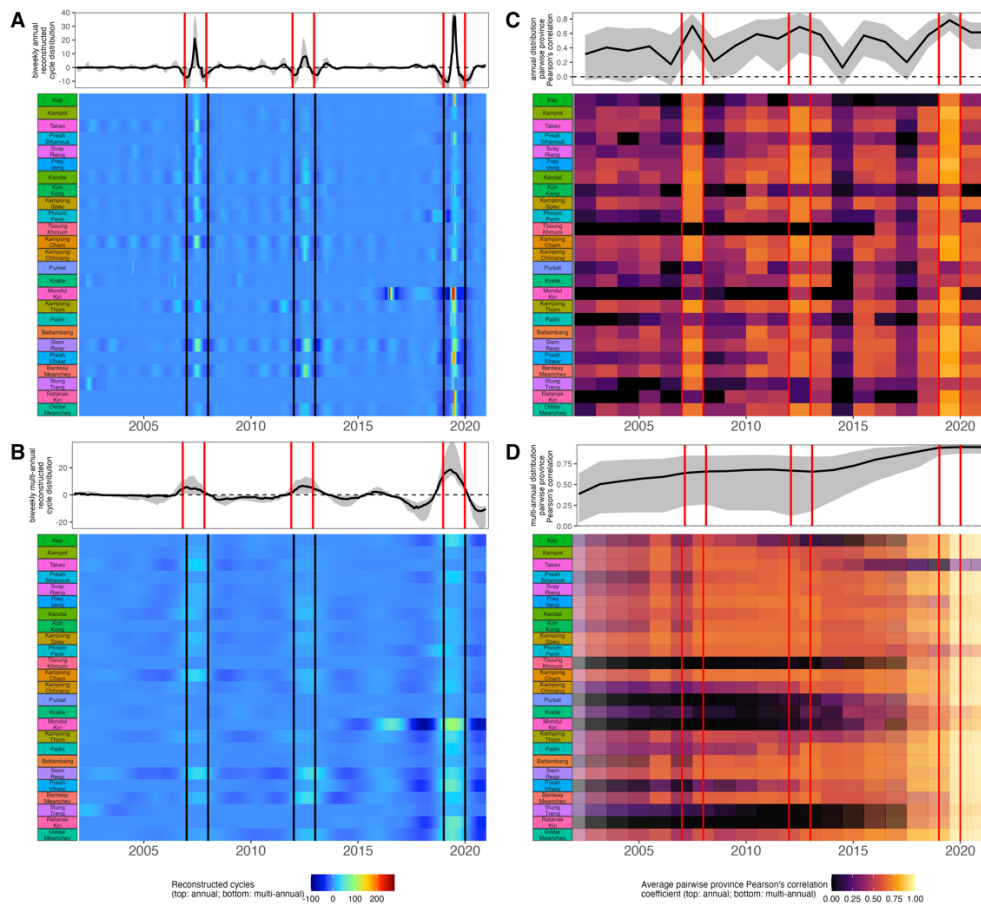

289  
290  
291  
292  
293  
294  
295  
296  
297  
298  
299

**Figure 2. Wavelet reconstructions show heightened synchrony in epidemic years for Cambodian dengue.** Reconstructed **A** annual and **B** multiannual dengue cycles by province, by year from NDCP incidence per 100,000 population. **C** Mean pairwise Pearson's correlation coefficient ( $\rho$ ) for annual dengue incidence between focal province and all other provinces through time. **D** Mean  $\rho$  comparing province-to-province reconstructed multiannual dengue cycles across a 5-year sliding window, with overlapping window frames plotted (partially translucent) atop one another. In all panels, epidemic years are highlighted by vertical red or black bars. Top panels indicate the distribution of corresponding values (median = solid line; max-to-min range = gray shading) observed across all provinces within each timestep. X-axis labels are marked on January 1 of the corresponding year.

300 For multiannual cycles, we observed a trend of steadily increasing synchronicity (Fig. 2D)  
301 and cross-wavelet power (Fig. S11D) between provinces through time, though no peaks occurred  
302 in epidemic years. Again consistent with recent work from Thailand (25), cross-wavelet power  
303 between raw dengue incidence and the corresponding, province level mean temperature and  
304 total precipitation (grouped biweekly) peaked in epidemic years (Fig. S13 AB). At the multiannual  
305 scale, cross-wavelet power between province level reconstructed dengue cycles and the time  
306 series of temperature and precipitation largely increased across the time series (Fig. S13CD),  
307 though values were highest slightly preceding the 2019 epidemic and overlapping the 2015-2016  
308 El Niño event (44). The same pattern was observed when comparing monthly reconstructed  
309 multiannual dengue cycles and the Oceanic Niño Incidence (ONI), the monthly measure of El  
310 Niño activity (Fig. S13E). For temperature, precipitation, and ONI, cross-wavelet power with  
311 multiannual dengue cycles appeared to peak earlier in more southern provinces and move  
312 gradually northward over several years (Fig. S13DE). All told, wavelet analyses suggested a role



313 for climate in synchronizing annual dengue epidemics across provinces, but only minimal support  
 314 for a hypothesis of multiannual climate cycles driving periodic epidemics across our time series.  
 315 In contrast to reports from two decades prior in Thailand (20), the periodicity of multiannual  
 316 dengue cycles across provinces also did not increase in duration throughout our time series,  
 317 despite decreasing birth rates over the same period (Fig. S14). This perhaps reflects the relative  
 318 slowdown in both birth and death rate declines in Cambodia over the past two decades, when  
 319 compared with the dramatic declines witnessed twenty years prior (Fig. S14).

320

321 **Mean age of reported dengue infection increased across the study period, corresponding**  
 322 **to a declining force of infection.**

323 Previous work has reported a trend of increasing mean age of reported dengue infection  
 324 across the past two decades in Cambodia at the national level (11); we confirmed this to be  
 325 consistent at the province level, as well (Fig. 3A,B; Fig. S15; Table S7). At the national level, the  
 326 mean age of reported dengue infection increased from 6.79 years (95% CI: 5.85-7.72) in 2002 to  
 327 10.34 years (95% CI: 9.41-11.27) in 2020 ( $p < 0.001$ ). Increases in age of reported cases were  
 328 even more severe in more remote provinces: in the distant northeastern province of Mondul Kiri,  
 329 for example, the mean reported age of infection increased from 3.72 years (95% CI: 1.97-5.47) in  
 330 2002 to 21.18 years (95% CI: 20.84-21.53) in 2020 (Fig. 3A; Fig. S15; Table S7).

331

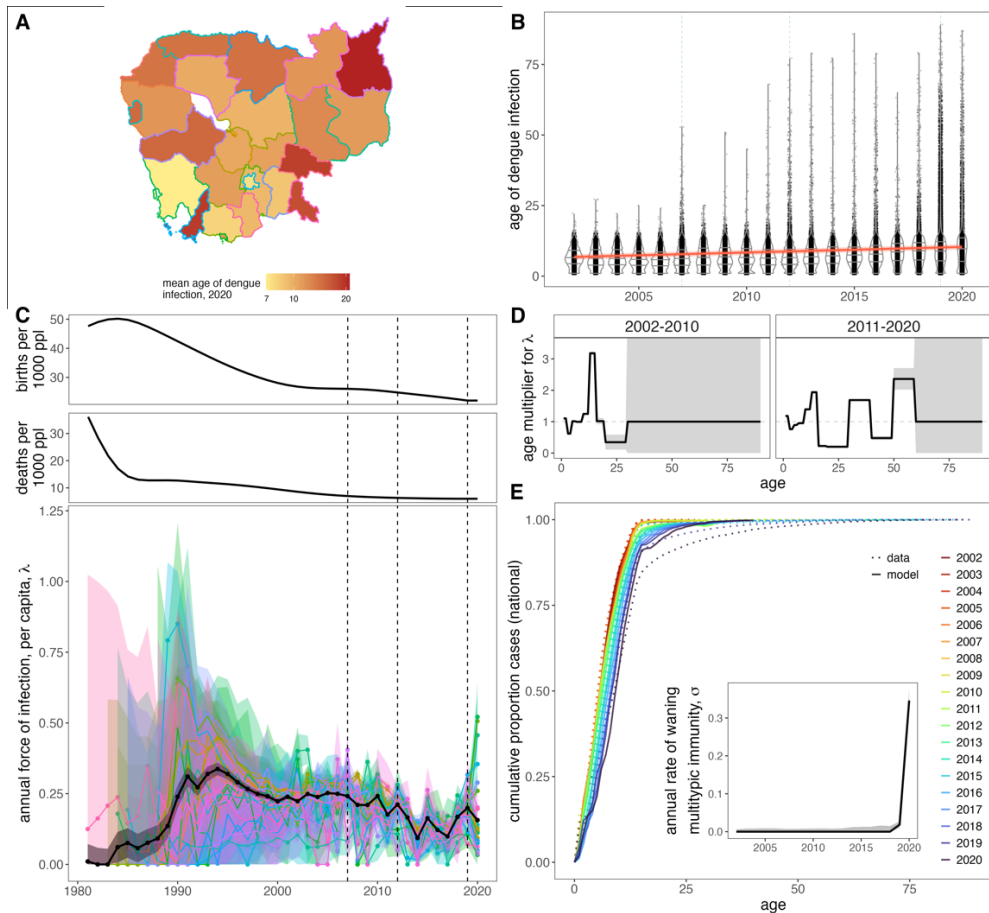

332

333 **Figure 3. Demographic transition underpins declining force of infection and increasing age of reported dengue**  
 334 **incidence in Cambodia. A** Mean age of reported dengue infection, by province in the last year of the NDCP time series

335 (2020). **B** Age distribution of reported dengue cases by year, with violin plots highlighting changes in the interquartile  
336 range of cases. The interannual trend in the mean age of dengue infection is plotted as a solid red line, with 95%  
337 confidence intervals by standard error shown as a narrow, translucent band behind it (Table S7). Epidemic years (2007,  
338 2012, 2019) are highlighted by a light blue, dashed line in the background. **C** National (black) and province level (colored)  
339 estimates for the annual force of infection from 1981 (the birth year of the oldest individual in the first year of the NDCP  
340 time series) to 2020. 95% confidence intervals from the hessian matrix are shown as translucent shading. FOI estimates  
341 are compared against national birth and death rates for Cambodia across the time series, with epidemic years highlighted  
342 by vertical dashed lines. **D** Age modifiers to the FOI fit as shared across all provinces for 2002-2010 and 2011-2020  
343 subsets of the data, with 95% confidence intervals by profile likelihood shown as translucent shading (note that the  
344 likelihood profile was flat in age categories 30+ for years 2002-2010 and 60+ for years 2011-2020 so no FOI modification  
345 was applied here). **E** Cumulative increase in the proportion of cases reported by age at the national level, colored by year.  
346 Data are shown as dotted lines and model output as solid lines. Model includes national FOI estimates from **C**, age  
347 modification terms from **D**, and time-varying waning multitypic immunity as shown in the inset.  
348

349 To interrogate the mechanistic drivers of this pattern, we estimated the annual force of  
350 infection (FOI, or  $\lambda$ ), the rate at which susceptibles become infected, by fitting a catalytic model  
351 with multiple serotype exposures to the province level data for every year in the dataset (2002-  
352 2020) and the 22 years preceding the onset of the time series, dating back to the birth year of the  
353 oldest individual in the first year of the data (Fig. 3C) (20, 39, 40). As in previous models for  
354 dengue (20, 39), we assumed that reported cases represented secondary, symptomatic  
355 infections more likely to report to public hospitals and clinics. Resulting patterns in FOI by  
356 province largely mirrored those recovered at the national level (Fig. S16), demonstrating a  
357 consistently high FOI in the early 1990s, roughly corresponding to the years in which individuals  
358 born in Cambodia's 1980s birth pulse (which followed severe population reductions resulting from  
359 civil war in the late 1970s) would likely be experiencing secondary infections. The FOI  
360 subsequently demonstrated a gradual decline across the time series, interspersed with minor  
361 local peaks during epidemic years.  
362

### 363 **Age-structured FOI modifications and waning multitypic immunity in 2019-2020 improved** 364 **the model's ability to recapture observed data.**

365 Inspired by previous studies in other systems (19–21), we next fit 26 (thirteen per  
366 decade) multiplicative age modification parameters, shared across all provinces and a subset of  
367 years, to allow for modulation of annual FOI across individuals in different age categories (Fig.  
368 3D). Incorporation of age modifiers improved model fits to the data across all provinces (Table  
369 S8). Consistent with recent work in Thailand (19), we identified a high hazard of infection in  
370 adolescents (13-15 year-olds) across the time series. In the second decade of the time series, we  
371 additionally noted an elevated age-specific hazard of infection in 30-39 year-olds and 50-59 year-  
372 olds, corresponding to reported symptomatic infections in older age individuals.

373 This support for elevated infection rates in older age individuals led us to revisit our  
374 assumption that reported cases corresponded to clinically apparent secondary infections only.  
375 Visualization of the age distribution of reported cases by year at both the national (Fig. 3B) and  
376 province levels (Fig. S15) indicated that, in addition to increases in the mean reported age of  
377 dengue infection, the past two decades of dengue incidence in Cambodia have also witnessed  
378 expansion in the age *range* of reported cases—such that approximately 1% of reported cases  
379 (712/68597) in 2019 occurred in individuals over the age of 45, with 61 infections reported in  
380 individuals >70 years in age. We also observed an isolated spike in the age distribution of  
381 reported cases in some provinces in the earlier epidemic years of 2007 and 2012 (Fig. S15). To  
382 allow for symptomatic infections in older age-individuals, we modified the two-serotype catalytic  
383 modeling framework presented in previous work (20, 21, 39) to permit individuals to wane from a

384 state of multitypic immunity back to that of monotypic immunity subject to renewed hazard of  
385 symptomatic re-infection (*SI Appendix*). Using this new modeling framework, we estimated a  
386 shared parameter across all provinces, which corresponded to the rate of waning multitypic  
387 immunity ( $\sigma$ ). No signature of waning multitypic immunity was observed across the time series as  
388 a whole; however, when we allowed  $\sigma$  to vary by year, we estimated a significant signature of  
389 waning multitypic immunity in 2019 and 2020 data only (Fig. 3E, *inset*). In general, incorporating  
390  $\sigma$  improved model fits to the data when added both to the FOI-only model and the FOI model  
391 modified by age class (Table S8). Our best fit FOI model including both age modifications and  
392 time-varying multitypic waning immunity effectively recaptured the observed cumulative  
393 proportion of cases per age class per year at national (Fig. 3E) and province (Fig. S17) levels. In  
394 general, cases accumulated more slowly across age classes with advancing years, tracking  
395 declining FOI.

396  
397

### 398 **DENV genotyping in Kampong Speu province from 2019-2020 suggests a possible clade** 399 **replacement event in DENV-2.**

400 The high burden of pathogenic cases in older individuals in 2019 next led us to ask  
401 whether the virology of the DENV strains associated with the epidemic could play a role in driving  
402 observed patterns in the data. To address this question, we leveraged serum samples amassed  
403 during an active febrile surveillance study that we carried out in Kampong Speu province,  
404 adjacent to the Cambodian capital city of Phnom Penh, between July 2018 and December 2020  
405 (41, 42). In this study, we screened 760 samples collected from 697 unique individuals who  
406 reported to participating sites with fever during the study period, identifying 123 PCR-positive  
407 DENV infections. All patients reported within a self-identified window of five days since fever  
408 onset. From this data subset of positive DENV cases, we sequenced and published 122 whole  
409 DENV genomes (57 DENV-1, 61 DENV-2, and 4 DENV-4; Table S9), representing one-third of  
410 full genome DENV-1 sequences and over half of DENV-2 sequences currently available for  
411 Cambodia—thus emphasizing the considerable challenges faced in undertaking genomic  
412 epidemiology in resource-scarce settings (42). Maximum likelihood phylogenetic analysis of the  
413 resulting genomes demonstrated that most DENV-2 sequences recovered in 2019 and 2020  
414 belonged to the DENV-2 Cosmopolitan III lineage, the first record of this genotype reported in  
415 Cambodia, though its introduction has been reported recently in several other neighboring  
416 countries in SEA (55–58). All DENV-1 sequences clustered in the Genotype 1 lineage, consistent  
417 with previously reported genotype records in Cambodia (Fig. S18). In our study, sequences  
418 collected from 2019 were largely split between DENV-1 (N=52) and DENV-2 (N=35) serotypes  
419 (59.8% vs. 40.2% respectively), while sequences collected in 2020 were dominated by DENV-2  
420 (N=26/31, 83.9 %). In 2019 and 2020, respectively, 26/35 (74.3%) and 24/26 (92.3%) of DENV-2  
421 sequences belonged to the Cosmopolitan III lineage, with the remaining sequences clustering in  
422 the Asian-1 DENV-2 lineage previously reported in Cambodia.

423 We constructed serotype-specific Bayesian timetrees (59, 60) from DENV sequences to  
424 assess the divergence time of 2019-2020 lineages from sequences previously reported from  
425 Cambodia and from neighboring SEA countries across our 2002-2020 study period (Fig. 4; Table  
426 S9). The majority of DENV-1 lineages (detailed in Fig. S18) diverged relatively recently from 2015  
427 and 2016 Cambodian sequences last reported within this serotype (Fig. 4A), with a time to Most  
428 Recent Common Ancestor (tMRCA) of approximately 7.9 years (MRCA at February 2013, 95%

429 HPD: July 2012 – September 2013). BLAST analysis indicated that this cluster of DENV-1  
 430 Cambodia sequences demonstrated the highest identity to sequences recovered from China in  
 431 2019, while another, rarer subset of DENV-1 sequences more closely resembled those recovered  
 432 from Thailand in 2019 and 2020 (61). By contrast, DENV-2 sequences in the Cosmopolitan III  
 433 lineage demonstrated high divergence from previously reported sequences for Cambodia (which  
 434 have been recorded only in the Asian-1 lineage), with a tMRCA of approximately 88.5 years  
 435 (MRCA at 1932, 95% HPD: 1927-1937). BLAST analysis indicated that DENV-2 Cosmopolitan  
 436 sequences recovered from Cambodia in 2019 and 2020 showed the highest similarity to  
 437 sequences previously derived from recent DENV-2 Cosmopolitan outbreaks in Singapore,  
 438 Malaysia, Sri Lanka, and Thailand (53, 57, 61). Locally, within our regional data subset for SEA,  
 439 sequences tightly clustered in both geographic space and time were highly phylogenetically  
 440 related (Fig. S19), consistent with previous studies emphasizing the importance of microscale  
 441 transmission dynamics for DENV (36).  
 442

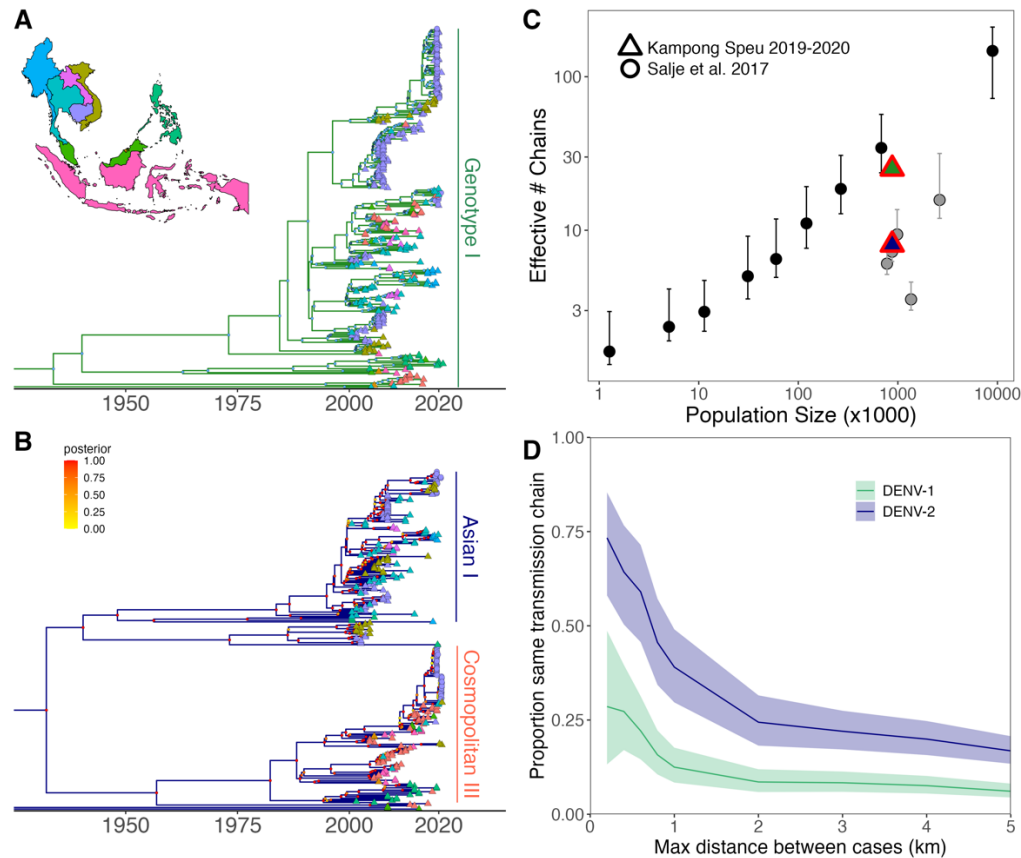

443 **Figure 4. Bayesian time trees highlight geospatial structuring in evolutionary relationships for Cambodian**  
 444 **dengue.** **A** Map of Southeast Asia with countries colored corresponding to sequences derived from each country, as  
 445 shown in tip points on phylogenetic timetrees constructed using BEAST 2 for DENV-1 and **B** DENV-2. X-axis highlights  
 446 divergence times between corresponding sequences. Reference sequences from GenBank are represented as triangle  
 447 tips and sequences contributed by active febrile surveillance in this study as circles. Cambodia and corresponding  
 448 sequences are shaded purple. Clade bars indicate the genotype of corresponding sequences within each serotype:  
 449 genotype-1 for DENV-1 and Asian-1 and Cosmopolitan III for DENV-2. A detailed inset of geographic localities for 2019-  
 450 2020 Cambodia sequences can be viewed in Fig. S19. **C** Number of effective transmission chains for circulating DENV  
 451 estimated across populations of varying densities. Black (urban) and gray (rural) circles with corresponding 95%  
 452 confidence intervals depict estimates for Thailand from Salje et al. 2017 (36), while triangles depict estimates from our  
 453 Kampong Speu active febrile surveillance study for DENV-1 (green) and DENV-2 (blue). **D** Proportion of sequence pairs  
 454

455 for Kampong Speu DENV-1 (*green*) and DENV-2 (*blue*) genomes which are derived from the same transmission chain  
456 (*i.e.* share a MRCA <6 months since the earlier sequence in the pair) across progressively longer Euclidean distances  
457 separating the localities from which the sequences were recovered.  
458

459 Prior genomic analysis of geolocated DENV sequences in Thailand has demonstrated  
460 the importance of microscale, household-level transmission in driving DENV dynamics,  
461 particularly in the highly urbanized setting of Bangkok (36). In Bangkok, human population size  
462 was shown to be positively correlated with the number of distinct DENV transmission chains (a  
463 measure of phylogenetic diversity) circulating in the region (Fig. 4C). In more rural settings in  
464 Thailand, this relationship was less pronounced, but the authors predicted that increasing  
465 urbanization of these regions would drive corresponding increases in DENV diversity in the  
466 future. We compared patterns in DENV genomic diversity captured in geolocated sequences from  
467 2019 and 2020 in peri-urban Cambodia with those previously investigated in Thailand (Fig. 4C),  
468 building transmission chains from sequence pairs which shared a MRCA within the past six  
469 months. The number of transmission chains recovered for endemic DENV-1 in our study region  
470 closely matched that predicted by population size in urban Bangkok. For DENV-2, which showed  
471 less overall diversity than DENV-1, the lower number of transmission chains per population size  
472 better approximated that recovered from rural regions in Thailand, in keeping with a hypothesis of  
473 recent invasion (Fig. 4C). We further demonstrated a tighter coupling between phylogenetic  
474 relatedness and the physical, geographic distance between paired sequences for DENV-2 vs.  
475 DENV-1 sequences, consistent with epidemic invasion behavior and the tight clustering of cases  
476 in space and time (Fig. 4D).

477

#### 478 **Mechanistic simulations of clade replacement in an age-structured model captured** 479 **patterns qualitatively similar to those seen in the data.**

480 To consolidate findings from TSIR and FOI analysis with insights gleaned from genomic  
481 epidemiology in 2019-2020, we constructed a mechanistic, age-structured discrete time  
482 deterministic epidemic model in biweekly timesteps (*SI Appendix*) (62–64) to simulate two- and  
483 three-serotype dengue infections in a population demographically structured to mimic that of  
484 Cambodia over the past half-century. We initiated simulations incorporating seasonal variation in  
485 transmission as estimated by TSIR (Fig. 1) and annual variation in FOI corresponding to the time  
486 series of national estimates (Fig. 3), then modified dynamics to test hypotheses of potential  
487 drivers underlying the spike in cases and corresponding expansion in age structure witnessed in  
488 the three epidemics identified in the NDCP data (Fig. 5). As with our FOI analysis, we modeled  
489 secondary infections as reported cases, except when testing hypotheses of tertiary case  
490 detection or waning multitypic immunity and reinfection.

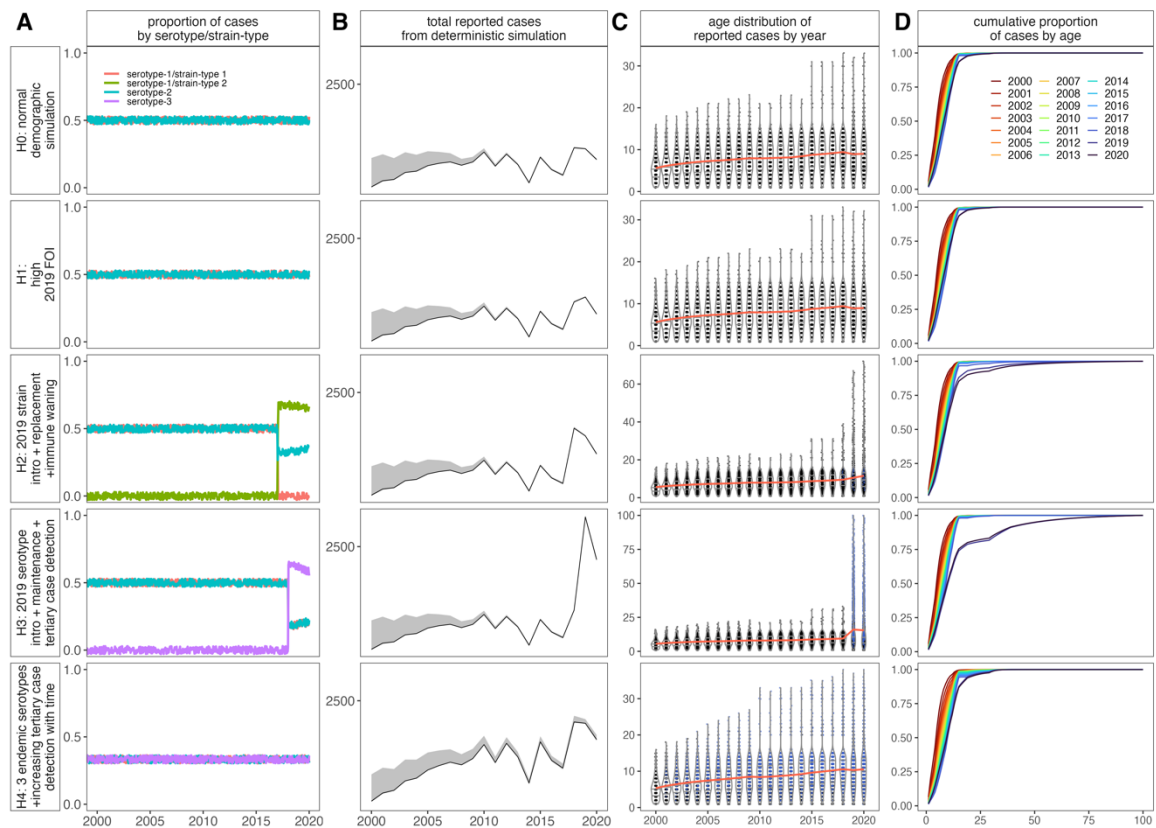

491  
 492 **Figure 5. Simulations of genotype or serotype introduction events recapitulate observed variation in the age**  
 493 **structure of reported dengue cases from Cambodian data. A** Structure of deterministic simulation outlining  
 494 hypotheses of possible mechanisms underlying patterns in observed data for Cambodia: (H0) normal demographic  
 495 simulation, (H1) 2-circulating serotypes with a climate-driven FOI spike in epidemic year 2019, (H2) novel genotype  
 496 invasion and clade replacement with waning immunity in 2019, (H3) novel serotype invasion and 10% tertiary case  
 497 detection in 2019, (H4) 3 endemic circulating serotypes and progressively increasing rates of tertiary case  
 498 detection (from 0 to 100%) across time series. **B** Total reported cases (solid line = mean FOI; translucent shading = 95% confidence  
 499 interval for FOI), **C** age distribution of reported cases by year (black = secondary; blue = tertiary), and **D** cumulative  
 500 proportion of reported cases by age, by year from each corresponding simulation.  
 501

502  
 503 For simplicity, we focused our analysis on drivers of the 2019 epidemic, simulating  
 504 scenarios by which 2-circulating serotype dynamics were interrupted by a climate-driven spike in  
 505 FOI in the epidemic year (H1), a genotype invasion and clade-replacement event with waning  
 506 immunity within the serotype (H2), or a third serotype invasion (H3), then compared these to a  
 507 hypothesis of 3-serotype circulation and increasing detectability of tertiary infections through time  
 508 (H4) (Fig. 5A). We found that all hypotheses could recover high overall caseloads in epidemic  
 509 years (Fig. 5B), though climate-driven increase in FOI (H1) did little to alter the mean age or age  
 510 distribution of reported infection beyond baseline (Fig. 5C). By contrast, H2, H3, and H4 all  
 511 elevated the mean age of infection, expanded the age distribution of cases, and produced a more  
 512 gradual proportional accumulation of cases by age (Fig. 5D), in keeping with patterns in the  
 513 observed data. Impacts on the age distribution of reported cases were less extreme for our H4  
 514 simulations but could be easily modified by varying the rate of increase in the proportion of  
 515 tertiary cases detected with time, which we did not estimate from the data. To highlight the link  
 516 between the underlying simulated transmission dynamics and our prior inference from the

517 observed data in Fig. 3, we additionally fit our two-serotype catalytic FOI model with waning  
518 immunity to the simulated data generated for each hypothesis. Using this approach, we  
519 successfully recovered the input FOI in all simulations (Fig. S20), and the model structure  
520 estimated a signature of waning immunity for H2 and H3 simulations, which produced simulated  
521 data that closely resembled the true data (e.g. elevated mean age of reported infection and  
522 expansion of age distribution of reported cases in epidemic year).

523         Though we focused simulations on hypothesized drivers of the 2019 epidemic, we also  
524 repeated analyses with H1, H2, and H3 alterations introduced in 2007 to highlight their  
525 downstream impacts on the rest of the time series (Fig. S21). By definition, H4 did not define a  
526 change in a specific year. High epidemic FOI (H1) simulations for 2007 recovered the same spike  
527 in cases but had minimal impact on the age of reported infection, while both hypotheses of  
528 genotype invasion and clade replacement with waning immunity (H2) and third serotype invasion  
529 (H3) recovered a pattern consistent with the observed data: that of increasing mean and  
530 distribution of reported infection age concentrated around the epidemic year, which returned to  
531 baseline following the perturbation. Age increases were more extreme for H3, despite being  
532 suppressed by the increased overall FOI resulting from the introduction of a third serotype with  
533 equivalent FOI into the system. To date, no evidence of serotype invasion or turnover has been  
534 presented for the 2019 Cambodian epidemic, though serotype exchange is thought to have  
535 played a role in the 2007 epidemic (10, 14). Genotype invasion and clade replacement events  
536 within a serotype have been described in Cambodia in 2007 (13, 14) and 2019 (this paper).

537

## 538 **DISCUSSION**

539         Drawing from two decades of national surveillance data and a more recent genomic  
540 cohort study, we queried the mechanisms that underly dengue virus transmission and drive  
541 periodic dengue epidemics in Cambodia. All told, our study highlights the complex interplay of  
542 climate, demography, immunology, and virology that dictates the dynamics of dengue virus  
543 disease in endemic settings.

544         Our investigations of climate effects on dengue transmission in Cambodia mirror those  
545 previously reported in Thailand (25, 26), Sri Lanka (53), and China (49), emphasizing the role of  
546 temperature, and—to a lesser extent—precipitation, in synchronizing annual dynamics in  
547 epidemic years. Consistent with prior work that highlights a role for El Niño in driving multiannual  
548 dengue cycles in other systems (26, 27, 65, 66), we observed synchrony between reconstructed  
549 multiannual dengue cycles in Cambodia and the ONI; however, this synchrony appeared to peak  
550 during the robust 2015-2016 El Niño, which did not correspond to one of the three major dengue  
551 epidemic years in our dataset. The muted impact of El Niño on dengue dynamics in Cambodia  
552 could reflect an increased homogenization of caseloads at higher temperatures in more recent  
553 years (25)—which is likely to mask more subtle effects on transmission—or may also be a  
554 consequence of less pronounced latitudinal variation (and corresponding climate differences) in  
555 Cambodia, as compared to other countries where these phenomena have been studied (e.g.  
556 Thailand). Nonetheless, our analysis suggests that warmer temperatures do play a role in driving  
557 epidemic dynamics for Cambodian dengue, and likely contributed to high caseloads in 2019. As  
558 temperatures increase globally, dengue transmission is likely to accelerate, and variation in both  
559 the timing of annual dengue transmission and multiannual peaks in caseload may become more  
560 homogenous.

561 In addition to climate, our data and corresponding analysis emphasizes the importance of  
562 human demography and prior immunity in structuring dengue transmission globally. Consistent  
563 with studies conducted elsewhere (19–21), we observed a pattern of increasing mean age of  
564 reported dengue infection that we effectively recaptured by modeling a declining force of infection  
565 through time—which we attributed to declining birth and death rates consistent with Cambodia’s  
566 demographic transition. Certainly, other mechanisms of demographic change (e.g. immigration  
567 and emigration) could also impact infection dynamics. Cambodia experienced a net negative  
568 migration rate across the time series investigated (67); as the majority of Cambodian migrants are  
569 young adults who seek employment in neighboring Thailand (68), it is possible that their  
570 emigration could lower the force of dengue infection even further. However, the Cambodian  
571 migrant population comprises <0.5% of the total national population (67), suggesting that birth  
572 and death rates are still likely the dominant drivers of observed patterns in the data. Nonetheless,  
573 migration rates can be 10-fold higher in border provinces and could have correspondingly  
574 elevated impacts in these regions (68).

575 The declining force of infection for dengue through time is somewhat counterintuitive  
576 considering recent explosive epidemics in Cambodia and across the globe. Nonetheless, we  
577 provide evidence for a high frequency of reported cases in older age individuals that underlies the  
578 high case burden in epidemic years. Our study is unique from previous investigations in  
579 recognition, not only of escalation of the mean age of reported dengue infection, but also of the  
580 expanding age range of reported disease. Indeed, symptomatic individuals > 70 years in age  
581 during the 2019 epidemic are difficult to reconcile under assumptions by which reported cases  
582 correspond to clinically apparent secondary infections only. In our modeling framework, we take a  
583 novel approach to account for these infections by allowing for waning multitypic immunity and  
584 repeated symptomatic infections in older age individuals.

585 Recent analyses out of the Thailand system highlight a similarly surprising uptick in case  
586 reports among older individuals in more recent years (19), which the authors attribute to  
587 increased detectability in tertiary and quaternary infections with time. The authors offer a series of  
588 hypothetical explanations for increasing case detectability across their time series: that tertiary  
589 and quaternary dengue infections might be more pathogenic (and therefore more detectable) due  
590 to an abundance of comorbidities in older individuals, that immunopathology may be exacerbated  
591 in older patients who experienced longer durations between repeat infections; or that waning  
592 multitypic immunity could allow for repeat infections in the oldest age cohorts (our hypothesis).  
593 Our analyses in the Cambodia system are not mutually exclusive with any of these explanations;  
594 however, we hypothesize that, were comorbidities or immunopathogenesis in older individuals  
595 driving patterns in the observed data, we would expect to see an hour-glass shape in  
596 symptomatic cases, with reduced reporting in middle-aged individuals who have progressed  
597 beyond secondary exposures but are at lower risk for both comorbidities and immunopathology.  
598 Instead, we see a gradual tapering in the age-frequency of infection, which expands in range with  
599 time (Fig. S15), consistent with the hypothesis of waning multitypic immunity. This latter  
600 hypothesis, when considered in light of a genotype replacement event, can also explain isolated  
601 expansion in the age range of reported cases witnessed in conjunction with epidemic year 2007  
602 and 2012 in our time series, while the first two hypotheses cannot.

603 Our deterministic model simulations demonstrate how short-term (1–3 year) spikes in the  
604 age distribution of reported cases, independent of the mean annual trend in the time series, can  
605 be achieved both via introduction of a novel genotype with waning immunity or via introduction of



606 a novel tertiary serotype into an endemic, two-serotype system (equally plausible would be  
607 introduction of a quaternary serotype into an endemic three-serotype system). Though limited in  
608 scope, PCR-based sentinel surveillance data provide no support for serotype turnover associated  
609 with the 2019 dengue epidemic in Cambodia (11). By contrast, genome sequencing data from our  
610 own febrile cohort study in Kampong Speu province offer support for a genotype replacement  
611 event. Recent analyses of the Thailand dengue system link transitions in serotype dominance  
612 and clade replacement of genotype sublineages within a single serotype to epidemic magnitude  
613 (35). This work suggests that large epidemics typically result from the invasion, expansion, and  
614 evolution of viral lineages that diverge from previously circulating lineages of the same serotype  
615 but are more closely related to co-circulating viruses of endemic heterotypic serotypes, reflecting  
616 the viral fitness advantage afforded by ADE (31). In Thailand, the most severe epidemics were  
617 linked to clade replacement of a resident viral genotype by an evolutionarily fitter DENV lineage  
618 within the same serotype, resulting in a 'selective sweep', which subsequently reduced overall  
619 viral diversity and, consequently, diminished between-serotype antigenic differences (35). In the  
620 2019 epidemic in Cambodia, the Cosmopolitan genotype introduction, followed by serotypic and  
621 genotypic homogeneity in 2020, are consistent with the dynamics of clade replacement within the  
622 DENV-2 serotype. Indeed, clade replacement dynamics have been previously witnessed in  
623 conjunction with epidemic outbreaks in Cambodia (13, 14) and elsewhere (53, 57, 69–71).

624 As one major limitation of this study, we did not obtain virus isolates and undertake  
625 antigenic cartography (72), which would be needed to resolve whether the invading Cosmopolitan  
626 III DENV-2 genotype in Cambodia in 2019 was, indeed, antigenically distinct from previously  
627 circulating Asian-1 lineages and, potentially, more antigenically similar to endemic heterotypic  
628 viruses. Indeed, because much of our inference is derived from serotype-agnostic national  
629 surveillance data, we are unable to rigorously evaluate the role of a possible genotype  
630 replacement event in particularly driving a high burden of disease in the oldest-age (>70 years)  
631 individuals in the dataset. Unfortunately, our febrile cohort was derived from an ongoing childhood  
632 cohort study (41), largely limiting the resulting sequence data to younger cases. Genotyped  
633 infections in the oldest-age individuals would do much to illuminate these hypotheses—and could  
634 provide even more insights if paired with serotyping prior to the 2019 epidemic.

635 Several published studies offer regional explanations for the global dengue phenomenon  
636 of 2019. Recent analyses from Brazil, for example, argue that a low FOI in 2017 and 2018  
637 resulting from new public health interventions and behavioral modifications implemented in the  
638 wake of the Zika virus epidemic, drove a resurgence in cases in 2019 and an expansion of  
639 specific lineages of DENV-1 and DENV-2 that had been circulating cryptically for much of the  
640 past decade (73). Independent work in the same region indicates that the DENV-2 lineage  
641 responsible for the Brazilian outbreak additionally caused a clade replacement event within the  
642 serotype (70). Reports from other 2019 dengue epidemics in Bhutan and Bangladesh point to  
643 increased monsoon activity coincident with mass movement of people for school and religious  
644 holidays as key drivers of the surge in South Asia (74, 75)—while others still highlight a role for  
645 reintroduction of previously extinct serotypes, combined with high rainfall and insecticide  
646 resistance in these same regions (76). Notably, these latter studies lack data on both host  
647 susceptibility and viral phylogenetics needed to query the hypotheses presented here. Dengue  
648 surged worldwide in 2019, though the factors driving this surge appear to be somewhat  
649 heterogenous across ecosystems. Nonetheless, our study lends support for the role of climate in  
650 synchronizing epidemic dynamics across landscapes; it is possible that optimal climate conditions

651 may facilitate expansion of low prevalence lineages which possess an intrinsic fitness advantage  
652 (e.g. higher replication rate, shorter incubation period (77)) over resident genotypes, thus driving  
653 epidemics. Previous modeling studies have suggested that invading dengue lineages may  
654 circulate at low prevalence in a host population for many years prior to detection, expansion, and  
655 displacement of resident clades in the same serotype (78).

656 Here, we propose the novel introduction of the DENV-2 Cosmopolitan genotype, coupled  
657 with a subtle climate-driven increase in FOI, and overlaid on the background of an aging  
658 population with correspondingly aging multitypic immunity, as one possible explanation for  
659 Cambodia's largest recorded dengue epidemic to date. Our study emphasizes the extraordinary  
660 dearth of publicly available DENV sequence data for Southeast Asia; indeed, DENV is sequenced  
661 so infrequently in Cambodia that it is impossible to know whether 2019 truly marked the first year  
662 of DENV-2 Cosmopolitan introduction to the country, or simply the year of intensified expansion  
663 and consequential epidemic dynamics. More broadly, our work illustrates the importance of the  
664 combined forces of climate, demography, immunology, and virology in driving increasingly severe  
665 dengue epidemics. As the global burden of dengue continues to expand, ongoing serological and  
666 genomic surveillance is needed to improve epidemic forecasting in Southeast Asia and around  
667 the world.

668

669

## 670 **METHODS**

671

### 672 *Ethics*

673 This study was approved by the National Ethics Committee on Human Research and the  
674 National Institutes of Health (NIH) Institutional Research Board. Written informed consent was  
675 obtained from the individual participant or the parent or guardian of the child participants enrolled  
676 in this study. This study was registered at clinicaltrials.gov as NCT04034264 and NCT03534245.

677

### 678 *Enrollment and sample collection*

679 Nursing staff at the Kampong Speu (KPS) Referral Hospital identified, consented,  
680 enrolled, and collected demographic data from study participants. Participants, aged 6 months to  
681 65 years of age, presented to the outpatient department with a documented fever of 38°C or  
682 greater in the previous 24 hours. Participants with clinical symptoms and signs consistent with  
683 dengue were first screened for infection using SD Bioline DengueDuo rapid tests for NS1 antigen,  
684 pan-dengue IgM and IgG. Sera was collected and processed as described elsewhere for RNA  
685 extraction, and confirmatory qRT-PCR testing for DENV-1 – 4 was performed for rapid-test  
686 positive participants (41).

687

### 688 *Cambodia national dengue data*

689 We obtained a 2002-2020 time series of age-structured dengue cases reported at the  
690 national level from clinicosyndromic surveillance efforts administered by the National Dengue  
691 Control Program (NDCP) of the Cambodian Ministry of Health. Since inception of the national  
692 surveillance system in 2002, each Cambodian province reports cases on a monthly basis to the  
693 national authorities who compile these reports for public health use and reporting to the World  
694 Health Organization. The date of each case and the corresponding age and gender of each

695 patient are reported, in addition to the province in which the case was diagnosed (25 total). We  
696 binned cases to every-two-week (biweekly) intervals for application to TSIR modeling and  
697 summarized by age class within each year for application to FOI models. We note that one  
698 province (Tboung Khmum) was created only recently, such that the corresponding time series  
699 spanned from 2016-2020. As a result, this province was eliminated from both TSIR and FOI  
700 analyses.

701

#### 702 *Spatially-resolved climate data*

703 Climate variables, including daily mean temperature ( $^{\circ}\text{C}$ ) and total daily precipitation  
704 (mm) from 2002 to 2019 were downloaded from the ERA5 Daily Aggregates dataset for each  
705 Cambodian province (N=25) using Google Earth Engine (79). Comparable data were not  
706 available for 2020. The spatial resolution for the ERA5 data set is approximately 31 km; however,  
707 we aggregated climate data to the size of each province using the Cambodia Administrative  
708 Boundaries Level 1 shapefile (80) during the extraction process, then computed the mean  
709 temperature ( $^{\circ}\text{C}$ ) and total precipitation (mm) over biweekly intervals, from January 1, 2002 to  
710 December 31, 2019, while accounting for leap years.

711

#### 712 *Climate analyses*

713 We first investigated the climate data to identify intra- and interannual trends and identify  
714 any years within the dataset that might be considered climatic anomalies. For both temperature  
715 and precipitation, we constructed two generalized additive models (GAMs) in the Gaussian  
716 family. The first GAMs incorporated a response variable of, respectively, biweekly mean  
717 temperature or total precipitation, at the province level, across the time series, with a fixed  
718 predictor of the interaction of year (as a numeric) with province, a cyclic smoothing spline by  
719 biweek of year, and a random effect of province. As a result, each GAM fit 25 distinct slopes and  
720 25 distinct y-intercepts to the corresponding temperature or precipitation data to describe the  
721 interannual climate trend for each province, while controlling for intra-annual variation (Fig. S3-  
722 S4; Table S1). We next constructed two GAMs with the same response variables but  
723 incorporating predictor variables of year (a factor) as a random effect and a cyclic smoothing  
724 spline by biweek of year. These GAMs enabled us to identify specific years that significantly  
725 deviated from the mean climate trends (Fig. S5-6; Table S1). Finally, we reduced temperature  
726 and precipitation time series by province into z-scores by subtracting, respectively, the mean  
727 biweekly temperature and precipitation of the entire time series from each biweekly datapoint per  
728 province, then dividing by the standard deviation. We visualized z-scores to highlight years in  
729 which many provinces exhibited z-scores outside the 95% confidence intervals, representing a  
730 climate anomaly (Fig. S5-6).

731

#### 732 *TSIR modeling*

733 We next fit time series Susceptible-Infected-Recovered models (45–47) to the province  
734 level time series for the three inter-epidemic periods (2002-2006, 2008-2011, and 2013-2018), in  
735 order to highlight the extent to which epidemic year case loads deviated from projections based  
736 on susceptible reconstruction by birth rates alone. The TSIR model leverages an input time series  
737 of case counts, births, and total population to estimate the susceptible population and disease  
738 transmission rate at intervals corresponding to the generation time of the pathogen in question  
739 (here, roughly two weeks (81)). Under TSIR assumptions, the transmission rate is held constant

740 from year to year, though allowed to vary intra-annually to reflect seasonal dynamics. Using the R  
 741 package tsiR (45), we fit the TSIR model individually to an input time series of biweekly dengue  
 742 case counts by province. Because births were reported only annually at the national level for  
 743 Cambodia (67), we divided these among biweeks of each year and scaled them spatially by the  
 744 relative population size of each province. For each inter-epidemic period, we reconstructed the  
 745 susceptible population from the regression of cumulative cases on cumulative births, using either  
 746 a Gaussian or a linear regression, depending on which approach provided the better fit to each  
 747 data subset, as summarized in Table S2. The new province, Tboung Khmum, was excluded from  
 748 TSIR analysis because case reporting only began in this region in 2016. Provinces Ratanak Kiri  
 749 and Mondul Kiri were additionally excluded, due to poor performance of regression models for  
 750 susceptible reconstruction within each region (Table S2;  $R^2$  for 2007/2012/2019 data subsets for  
 751 Ratanak Kiri: 0.24/0.54/0.36; and for Mondul Kiri: 0.15/0.20/0.51).

752 While fitting TSIR, we allowed the transmission rate ( $\beta$ ) to vary across 26 biweekly  
 753 intervals in a single year and the homogeneity parameter ( $\alpha$ ) to vary with each model fit. Using  
 754 the model trained on each inter-epidemic period, we first projected cases in the subsequent  
 755 epidemic years (2007, 2012, 2019) while reconstructing the susceptible population from  
 756 corresponding epidemic year births alone. This first exercise demonstrated the ineffectiveness  
 757 with which simple TSIR assumptions were able to recover case counts reported from epidemic  
 758 years; therefore, we next sought to quantify the increase in the assumed susceptible count  
 759 needed to capture reported cases. Previously, Wagner et al. 2020 (22) demonstrated analytically  
 760 that, under short time horizons, the susceptible population ( $S'$ ) in a two-strain DENV system, in  
 761 which a new secondary serotype invades a population previously dominated by a single endemic  
 762 serotype, can be approximated by the equation:

$$763 \quad S' \approx S + \frac{R_1 \rho_2 N}{I_1} \approx S^* \left[ 1 + \frac{\rho_2 \gamma \beta}{\mu(\gamma + \mu)} \right]$$

764 in which  $S$  corresponds to individuals naïve to all prior infection, while  $R_1$  and  $I_1$  correspond to  
 765 individuals recovered from or infected with the endemic strain only, and  $N$  and  $\rho_2$  respectively  
 766 represent the total population size and the rate of exogenous importation of a new serotype.  $S^*$   
 767 then corresponds to the steady-state value of the Susceptible population under assumptions of a  
 768 single endemic serotype only, while  $\mu$ ,  $\gamma$ , and  $\beta$  encompass the rates of birth, death, and  
 769 transmission of exogenous infections of the new serotype. Building on these assumptions, we  
 770 first calculated the factorial increase in the reconstructed susceptible population needed to  
 771 recover case counts for the three epidemic years.

772

### 773 *Panel regression and climate-informed TSIR*

774 To evaluate whether consideration of epidemic-year climate factors could improve TSIR  
 775 predictions of epidemic cases, we next followed previous work to explore the extent to which  
 776 biweekly transmission was predicted by climate (53). Because dengue is a vector-borne disease,  
 777 we hypothesized that transmission should be lagged from climate effects on the vector population  
 778 and, correspondingly, first conducted cross correlation analysis to determine the optimal lag  
 779 between the time series of biweekly mean temperature and total precipitation on transmission at  
 780 the province level. In keeping with prior work for dengue (53), we considered only lag times of up  
 781 to one year in which the climate predictor led the empirical transmission rate; however, we  
 782 deviated from previous studies by allowing the optimal lag to vary by province and inter-epidemic

783 period. We found that the optimal time lag between peak climate predictor and peak dengue  
784 transmission ranged from 0.5 to 5 months (1 – 11 biweeks) for temperature (median = 3.5  
785 months) and from 0.5 to 9 months (1 – 18 biweeks) for precipitation (median = 1 month),  
786 consistent with prior analyses from Sri Lanka (53) (Table S3).

787 Once optimal lags for temperature and precipitation were obtained, inspired by previous  
788 work (48, 49, 53, 82), we next constructed a suite of regression models, incorporating a response  
789 variable of the log of biweekly province level transmission with the corresponding predictors of  
790 optimally lagged biweekly mean temperature and total precipitation for the province in question.  
791 We constructed separate regressions for each inter-epidemic period (2002-2006, 2008-2011, and  
792 2013-2018) and tested the sensitivity of transmission to climate predictors using a standard linear  
793 regression, a linear regression for precipitation paired with a Brière function for temperature (53,  
794 83), and a GAM (Fig. S8-10; Table S4). We then used lagged temperature and precipitation  
795 corresponding to each epidemic year in each province to project climate-informed transmission  
796 rates for 2007, 2012, and 2019. Results were qualitatively similar across all regression structures;  
797 as such, we report only GAM-projected transmission rates here (*SI Appendix*). Using climate-  
798 informed transmission rates, we again simulated TSIR to recover epidemic year predictions of  
799 caseload at the province level, which we evaluated against projections by TSIR fitted to the inter-  
800 epidemic periods and incorporating a proportional increase in the susceptible population.  
801 Because climate-derived transmission rates still failed to recover epidemic year peaks, we  
802 allowed for yet another susceptible amplification term to determine the relative increase in the  
803 susceptible population still needed to recover epidemic dynamics even after accounting for  
804 climate (Table S5).

805

#### 806 *Wavelet analyses*

807 We next used wavelet decomposition in the R package ‘WaveletComp’ (54) to explore  
808 annual and multiannual periodicity in dengue epidemics and corresponding climate variables. We  
809 converted biweekly case totals by province from the 2002-2020 NDCP dataset into incidence  
810 rates per 100,000 population, then, as in previous work (25, 26), used a Morlet wavelet with  
811 nondimensional frequency ( $\omega = 6$ ) to extract, detrend, and reconstruct annual cycles in dengue  
812 incidence with a maximum period of two years (52 biweeks) and multiannual cycles with periods  
813 ranging from two to 20 years (Fig. 2AB). We additionally calculated the average wavelet power in  
814 each biweekly timestep for both annual and multiannual cycles per province (Fig. S11AB). Next,  
815 we investigated synchronicity in dengue incidence across space by computing the Pearson’s  
816 correlation coefficient ( $\rho$ ) between province pairs, using the annual raw incidence and the  
817 reconstructed annual and multiannual cycles. All results for annual cycles were qualitatively  
818 similar to those for the annual raw incidence and are, therefore, not reported here. For annual  
819 incidence, we computed  $\rho$  for each province pair combination in yearly timesteps, then calculated  
820 the annual average  $\rho$  for each focal province compared against all other provinces (Fig. 2C). For  
821 multiannual cycles, we computed  $\rho$  for all pairwise province combinations across a sliding 5-year  
822 window. As with annual incidence, we then calculated the average  $\rho$  for each focal province per  
823 year, compared against all other provinces. Because 5-year cycles overlapped,  $\rho$  was averaged  
824 over multiple overlapping comparisons for each pairwise combination for all but the first and last  
825 year in the time series (Fig. 2D). For another measure of synchronicity, we additionally computed  
826 the cross-wavelet power spectrum for all province pairs, using both annual incidence rates in  
827 yearly timesteps and multiannual reconstructed cycles in 5-year intervals. As with the Pearson’s

828 correlation coefficient, we averaged the output of these analyses (here, significant values for  
829 cross-wavelet power) for each focal province, as compared with all other provinces, at the  
830 appropriate timestep (Fig. S11CD). Because patterns in synchronicity were most pronounced at  
831 the annual incidence scale, in order to identify statistical correlates of high synchronicity years  
832 and localities, we finally constructed a GAM with a response variable of  $\rho$ , as reported in Fig. 2C,  
833 a fixed predictor of the interaction of focal province and geographic distance to the province under  
834 comparison; smoothing predictors of biweekly mean temperature, total precipitation, and mean  
835 population size for the focal province; and a random effect of year (Fig. S12; Table S6).

836 Because this last analysis indicated some predictive role for climate in driving synchrony  
837 in dengue incidence, we next investigated coherence between case data and climate variables,  
838 as previously compiled for TSIR from 2002-2019 (Fig. S13). We first computed mean cross-  
839 wavelet power as a measure of synchrony between the biweekly time series of raw dengue  
840 incidence and mean temperature (Fig. S13A) and total precipitation (Fig. S13B) per province. We  
841 next calculated mean cross-wavelet power between reconstructed multiannual dengue cycles  
842 over a 5-year interval and the same two climate variables, again per province (Fig. S13CD).  
843 Finally, we reconstructed *monthly* multiannual dengue cycles for each province to compute  
844 average cross-wavelet power with the Oceanic Niño Index (ONI), a monthly time series that  
845 quantifies the intensity of the El Niño Southern Oscillation, which has been previously associated  
846 with dengue dynamics in SEA (Fig. S13E) (26, 27, 65, 66).

847 Lastly, we extracted the mean period from reconstructed multiannual dengue cycles by  
848 province and at the national level, to compare with publicly available demographic data (birth  
849 rates, death rates, population size (67)) that informed downstream analyses (Fig. S14).

850

#### 851 *Quantifying mean age of reported infection*

852 Our next analyses shifted the focus from climate to demographic drivers of dengue  
853 incidence. To this end, we first quantified the interannual trend in the mean age of reported DENV  
854 infection, by province, across our 2002-2020 time series. We fit a GAM with a response variable  
855 of age to a fixed predictor of the interaction of year and province, while also including a random  
856 effect of province, to allow both slope and y-intercept to vary by the locality over which the data  
857 were compiled. We visualized these interannual trends across the age distribution of reported  
858 cases by province (Fig. S15) and also summarized at the national level (Fig. 3AB; Table S7).

859

#### 860 *Force of Infection estimation*

861 We next used the age-stratified, province level surveillance data to estimate the annual  
862 FOI for DENV in Cambodia across the 19-year time series from 2002-2020. Methods for  
863 estimating FOI from age-stratified serological data for single-strain pathogens are well  
864 established (40, 84–87), and prior work has adapted these methods to account for the role of pre-  
865 existing heterotypic immunity in DENV infection (39) and modified them for application to age-  
866 structured incidence data, in lieu of serology (20). We applied the model developed by Ferguson  
867 et al. 1999 (39) and Cummings et al. 2009 (20) to age-structured incidence recovered from the  
868 NDCP data, at the province level, assuming reported cases to represent secondary infections and  
869 all individuals in the dataset to eventually experience exposure to multiple DENV serotypes  
870 across their lifetimes. We allowed for a unique FOI across each year in the time series but first  
871 assumed a constant FOI across all age cohorts within a single year. As in prior work, this method  
872 additionally supported the estimation of FOIs that predated our data time series, albeit with

873 diminished confidence as compared to our data-associated years. Specifically, we estimated one  
874 FOI per year per province, in addition to a summary FOI at the national scale, for all years  
875 predating the start of the 2002 time series and corresponding to the year of birth for the oldest  
876 individual in the first year of the corresponding subset of the data (Fig. S16; Table S8). For the  
877 national data (and for Takeo province), this corresponded to a 40-year time series, dating back to  
878 1981, the birth year of the oldest individual (22 years) in the first year of the dataset (*SI Appendix*;  
879 Table S8). No FOIs were estimated for the Tboung Khmum province for which the NDCP only  
880 began reporting data in 2016. We estimated mean FOI per serotype under assumptions of two  
881 circulating dengue serotypes in the region. Because FOI was estimated as a serotype average,  
882 these estimates would be proportionally depressed if instead accounting for three or four  
883 circulating dengue serotypes in the system. To highlight links to demography, we plotted FOI  
884 estimates collectively in comparison to national reported birth and death rates in Fig. 3C (67).

885 After fixing FOI by province, we next followed prior work (20) to estimate FOI modifiers by  
886 age cohort, shared across all provinces and all years of the data. Because of the wide range in  
887 the age distribution of cases across the time series under consideration, we fit thirteen age-  
888 specific modifiers to the fixed FOI values, which we allowed to vary between the first and second  
889 decades of the dataset, such that 26 FOI-modification terms were estimated in total (Table S8).  
890 Finally, after observing the extremely high age distribution of reported cases in the later years of  
891 the time series, we modified our previous model to allow for a rate of waning immunity from  
892 multitypic back to monotypic immunity ( $\sigma$ ), such that older individuals could experience renewed  
893 pathogenic infections likely to be reported in the data (*SI Appendix*). As with age-modification  
894 terms, we estimated waning multitypic immunity shared across all provinces and all years in the  
895 dataset after fixing FOI. Because little signal of waning multitypic immunity was evident across  
896 the entire time series, we next allowed  $\sigma$  to vary by year across the dataset. We compared fits of  
897 the FOI-only, FOI with age modification, FOI with waning multitypic immunity, and FOI with both  
898 age modification and waning multitypic immunity models to the data (Table S8), then simulated  
899 the resulting accumulation of cases with age from the best fit model at national (Fig. 3E) and  
900 province levels (Fig. S17).

901

### 902 *Viral sequencing*

903 Metagenomic Next-Generation Sequencing (mNGS) was applied to serum samples  
904 collected from all patients reporting with symptoms in our febrile cohort study. Briefly, pathogen  
905 mNGS libraries were prepared from isolated pathogen RNA and converted to cDNA Illumina  
906 libraries using the NEBNext Ultra II DNA Library Prep Kit (E7645) according to manufacturer's  
907 instructions. Library size and concentration were determined using the 4150 TapeStation system,  
908 Agilent, and Qubit 4 Fluorometer, Invitrogen (for quantitation only). External RNA Controls  
909 Consortium collection, ERCC, ThermoFisher, were used as indicators of potential library  
910 preparation errors and for input RNA mass calculation. Samples were sequenced on a NovaSeq  
911 (Illumina) instrument and an iSeq100 (Illumina) instrument using 150 nucleotide paired-end  
912 sequencing. A water ("no template") control was included in each library preparation.

913 Raw fastq files were uploaded to the CZID portal, a cloud-based, open-source  
914 bioinformatics platform, to identify microbes from metagenomic data (<https://czid.org>) (88).  
915 Potential pathogens were distinguished from commensal flora and contaminating microbial  
916 sequences from the environment by establishing a z-score metric based on a background  
917 distribution derived from 16 non-templated "water-only" control libraries. Data were normalized to

918 reads mapped per million input reads for each microbe at both species and genus levels. Taxa  
919 with z-score less than 1, base pair alignment less than 50 base pairs, NT  $\log(1/e)$  less than 10  
920 and reads per million (rpm) less than 10 were removed from analysis. Microbial sequences from  
921 the samples are available for access in the National Center for Biotechnology Information (NCBI)  
922 Sequence Read Archive.

923

#### 924 *Construction of consensus genomes*

925 We attempted to construct full-genome DENV sequences from any samples which were  
926 confirmed to be DENV-positive by RT-qPCR and which generated at least one reliable contig  
927 mapping to any serotype of DENV in the CZID pipeline. To generate full genome consensus  
928 sequences, we ran the ARTIC network's Nextflow consensus genome pipeline (89), mapping  
929 each sequence to the closest GenBank accession number hit in the original mNGS run of CZID,  
930 using a cutoff of 5 reads per nucleotide site to make a consensus call (sites with <5 reads were  
931 called as "N"). Sequences were additionally run through the CZID integrated consensus genome  
932 pipeline, again mapping to the closest hit identified in GenBank from the original mNGS  
933 assembly. Resulting consensus sequences from both assembly pipelines were then aligned with  
934 reference sequences and visually examined in Geneious Prime. Raw reads from mNGS were  
935 then mapped to each full genome contig in turn and examined manually to determine the correct  
936 call for each base pair.

937 Using these methods, we generated full or near-full genome sequences for 57 DENV-1,  
938 61 DENV-2, and 4 DENV-4 samples, representing 122 of the 123 DENV-positive patients  
939 identified in our dataset. All contributed genomes were >10,000 bps in length and had a  
940 maximum of 90 Ns (corresponding to <1% of the DENV genome). Resulting sequences were  
941 uploaded to NCBI as individual FASTA files (Table S9).

942

#### 943 *Phylogenetic and phylogenetic analysis*

944 We supplemented our own Cambodia sequences with all other Cambodian sequences  
945 for DENV-1 and DENV-2 available in GenBank at the time of analysis, selecting all full or partial  
946 genome nucleotide sequences >10,000 bp in length up to a collection date of December 31, 2020  
947 (DENV-1: tax id 11053, 192 sequences, including 57 contributed by this study; DENV-2: tax id  
948 11060, 116 sequences, including 61 contributed by this study). We further supplemented these  
949 Cambodia sequences with genomes collected from other major Southeast Asian countries (nine),  
950 which were Laos, Myanmar, Malaysia, Thailand, Vietnam, Brunei, Indonesia, the Philippines, and  
951 Singapore. All countries were represented in both the DENV-1 and DENV-2 datasets. To avoid  
952 overrepresenting certain countries outside of Cambodia, we limited sequence selection to a  
953 maximum of three randomly selected genomes collected per year from each available year per  
954 country, beginning in 2002, the year in which we began our national time series.

955 After selection, sequences were aligned separately by serotype in the program MAFFT  
956 (90), and the best fit nucleotide substitution model for each set of data was evaluated in the  
957 program ModelTest-NG (91). For both DENV-1 and DENV-2, a GTR+I+G4 nucleotide was  
958 determined to offer the best fit to the data. Using this best fit nucleotide substitution model, we  
959 next built a Bayesian phylogenetic tree for each set of DENV genomes in the program BEAST 2  
960 (60). We incorporated the date of sample collection for each sequence (or the midpoint of the  
961 year of collection if the date was not reported), and, after Salje et al. 2017 (36), we specified a  
962 strict molecular clock at a rate of  $7.9 \times 10^{-4}$  s/s/y (92) and a Coalescent Bayesian skyline prior in



963 our models. We ran Markov Chain Monte Carlo chains in BEAST 2 for 150 million iterations,  
964 logging results every 10,000 iterations. After chains completed, we removed the initial 10% of  
965 iterations as burn-in and evaluated parameter convergence in Tracer v1.6 (parameters were  
966 deemed to have converged at ESS values  $\geq 200$ ). We summarized resulting phylogenetic trees  
967 in TreeAnnotator and visualized summary trees in the R package ggtree (93) (Fig. 4AB; Fig.  
968 S19).

969 Finally, we computed a Maximum Likelihood phylogenetic tree to illustrate the  
970 phylogenetic placement of our new Cambodia sequences in relation to all previously described  
971 genotypes of DENV-1 and DENV-2. For this analysis, we included all Cambodian sequences of  
972 DENV-1 and DENV-2 available in NCBI, as well as a broadly representative subset of sequences  
973 within all known genotypes of DENV-1 (genotypes I, II, and III) and DENV-2 (genotypes Asian-I,  
974 Asian-II, Asian-American, American, Cosmopolitan I, Cosmopolitan II, and Cosmopolitan III). As  
975 with Bayesian timetrees, sequences were first aligned in MAFFT (90), and the best fit nucleotide  
976 substitution model was computed in ModelTest-NG (91). As before, we found that a GTR+I+G4  
977 best represented both sequence subsets; using this model, corresponding phylogenetic trees  
978 were then constructed in the program RAxML (94). Following best practices outlined in the  
979 RAxML-NG manual, 20 ML inferences were made on each original alignment and bootstrap  
980 replicate trees were inferred using Felsenstein's method (95), with the MRE-based bootstopping  
981 test applied after every 50 replicates (96). Resulting phylogenies were then visualized in ggtree  
982 (93) (Fig. S18).

983

#### 984 *Estimating transmission chains from sequence data*

985 Lastly, we followed methods outlined in Salje et al. 2017 (36) to calculate the proportion  
986 of sequences within each DENV serotype that could be attributed to the same transmission chain  
987 on our Bayesian timetrees, defined as having a most recent common ancestor within the past six  
988 months in the same season. The reciprocal of the proportion of sequences sharing a transmission  
989 chain corresponds to the effective number of transmission chains circulating in a given  
990 population. Thus, to compare our estimates of transmission chain density against those  
991 previously reported for Thailand (36), we computed the total effective number of transmission  
992 chains observed in our 2019-2020 sequence dataset, separately for DENV-1 and DENV-2, at the  
993 World Bank reported population density for Kampong Speu province (67) (Fig. 4C). We also  
994 compared the proportion of DENV-1 vs. DENV-2 sequences determined to share a transmission  
995 chain to the Euclidean distance separating the precise GPS coordinates of the collection points of  
996 each sequence pair (Fig. 4D).

997

#### 998 *Mechanistic modeling of age-structured dengue dynamics*

999 Finally, we constructed a mechanistic, age-structured discrete time deterministic  
1000 epidemic model in biweekly timesteps (*SI Appendix*) (62–64) to simulate two- and three-serotype  
1001 dengue infections in a population demographically structured to mimic that of Cambodia over the  
1002 past half-century. Using publicly-available national data for Cambodian birth rates (1960-2020)  
1003 (67), population age structure (1950-2020) (97), and age-specific mortality rates (1950-2020)  
1004 (98), we simulated the dynamics of two or three circulating DENV serotypes out to endemic  
1005 equilibrium, incorporating seasonal intra-annual variation in transmission as estimated from TSIR.  
1006 We then introduced the annual national FOI from 1999-2020, as previously estimated by fitting  
1007 catalytic models to the NDCP data (Fig. 3) and tracked the corresponding increase in the mean

1008 age of simulated dengue cases. We modified dynamics to test hypotheses of potential drivers  
1009 underlying the spike in cases and corresponding expansion in age structure witnessed in the  
1010 three epidemics identified in the NDCP data (Fig. 5). As highlighted in the 'Results' section, we  
1011 focused our analysis on drivers of the 2019 epidemic, simulating scenarios by which 2-circulating  
1012 serotype dynamics were interrupted by a climate-driven spike in FOI in the epidemic year (H1), a  
1013 genotype invasion and clade-replacement event with waning immunity within the serotype (H2),  
1014 or a third serotype invasion (H3), then compared these to a hypothesis of 3-serotype circulation  
1015 and increasing detectability of tertiary infections through time (H4) (Fig. 5A). To highlight the link  
1016 between the underlying dynamics and our prior inference from the observed data, as well as  
1017 check that our simulated dynamics recapitulated those witnessed in the actual data, we fit our  
1018 original Ferguson-Cummings two-serotype catalytic FOI model to the simulated data generated  
1019 from our mechanistic model for each hypothesis to recapture the input FOI (Fig. S20). Holding  
1020 FOI constant, we then estimated a time-varying signature of waning monotypic immunity for all  
1021 simulated time series (Fig. S20) and compared results. Finally, we repeated analyses with H1,  
1022 H2, and H3 alterations introduced in 2007 to highlight their downstream impacts on the rest of the  
1023 time series (Fig. S21).

1024

#### 1025 **DATA AVAILABILITY**

1026 All genome sequence data from this study have been submitted to the NCBI Sequence  
1027 Read Archive under Bioproject ID PRJNA681566. Consensus DENV sequences are also  
1028 available in GenBank, under accession numbers reported in Table S9. All bioinformatics code for  
1029 the initial mNGS assembly is available at <https://github.com/chanzuckerberg/idseq-workflows> and  
1030 all wet lab bench protocols are updated at  
1031 [https://docs.google.com/document/d/1RtNQc1D4or\\_ys7OxCCBjh4SDIdy7Jal4IE7if8EkHgE/edit](https://docs.google.com/document/d/1RtNQc1D4or_ys7OxCCBjh4SDIdy7Jal4IE7if8EkHgE/edit).  
1032 Further information on how to use ½ reaction volumes and FastSelect® are available upon  
1033 request. Code for generation of consensus genomes is available from the Artic Network at  
1034 <https://artic.readthedocs.io/en/latest/>. Raw data and detailed instructions of all specific analyses  
1035 undertaken to produce the figures and results presented here are available in our open access  
1036 github repository at: <https://github.com/brooklabteam/cambodia-dengue-national>. All other  
1037 reasonable data requests can be made to authors directly.

1038

#### 1039 **ACKNOWLEDGEMENTS**

1040 This research is supported by the Division of Intramural Research at the National Institute  
1041 of Allergy and Infectious Diseases at the National Institutes of Health and the Bill and Melinda  
1042 Gates Foundation [grant numbers OPP1211806, OPP1211841]. We thank patients and families  
1043 of Kampong Speu District Referral Hospital who participated in this study. We thank members of  
1044 the National Dengue Control Program not listed in the author byline and the Provincial Health  
1045 Department of Kampong Speu province in Cambodia. We thank all the other employees at the  
1046 Chan Zuckerberg Biohub and Chan Zuckerberg Initiative not listed in the author byline. We thank  
1047 Brian Moyer and the NIAID Office of Cyberinfrastructure and Computational Biology (OCIB) for  
1048 their assistance in improving the cyberinfrastructure of our Cambodian field sites. This work was  
1049 completed with resources provided by the University of Chicago's Research Computing Center.

1050

1051

1052

1053 **REFERENCES**

- 1054 1. World Health Organization, Dengue and severe dengue. *WHO Fact Sheets* (2022).
- 1055 2. S. Bhatt, *et al.*, The global distribution and burden of dengue. *Nature* **496**, 504–507 (2013).
- 1056 3. A. B. Sabin, Research on dengue during World War II. *American Journal of Tropical*
- 1057 *Medicine and Hygiene* **1**, 30–50 (1952).
- 1058 4. L. C. Katzelnick, *et al.*, Antibody-dependent enhancement of severe dengue disease in
- 1059 humans. *Science (New York, N.Y.)* **932**, 929–932 (2017).
- 1060 5. L. C. Katzelnick, *et al.*, Zika virus infection enhances future risk of severe dengue disease.
- 1061 *Science* **369**, 1123–1128 (2020).
- 1062 6. statista, Cambodia: Urbanization from 2010 to 2020.
- 1063 <https://www.statista.com/statistics/455789/urbanization-in-cambodia/>. (2022).
- 1064 7. T. N. Peng, “Southeast Asia’s demographic situation, regional variations, and national
- 1065 challenges” in D. Singh, M. Cook, Eds. (ISEAS Publishing, 2017), pp. 55–82.
- 1066 8. G. W. Jones, “The Population of Southeast Asia” (2013).
- 1067 9. Hahn, H., Chastel, C., Dengue in Cambodia in 1963. Nineteen laboratory-proved cases.
- 1068 *American Journal of Tropical Medicine and Hygiene* **19**, 106–109 (1970).
- 1069 10. R. Huy, *et al.*, National dengue surveillance in Cambodia 1980–2008: epidemiological and
- 1070 virological trends and the impact of vector control. *Bull. World Health Organ.* **88**, 650–657
- 1071 (2010).
- 1072 11. C. Yek, *et al.*, National dengue surveillance, Cambodia 2002–2020. *Bull World Health Org*
- 1073 **101**, 605–616 (2023).
- 1074 12. D. S. Burke, A. Nisalak, D. E. Johnson, A prospective study of dengue infections in
- 1075 Bangkok. *The American Journal of Tropical Medicine and Hygiene* **38**, 172–180 (1988).
- 1076 13. V. Duong, *et al.*, Genetic diversity and lineage dynamic of dengue virus serotype 1 (DENV-
- 1077 1) in Cambodia. *Infection, Genetics and Evolution* **15**, 59–68 (2013).
- 1078 14. O. O’Connor, *et al.*, Potential role of vector-mediated natural selection in dengue virus
- 1079 genotype/lineage replacements in two epidemiologically contrasted settings. *Emerging*
- 1080 *Microbes and Infections* **10**, 1346–1357 (2021).
- 1081 15. A. A. Lover, *et al.*, Spatial epidemiology and climatic predictors of paediatric dengue
- 1082 infections captured via sentinel site surveillance, Phnom Penh Cambodia 2011-2012. *BMC*
- 1083 *Public Health* **14** (2014).
- 1084 16. Y. Arima, M. Chiew, T. Matsui, Epidemiological update on the dengue situation in the
- 1085 Western Pacific Region, 2012. *Western Pacific surveillance and response journal : WPSAR*
- 1086 **6**, 82–89 (2015).
- 1087 17. S. Ly, *et al.*, Asymptomatic dengue virus infections, Cambodia, 2012–2013. *Emerging*
- 1088 *Infectious Diseases* **25**, 1354–1362 (2019).
- 1089 18. S. Vong, *et al.*, Under-recognition and reporting of dengue in Cambodia: A capture-
- 1090 recapture analysis of the National Dengue Surveillance System. *Epidemiology and Infection*
- 1091 **140**, 491–499 (2012).
- 1092 19. A. T. Huang, *et al.*, Assessing the role of multiple mechanisms increasing the age of dengue
- 1093 cases in Thailand. *Proc. Natl. Acad. Sci. U.S.A.* **119**, e2115790119 (2022).
- 1094 20. D. A. T. Cummings, *et al.*, The impact of the demographic transition on dengue in Thailand:
- 1095 Insights from a statistical analysis and mathematical modeling. *PLoS Medicine* **6** (2009).

- 1096 21. L. C. Katzelnick, *et al.*, Dynamics and determinants of the force of infection of dengue virus  
1097 from 1994 to 2015 in Managua, Nicaragua. *Proceedings of the National Academy of*  
1098 *Sciences of the United States of America* **115**, 10762–10767 (2018).
- 1099 22. N. Ferguson, R. Anderson, S. Gupta, The effect of antibody-dependent enhancement on  
1100 the transmission dynamics and persistence of multiple-strain pathogens. *Proc. Natl. Acad.*  
1101 *Sci. U.S.A.* **96**, 790–794 (1999).
- 1102 23. S. I. Hay, *et al.*, Etiology of interepidemic periods of mosquito-borne disease. *Proc. Natl.*  
1103 *Acad. Sci. U.S.A.* **97**, 9335–9339 (2000).
- 1104 24. M. A. Johansson, D. A. T. Cummings, G. E. Glass, Multiyear climate variability and  
1105 dengue—El Niño Southern Oscillation, weather, and dengue incidence in Puerto Rico,  
1106 Mexico, and Thailand: A longitudinal data analysis. *PLoS Med* **6**, e1000168 (2009).
- 1107 25. B. García-Carreras, *et al.*, Periodic synchronisation of dengue epidemics in Thailand over  
1108 the last 5 decades driven by temperature and immunity. *PLoS Biol* **20**, e3001160 (2022).
- 1109 26. W. G. van Panhuis, *et al.*, Region-wide synchrony and traveling waves of dengue across  
1110 eight countries in Southeast Asia. *Proc. Natl. Acad. Sci. U.S.A.* **112**, 13069–13074 (2015).
- 1111 27. B. Cazelles, M. Chavez, A. J. McMichael, S. Hales, Nonstationary Influence of El Niño on  
1112 the Synchronous Dengue Epidemics in Thailand. *PLoS Med* **2**, e106 (2005).
- 1113 28. D. A. T. Cummings, *et al.*, Travelling waves in the occurrence of dengue haemorrhagic  
1114 fever in Thailand. *Nature* **427**, 344–347 (2004).
- 1115 29. J. H. Huber, M. L. Childs, J. M. Caldwell, E. A. Mordecai, Seasonal temperature variation  
1116 influences climate suitability for dengue, chikungunya, and Zika transmission. *PLoS Negl*  
1117 *Trop Dis* **12**, e0006451 (2018).
- 1118 30. E. A. Gould, S. Higgs, Impact of climate change and other factors on emerging arbovirus  
1119 diseases. *Transactions of the Royal Society of Tropical Medicine and Hygiene* **103**, 109–  
1120 121 (2009).
- 1121 31. D. A. T. Cummings, I. B. Schwartz, L. Billings, L. B. Shaw, D. S. Burke, Dynamic effects of  
1122 antibody-dependent enhancement on the fitness of viruses. *Proceedings of the National*  
1123 *Academy of Sciences* **102**, 15259–15264 (2005).
- 1124 32. B. Adams, *et al.*, Cross-protective immunity can account for the alternating epidemic pattern  
1125 of dengue virus serotypes circulating in Bangkok. *Proceedings of the National Academy of*  
1126 *Sciences of the United States of America* **103**, 14234–9 (2006).
- 1127 33. K. L. McElroy, *et al.*, Endurance, refuge, and reemergence of dengue virus type 2, Puerto  
1128 Rico, 1986–2007. *Emerg. Infect. Dis.* **17**, 64–71 (2011).
- 1129 34. C. V. F. Carrington, J. E. Foster, O. G. Pybus, S. N. Bennett, E. C. Holmes, Invasion and  
1130 maintenance of Dengue virus type 2 and type 4 in the Americas. *Journal of Virology* **79**,  
1131 14680–14687 (2005).
- 1132 35. L. C. Katzelnick, *et al.*, Antigenic evolution of dengue viruses over 20 years. *Science* (2021).
- 1133 36. H. Salje, *et al.*, Dengue diversity across spatial and temporal scales: Local structure and the  
1134 effect of host population size. *Science (New York, N.Y.)* **355**, 1302–1306 (2017).
- 1135 37. J. P. Messina, *et al.*, The current and future global distribution and population at risk of  
1136 dengue. *Nature Microbiology* **4**, 1508–1515 (2019).
- 1137 38. L. Cattarino, I. Rodriguez-Barraquer, N. Imai, D. A. T. Cummings, N. M. Ferguson, Mapping  
1138 global variation in dengue transmission intensity. *Science Translational Medicine* **12**,  
1139 eaax4144 (2020).

- 1140 39. N. M. Ferguson, C. A. Donnelly, R. M. Anderson, Transmission dynamics and epidemiology  
1141 of dengue: insights from age-stratified sero-prevalence surveys. *Proceedings of the Royal*  
1142 *Society B* **354**, 757–768 (1999).
- 1143 40. Hugo Muench, *Catalytic models in epidemiology*. (Harvard University Press, 1959).
- 1144 41. J. E. Manning, *et al.*, Development of inapparent dengue associated with increased  
1145 antibody levels to *Aedes aegypti* salivary proteins: A longitudinal dengue cohort in  
1146 Cambodia. *The Journal of Infectious Diseases* (2021) <https://doi.org/10.1093/infdis/jiab541>.
- 1147 42. J. A. Bohl, *et al.*, Discovering disease-causing pathogens in resource-scarce Southeast  
1148 Asia using a global metagenomic pathogen monitoring system. *Proceedings of the National*  
1149 *Academy of Sciences* **119**, e2115285119 (2022).
- 1150 43. S. N. Wood, mgcv: GAMs and Generalized Ridge Regression for R. *R News* **1/2**, 20–24  
1151 (2001).
- 1152 44. NOAA: National Weather Service *Climate Prediction Scener: Cold & Warm Episodes by*  
1153 *Season* (2023).
- 1154 45. A. D. Becker, B. T. Grenfell, TSIR: An R package for time-series susceptible-infected-  
1155 recovered models of epidemics. *PLoS ONE* **12**, 1–10 (2017).
- 1156 46. O. N. Bjornstad, B. F. Finkenstadt, B. T. Grenfell, Dynamics of measles epidemics:  
1157 Estimating scaling of transmission rates using a times series SIR model. *Ecological*  
1158 *Monographs* **72**, 169–184 (2002).
- 1159 47. B. T. Grenfell, O. N. Bjornstad, B. F. Finkenstadt, Dynamics of measles epidemics: Scaling  
1160 noise, determinism, and predictability with the TSIR Model. *Ecological Monographs* **72**,  
1161 185–202 (2002).
- 1162 48. R. E. Baker, A. S. Mahmud, C. J. E. Metcalf, Dynamic response of airborne infections to  
1163 climate change: predictions for varicella. *Climatic Change* **148**, 547–560 (2018).
- 1164 49. R. J. Oidman, *et al.*, Inter-annual variation in seasonal dengue epidemics driven by multiple  
1165 interacting factors in Guangzhou, China. *Nature Communications* **10** (2019).
- 1166 50. N. A. Rehman, *et al.*, Quantifying the localized relationship between vector containment  
1167 activities and dengue incidence in a real-world setting: A spatial and time series modelling  
1168 analysis based on geo-located data from Pakistan. *PLoS Neglected Tropical Diseases* **14**,  
1169 1–22 (2020).
- 1170 51. M. U. G. Kraemer, *et al.*, Big city, small world: density, contact rates, and transmission of  
1171 dengue across Pakistan. *J. R. Soc. Interface.* **12**, 20150468 (2015).
- 1172 52. M. U. G. Kraemer, *et al.*, Inferences about spatiotemporal variation in dengue virus  
1173 transmission are sensitive to assumptions about human mobility: a case study using  
1174 geolocated tweets from Lahore, Pakistan. *EPJ Data Science* **7** (2018).
- 1175 53. C. E. Wagner, *et al.*, Climatological, virological and sociological drivers of current and  
1176 projected dengue fever outbreak dynamics in Sri Lanka. *Journal of the Royal Society*  
1177 *Interface* **17** (2020).
- 1178 54. Roesch, Angi, Schmidbauer, Harald, WaveletComp: Computational Wavelet Analysis. R  
1179 package version 1.1. (2018).
- 1180 55. J. Phadungsombat, *et al.*, Emergence of genotype cosmopolitan of dengue virus type 2 and  
1181 genotype III of dengue virus type 3 in Thailand. *PLoS ONE* **13**, 1–26 (2018).
- 1182 56. V. T. Tran, *et al.*, Reemergence of Cosmopolitan genotype dengue virus serotype 2,  
1183 southern Vietnam. *Emerg. Infect. Dis.* **29** (2023).

- 1184 57. A. Wijewickrama, *et al.*, Emergence of a Dengue virus serotype 2 causing the largest ever  
1185 dengue epidemic in Sri Lanka. *bioRxiv* (2018) <https://doi.org/10.1101/329318>.
- 1186 58. H. A. Tissera, *et al.*, Severe dengue epidemic, Sri Lanka, 2017. *Emerg. Infect. Dis.* **26**, 682–  
1187 691 (2020).
- 1188 59. A. J. Drummond, M. A. Suchard, D. Xie, A. Rambaut, Bayesian phylogenetics with BEAUti  
1189 and the BEAST 1.7. *Molecular Biology and Evolution* **29**, 1969–1973 (2012).
- 1190 60. R. Bouckaert, *et al.*, BEAST 2: A software platform for Bayesian evolutionary analysis.  
1191 *PLoS Computational Biology* **10** (2014).
- 1192 61. K. Poltep, *et al.*, Genetic diversity of dengue virus in clinical specimens from Bangkok,  
1193 Thailand, during 2018–2020: Co-circulation of all four serotypes with multiple genotypes  
1194 and/or clades. *Tropical Medicine and Infectious Disease* **6** (2021).
- 1195 62. P. Klepac, H. Caswell, The stage-structured epidemic: Linking disease and demography  
1196 with a multi-state matrix approach model. *Theoretical Ecology* **4**, 301–319 (2011).
- 1197 63. C. J. E. Metcalf, *et al.*, Structured models of infectious disease: Inference with discrete data.  
1198 *Theoretical Population Biology* **82**, 275–282 (2012).
- 1199 64. P. Klepac, *et al.*, Stage-structured transmission of phocine distemper virus in the Dutch  
1200 2002 outbreak. *Proceedings. Biological sciences / The Royal Society* **276**, 2469–2476  
1201 (2009).
- 1202 65. M. Tipayamongkhogul, C.-T. Fang, S. Klinchan, C.-M. Liu, C.-C. King, Effects of the El  
1203 Niño–Southern Oscillation on dengue epidemics in Thailand, 1996–2005. *BMC Public Health*  
1204 **9**, 422 (2009).
- 1205 66. A. Gagnon, A. Bush, K. Smoyer-Tomic, Dengue epidemics and the El Niño Southern  
1206 Oscillation. *Clim. Res.* **19**, 35–43 (2001).
- 1207 67. World Bank, Cambodia. *World Development Indicators* (2021) (April 12, 2022).
- 1208 68. I. A. Sampson, G. M. Miles, E. Piano, “Undocumented, unregistered and invisible”: an  
1209 exploratory study of the reasons for and effects of migrating to Thailand of Cambodian  
1210 young people. *IJSSP* **41**, 862–874 (2021).
- 1211 69. L. Lambrechts, *et al.*, Dengue-1 virus clade replacement in Thailand associated with  
1212 enhanced mosquito transmission. *Journal of Virology* **86**, 1853–1861 (2012).
- 1213 70. J. G. de Jesus, *et al.*, Genomic detection of a virus lineage replacement event of dengue  
1214 virus serotype 2 in Brazil, 2019. *Memorias do Instituto Oswaldo Cruz* **115** (2020).
- 1215 71. K. Suzuki, *et al.*, Genotype replacement of dengue virus type 3 and clade replacement of  
1216 dengue virus type 2 genotype Cosmopolitan in Dhaka, Bangladesh in 2017. *Infection,  
1217 Genetics and Evolution* **75** (2019).
- 1218 72. L. C. Katzelnick, *et al.*, Dengue viruses cluster antigenically but not as discrete serotypes.  
1219 *Science* **349**, 1338–1343 (2015).
- 1220 73. A. F. Brito, *et al.*, Lying in wait: the resurgence of dengue virus after the Zika epidemic in  
1221 Brazil. *Nature Communications* **12**, 1–13 (2021).
- 1222 74. T. Tsheten, *et al.*, Epidemiological analysis of the 2019 Dengue epidemic in Bhutan.  
1223 *International Journal of Environmental Research and Public Health* **18**, 1–13 (2021).
- 1224 75. M. S. Hossain, *et al.*, Dengue in a crowded megacity: Lessons learnt from 2019 outbreak in  
1225 Dhaka, Bangladesh. *PLoS Neglected Tropical Diseases* **14**, 1–5 (2020).
- 1226 76. A. Ahsan, N. Haider, R. Kock, C. Benfield, Possible drivers of the 2019 Dengue outbreak in  
1227 Bangladesh: the need for a robust community-level surveillance system. *Journal of Medical  
1228 Entomology* **58**, 37–39 (2021).

- 1229 77. R. Rico-Hesse, *et al.*, Origins of Dengue type 2 viruses associated with increased  
1230 pathogenicity in the Americas. *Virology* **230**, 244–251 (1997).
- 1231 78. J. Lourenço, M. Recker, Viral and epidemiological determinants of the invasion dynamics of  
1232 Novel Dengue Genotypes. *PLoS Neglected Tropical Diseases* **4** (2010).
- 1233 79. Copernicus Climate Change Service Climate Data Store (CDS): Copernicus Climate  
1234 Change Service (C3S), ERA5: Fifth generation of ECMWF atmospheric reanalyses of the  
1235 global climate. (2017) (March 1, 2023).
- 1236 80. AmeriGEOSS Community Platform DataHub., Cambodia Admin Boundaries Level 1 (2023).
- 1237 81. H. Salje, *et al.*, Reconstructing unseen transmission events to infer dengue dynamics from  
1238 viral sequences. *Nature Communications*, 1–10 (2021).
- 1239 82. R. E. Baker, *et al.*, Epidemic dynamics of respiratory syncytial virus in current and future  
1240 climates. *Nat Commun* **10**, 5512 (2019).
- 1241 83. E. A. Mordecai, *et al.*, Detecting the impact of temperature on transmission of Zika, dengue,  
1242 and chikungunya using mechanistic models. *PLoS Negl Trop Dis* **11**, e0005568 (2017).
- 1243 84. B. T. Grenfell, R. M. Anderson, The estimation of age-related rates of infection from case  
1244 notifications and serological data. *The Journal of Hygiene* **95**, 419–36 (1985).
- 1245 85. L. W. Pomeroy, *et al.*, Serotype-specific transmission and waning immunity of endemic foot-  
1246 and-mouth disease virus in Cameroon. *PLoS ONE* **10**, 1–16 (2015).
- 1247 86. G. H. Long, *et al.*, Identifying the age cohort responsible for transmission in a natural  
1248 outbreak of *Bordetella bronchiseptica*. *PLoS Pathogens* **6** (2010).
- 1249 87. D. M. Heisey, D. O. Joly, F. Messier, The fitting of general force-of-infection models to  
1250 wildlife disease prevalence data. *Ecology* **87**, 2356–2365 (2006).
- 1251 88. K. L. Kalantar, *et al.*, IDseq-An open source cloud-based pipeline and analysis service for  
1252 metagenomic pathogen detection and monitoring. *GigaScience* **9**, 1–14 (2021).
- 1253 89. ARTIC-network, The ARTIC field bioinformatics pipeline (2021) (July 10, 2021).
- 1254 90. K. Katoh, J. Rozewicki, K. D. Yamada, MAFFT online service: Multiple sequence alignment,  
1255 interactive sequence choice and visualization. *Briefings in Bioinformatics* **20**, 1160–1166  
1256 (2018).
- 1257 91. Di. Darriba, *et al.*, ModelTest-NG: A new and scalable tool for the selection of DNA and  
1258 protein evolutionary models. *Molecular Biology and Evolution* **37**, 291–294 (2020).
- 1259 92. A. A. Sall, *et al.*, Yellow fever virus exhibits slower evolutionary dynamics than dengue  
1260 virus. *Journal of Virology* **84**, 765–772 (2010).
- 1261 93. G. Yu, D. K. Smith, H. Zhu, Y. Guan, T. T. Y. Lam, Ggtree: an R Package for visualization  
1262 and annotation of phylogenetic trees with their covariates and other associated data.  
1263 *Methods in Ecology and Evolution* **8**, 28–36 (2017).
- 1264 94. A. M. Kozlov, D. Darriba, T. Flouri, B. Morel, A. Stamatakis, RAxML-NG: A fast, scalable  
1265 and user-friendly tool for maximum likelihood phylogenetic inference. *Bioinformatics* **35**,  
1266 4453–4455 (2019).
- 1267 95. J. Felsenstein, Confidence limits on phylogenies: An approach using the bootstrap.  
1268 *Evolution* **39**, 783–791 (1985).
- 1269 96. N. D. Pattengale, M. Alipour, O. R. P. Bininda-Emonds, B. M. E. Moret, A. Stamatakis, How  
1270 many bootstrap replicates are necessary? *Journal of Computational Biology* **17**, 337–354  
1271 (2010).
- 1272 97. United Nations, United Nations Department of Economic and Social Affairs: Population by  
1273 Age Groups–Both Sexes. (2022).

1274 98. United Nations, United Nations Department of Economic and Social Affairs: Deaths by  
1275 Single Age - Both Sexes. (2022).

1276

1277



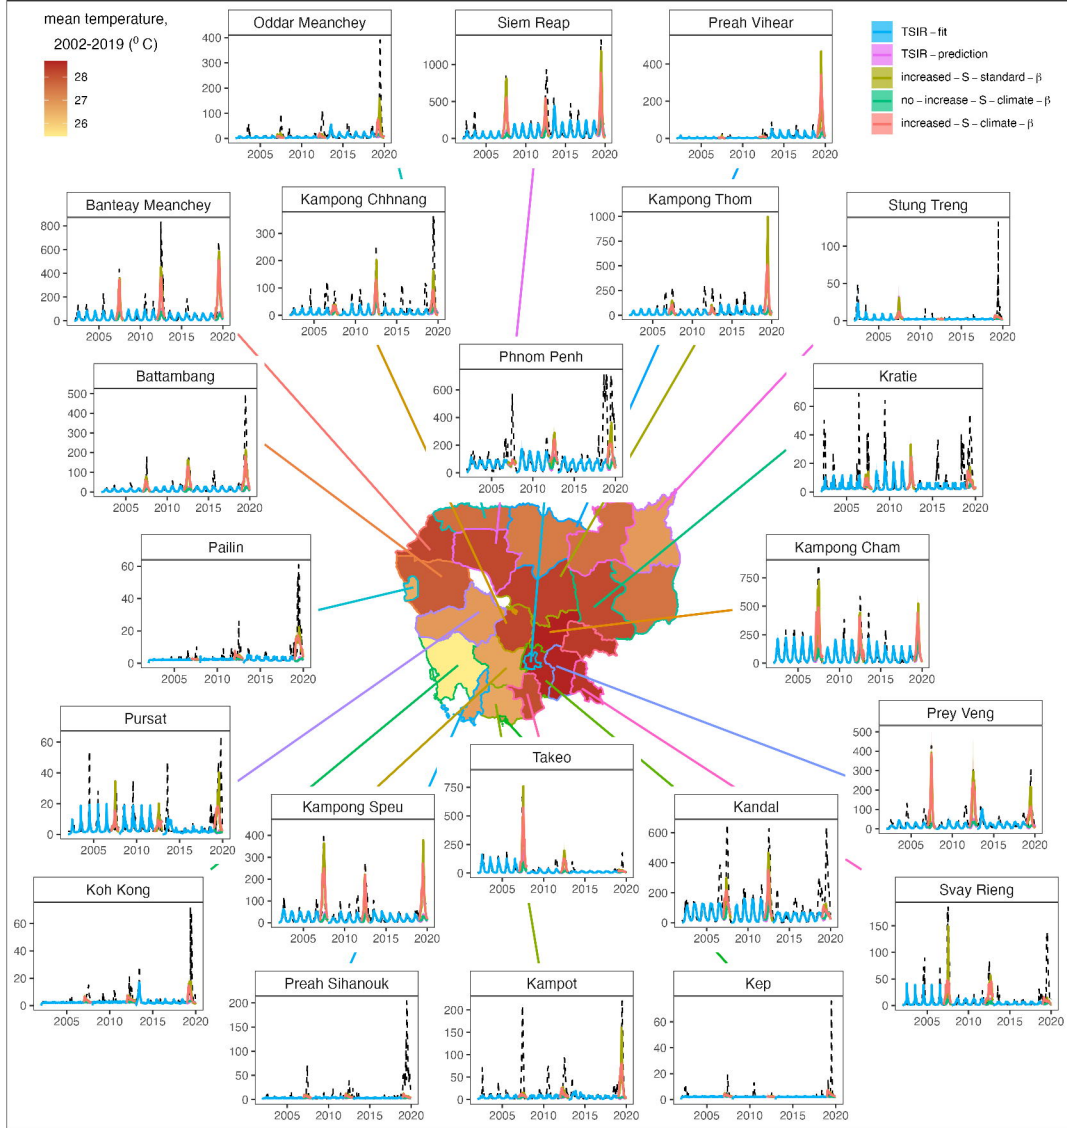

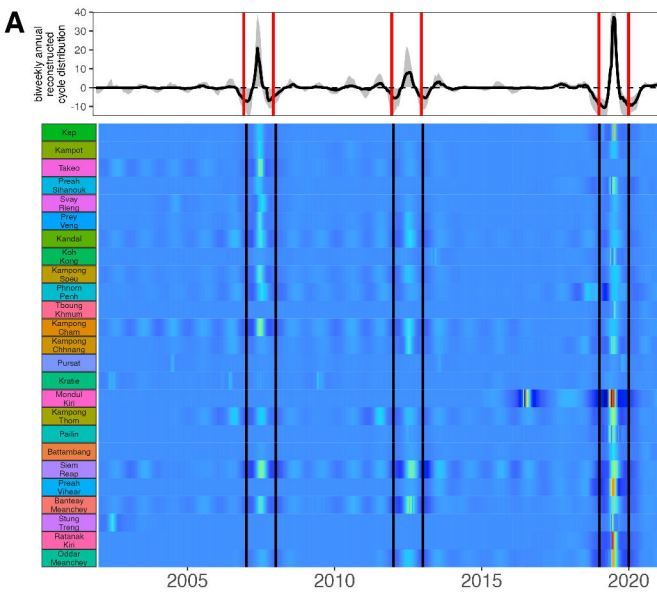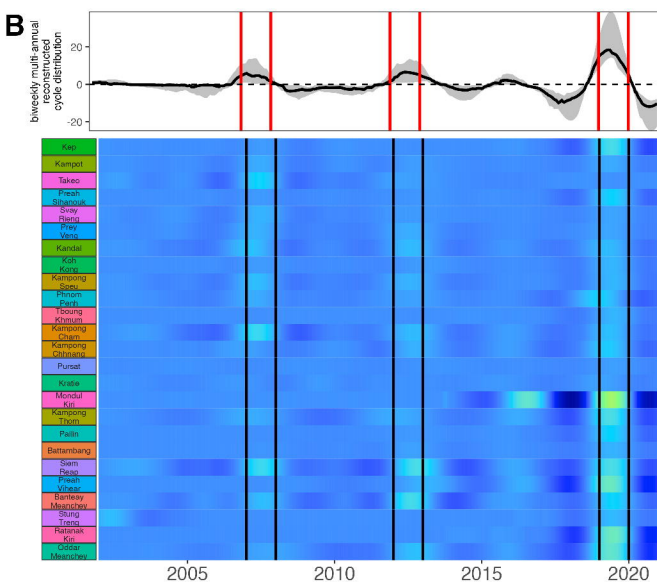

Reconstructed cycles  
(top: annual; bottom: multi-annual)

-100 0 100 200

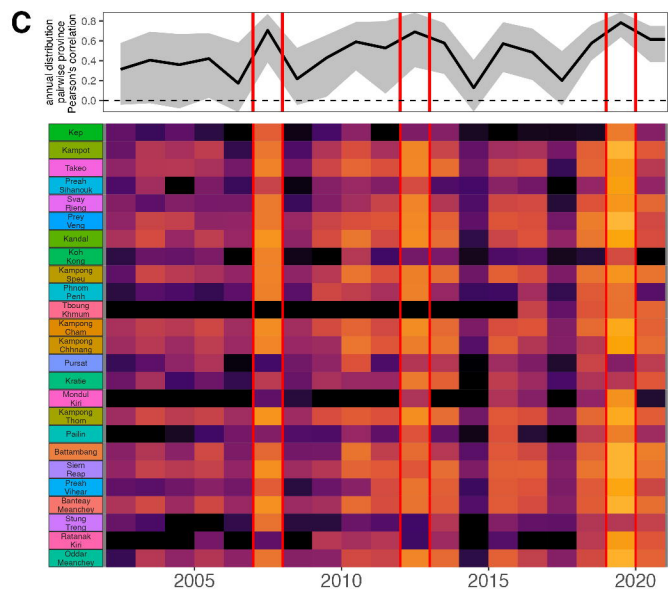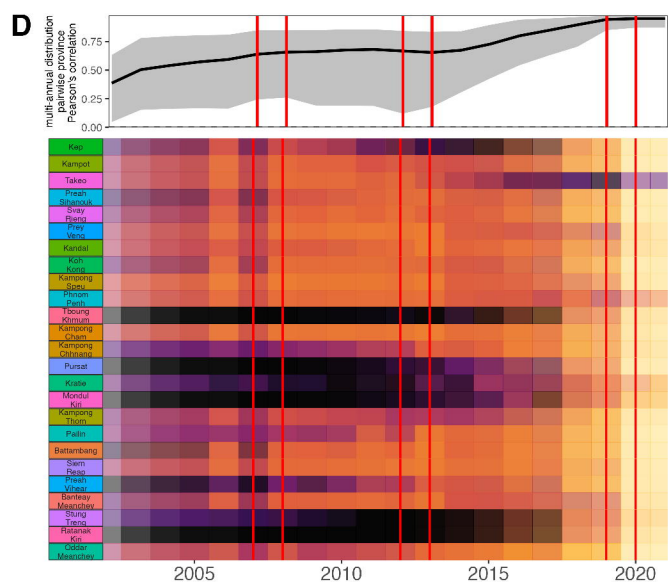

Average pairwise province Pearson's correlation  
(top: annual; bottom: multi-annual)

0.00 0.25 0.50 0.75 1.00

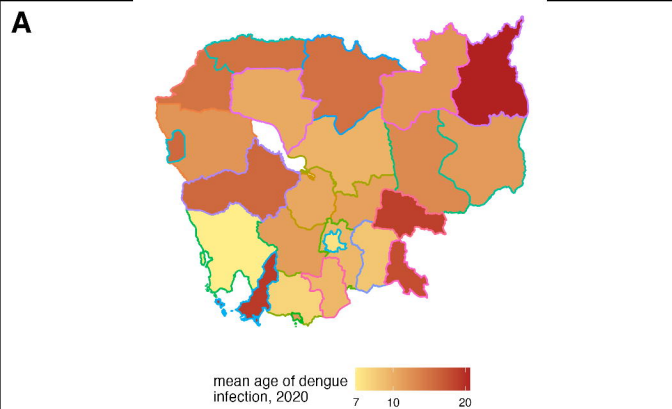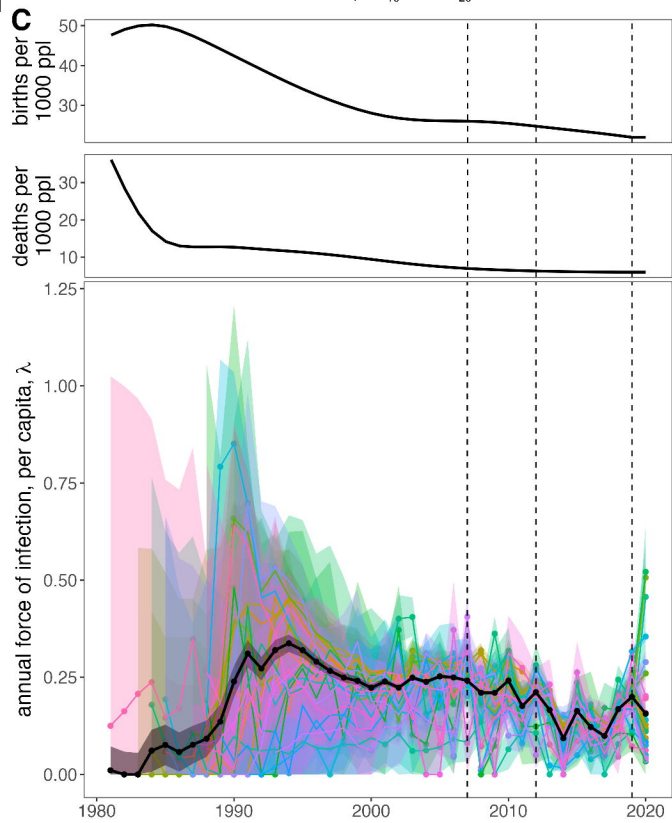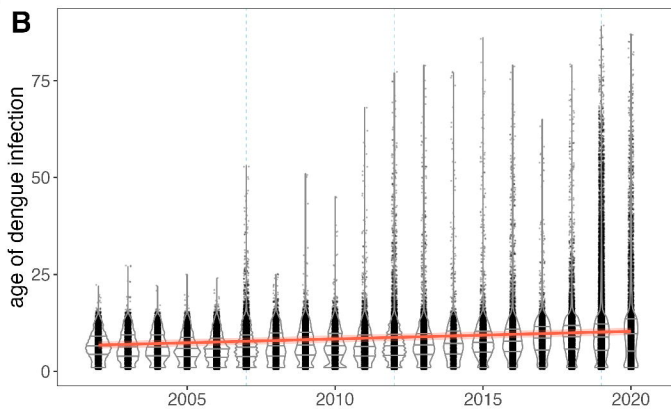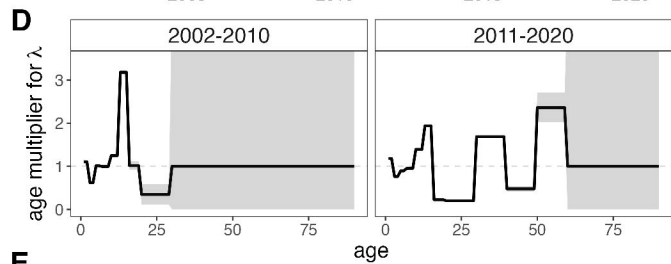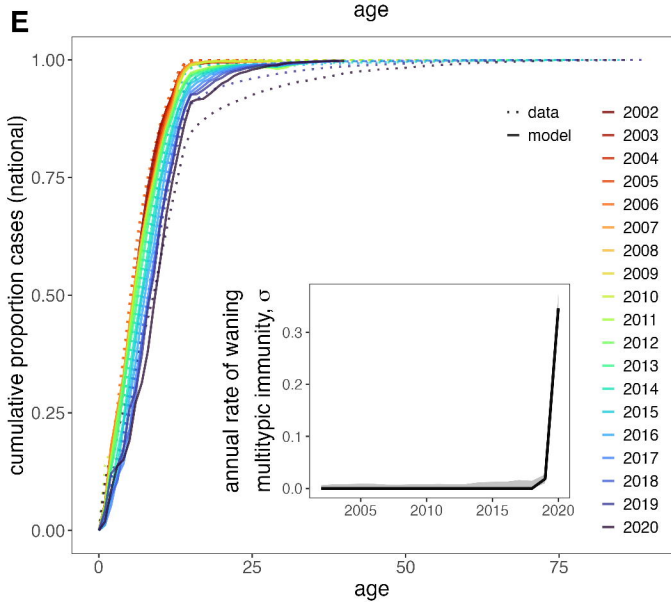

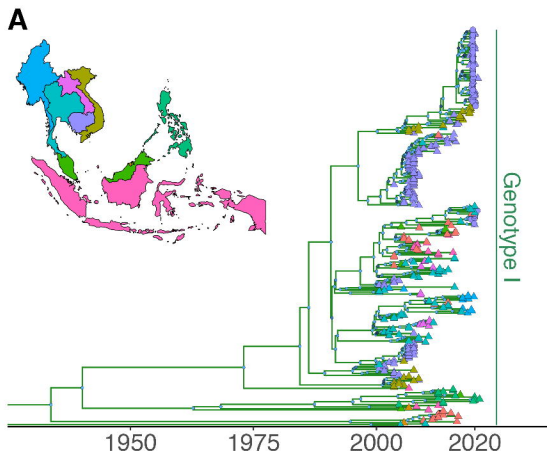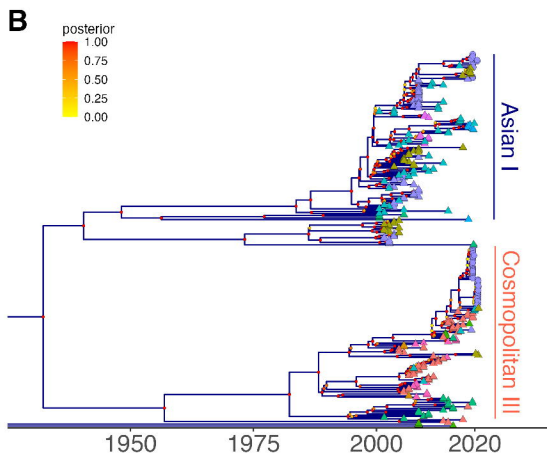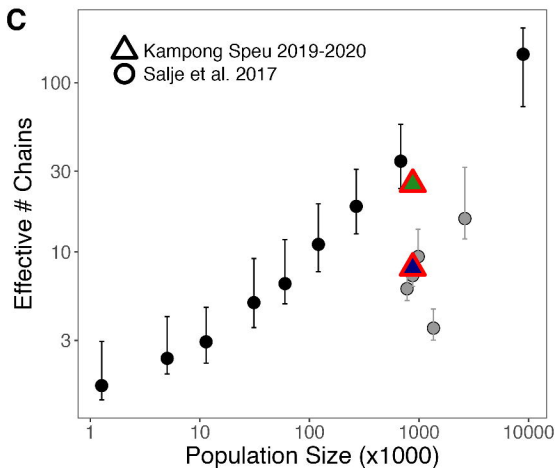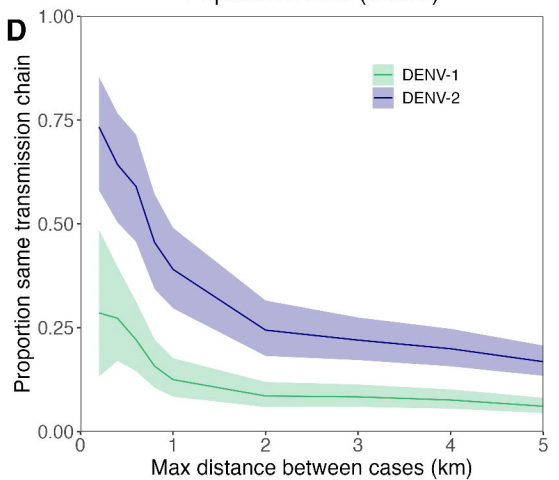

Source: https://www.medrxiv.org/content/10.1101/2022.06.08.22276171v3.full.pdf
