# 1 Main Manuscript for

## 2 3 **Climate, demography, immunology, and virology combine to drive two decades of** 4 **dengue virus dynamics in Cambodia**

5  
6 Cara E. Brook<sup>1\*</sup>, Carly Rozins<sup>2</sup>, Jennifer A. Bohl<sup>3</sup>, Vida Ahyong<sup>4</sup>, Sophana Chea<sup>5</sup>, Liz  
7 Fahsbender<sup>6</sup>, Rekol Huy<sup>7</sup>, Sreyngim Lay<sup>5</sup>, Rithea Leang<sup>7</sup>, Yimei Li<sup>1</sup>, Chanthap Lon<sup>5</sup>, Somnang  
8 Man<sup>5,7</sup>, Mengheng Oum<sup>5</sup>, Graham R. Northrup<sup>8</sup>, Fabiano Oliveira<sup>3</sup>, Andrea R. Pacheco<sup>5</sup>, Daniel  
9 M. Parker<sup>9,10</sup>, Katherine Young<sup>11</sup>, Michael Boots<sup>12</sup>, Cristina M. Tato<sup>4</sup>, Joseph L. DeRisi<sup>4</sup>, Christina  
10 Yek<sup>3</sup>, Jessica E. Manning<sup>3,5</sup>

### 11 12 **Affiliations:**

13 <sup>1</sup> Department of Ecology and Evolution, University of Chicago, Chicago, Illinois, USA

14 <sup>2</sup> Department of Science and Technology Studies, York University, Toronto, Canada

15 <sup>3</sup> Laboratory of Malaria and Vector Research, National Institute of Allergy and Infectious  
16 Diseases, National Institutes of Health, Rockville, Maryland, USA

17 <sup>4</sup> Chan Zuckerberg Biohub, San Francisco, California, USA

18 <sup>5</sup> International Center of Excellence in Research, National Institute of Allergy and Infectious  
19 Diseases, National Institutes of Health, Phnom Penh, Cambodia

20 <sup>6</sup> Chan Zuckerberg Initiative, San Francisco, California, USA

21 <sup>7</sup> National Center for Parasitology, Entomology, and Malaria Control, Phnom Penh, Cambodia

22 <sup>8</sup> Center for Computational Biology, University of California, Berkeley, California, USA

23 <sup>9</sup> Department of Population Health and Disease Prevention, University of California, Irvine,  
24 California, USA

25 <sup>10</sup> Department of Epidemiology and Biostatistics, University of California, Irvine, California, USA

26 <sup>11</sup> Department of Biological Sciences, University of Texas, El Paso, Texas, USA

27 <sup>12</sup> Department of Integrative Biology, University of California, Berkeley, California, USA

28  
29 \*Corresponding author: Cara E. Brook

30 **Email:** cbrook@uchicago.edu

31  
32 **Author Contributions:** CEB and JEM conceived the study. JEM, JAB, HR, RL, and SC carried  
33 out the febrile surveillance study and collected samples for mNGS in 2019. VA, CMT, JLD, JAB,  
34 SC, SL, CY, OM, SM, and JEM carried out RT-qPCR to identify dengue-positive samples, as well  
35 as library preparation and mNGS for raw sequencing. Other ancillary demographic data collection  
36 and analyses were performed by RL, KS, CY, FO, and ARP. DP, CL, and JEM set up geospatial  
37 system for patients. CEB and JAB generated consensus dengue genomes for upload to NCBI.  
38 KY and CEB downloaded climate data. CEB carried out TSIR, FOI, and simulation modeling, as  
39 well as all phylogenetic analyses, with help from YL, GN, and MB. CEB and JEM wrote the first  
40 draft of the manuscript. All authors approved and contributed to subsequent drafts of the  
41 manuscript and agree with the results presented.

42  
43 **Competing Interest Statement:** No competing interests.

44 **Classification:** Biological Sciences / Genetics

45 **Keywords:** dengue, genomic epidemiology, force of infection, wavelet decomposition, arbovirus

46 **This PDF file includes:**

47 Main Text

48 Figures 1 to 5

49

50 **Abstract**

51 The incidence of dengue virus disease has increased globally across the past half-century, with  
52 highest number of cases ever reported in 2019. We analyzed climatological, epidemiological, and  
53 phylogenomic data to investigate drivers of two decades of dengue virus disease in Cambodia,  
54 an understudied endemic setting. Using epidemiological models fit to a 19-year dataset, we first  
55 demonstrate that climate-driven transmission alone is insufficient to explain three epidemics  
56 across the time series. We then use wavelet decomposition to highlight enhanced annual and  
57 multiannual synchronicity in dengue cycles between provinces in epidemic years, suggesting a  
58 role for climate in homogenizing dynamics across space and time. Assuming reported cases  
59 correspond to symptomatic secondary infections, we next use an age-structured catalytic model  
60 to capture a trend of declining force of dengue infection through time, which drives observed  
61 patterns of increasing mean age of infection in Cambodia. Reported cases in >70 year-old  
62 individuals in epidemic years are best explained when additionally allowing for waning multitypic  
63 immunity and repeat symptomatic infections in older cohorts. We support this work with time-  
64 resolved phylogenetic trees incorporating 122 dengue virus (DENV) genomes sequenced in the  
65 2019-2020 epidemic, which document introduction of DENV-2 Cosmopolitan genotype into  
66 Cambodia, yielding localized transmission and decreased genomic diversity compared to  
67 endemic DENV-1. Finally, we simulate an age-structured, mechanistic model of dengue dynamics  
68 to demonstrate how introduction of a genetically distinct lineage into a population with waning  
69 multitypic immunity could drive repeat infections within a serotype in older-age individuals and  
70 recover patterns from reported data.

71

72 **Clinical Trial Numbers:** NCT04034264 and NCT03534245.

73

74 **Significance Statement**

75 The year 2019 witnessed the highest number of dengue cases ever reported, including in  
76 Cambodia, a Southeast Asian country with endemic transmission. We analyzed two decades of  
77 national dengue surveillance data for Cambodia to demonstrate how increasing temperature and  
78 precipitation enhance spatiotemporal synchronicity in epidemic years. We document how twenty  
79 years of demographic transition has increased the age of dengue infection and correspondingly  
80 depressed the force of infection through time. We show that introduction of a divergent DENV-2  
81 genotype in Cambodia in 2019 likely drove repeated symptomatic infections in older-age  
82 individuals that contributed to a high burden epidemic. As climates warm, we are likely to see  
83 more synchronized dynamics globally and a shifting burden of symptomatic disease into older  
84 cohorts.

85

86

87

88

89

90 **MAIN TEXT**

91

92 **INTRODUCTION**

93 Dengue virus (DENV) transmission has increased dramatically over the past two  
94 decades, culminating in the year 2019 with the highest number of global cases ever reported  
95 (>5.2 million) to the World Health Organization (WHO) (1). Since nearly three-quarters of DENV  
96 infections are estimated to be clinically inapparent (thereby unreported), these counts represent a  
97 vast underestimate of the true scale of dengue burden on public health systems (2). DENV is a  
98 flavivirus primarily transmitted by the *Aedes aegypti* mosquito, an ubiquitous arthropod vector in  
99 tropical and subtropical regions (2). DENV is comprised of four antigenically distinct serotypes—  
100 each of which is further subdivided among four to seven distinct genotypes; infection with one  
101 serotype is thought to result in lifelong immunity to that same serotype (homotypic immunity) but  
102 only temporary (up to two-year) protection against different serotypes (heterotypic immunity) (3).  
103 Heterotypic secondary infections are often more clinically severe due to an interaction with pre-  
104 existing flavivirus-specific antibodies known as antibody-dependent enhancement (ADE) (4, 5). In  
105 regions with multiple circulating endemic flaviviruses, this interplay makes the dynamics of  
106 dengue difficult to interpret at local, subnational, or national levels. Dynamical inference is further  
107 challenged by the multifaceted disease ecology characteristic of any arbovirus—for which  
108 infections are also impacted by changes in human land use, behavior, or movement, as well as  
109 the distribution and abundance of arthropod vectors. Nonetheless, national health systems in  
110 DENV-endemic regions rely on mathematical models to inform resource allocation on a year-to-  
111 year basis—ranging from vector control to hospital capacity for supportive care, given no  
112 currently available treatments for dengue. Improved understandings of the drivers of dengue  
113 transmission are therefore crucial for public health efforts, especially in resource-scarce settings.

114 Southeast Asia (SEA) represents ~70% of global reported dengue cases (1).  
115 Surprisingly, while dengue is largely classified as an urban disease, only 46% of the SEA  
116 population is considered urban. For most SEA countries, roughly 35-55% of the total population is  
117 concentrated in urban areas co-localizing with the highest dengue burdens; Singapore reports the  
118 largest urbanized population percentage in SEA (100%), while Cambodia—with 16 million  
119 people—reports the lowest (24%) (6). Like many SEA countries, Cambodia nonetheless exhibits  
120 significant peri-urban sprawl surrounding major metropolitan centers like the capital city, Phnom  
121 Penh (7, 8). Dengue was first detected in Cambodia in 1963 (9), though passive surveillance—via  
122 reporting of clinically diagnosed cases from public health centers and hospitals to the national  
123 level—was not adopted until 1980, following political instability and civil war in the late 1970s (10).  
124 In 2001, the National Dengue Control Program (NDCP) was inaugurated in Cambodia, and in  
125 2002, the NDCP formally adopted the WHO clinical case definitions of dengue and its  
126 complications as criteria for the surveillance program (10, 11). The NDCP surveillance system is  
127 largely limited to clinicosyndromic diagnoses, meaning that reported cases often correspond to  
128 more severe heterotypic secondary DENV infections (12), which are reported collectively without  
129 the ability to systematically distinguish between serotypes (11). Nonetheless, the NDCP also  
130 instituted some active surveillance efforts in Cambodia in 2001, which included limited virological  
131 testing to identify distinct serotypes at sentinel sites in four provinces, which were expanded to 15  
132 provinces by 2021 (10, 11).

133 Over the past two decades, all four dengue serotypes have been detected in Cambodia  
134 by virological surveillance (11), though cases have been largely dominated by one or two

135 serotypes in a given year—with DENV-1 and DENV-3 most common in the early 2000s and  
136 DENV-1 and DENV-2 predominant in the last decade (11). Cambodia witnessed three major  
137 dengue epidemics across this period—in 2007, 2012, and 2019 (11). The first epidemic, in 2007,  
138 occurred coincidentally with a genotype replacement event in DENV-1 (13, 14), though cases  
139 were dominated by DENV-3, marking the last year of this serotype’s dominance in the region (10,  
140 14). The second epidemic, in 2012, has been largely attributed to DENV-1 (11, 15–17), and the  
141 third, in 2019, appears to have been driven by co-circulation of both DENV-1 and DENV-2 (11).  
142 Consistent with the global dengue phenomenon of 2019 (1), Cambodia suffered its worst dengue  
143 epidemic on record in this year, with approximately 40,000 total cases reported across all 25  
144 provinces—a likely drastic underestimation of the true disease burden (18). Indeed, the past  
145 twenty years of surveillance in Cambodia have witnessed, on average, steadily increasing  
146 dengue incidence, coupled with a steady increase in the mean age of dengue infection (11). The  
147 latter has been anecdotally attributed to an aging population following demographic transition, as  
148 similar phenomena have been reported previously in neighboring Thailand (19, 20), as well as in  
149 Nicaragua (21).

150 Explosive periodic outbreaks are a hallmark of dengue virus disease, though the multiple  
151 drivers of these phenomena have long been debated (20, 22–28). Seasonal climate cycles are a  
152 strong predictor of annual cycling for many arboviruses, including dengue (29, 30), and climate  
153 has been implicated as a possible driver of multiannual dengue periodicity, as well. In Thailand,  
154 multiannual dengue cycles demonstrate coherence with El Niño phenomena (26), and epidemic  
155 years exhibit more synchronized dynamics across latitudes (26), as well as higher correlation with  
156 local temperature than do inter-epidemic periods (25). The interaction of demography and  
157 heterotypic immunity is also thought to play an important role in driving multiannual cycles for  
158 dengue (20, 22, 31, 32), which, in Thailand, show elongated periodicity as a result of declining  
159 birth rates and slower build-up of the susceptible population over the past half-century (20).  
160 Virology also plays a key role in many dengue epidemics, which have, historically, been linked to  
161 turnover in the dominant regional serotype (32–34) or to replacement of a dominant viral  
162 genotype with a serologically homotypic but phylogenetically divergent viral lineage (14, 35).  
163 Indeed, recent work links the magnitude of periodic dengue epidemics to antigenic evolution;  
164 large epidemics tend to result from the takeover of those DENV lineages most antigenically  
165 distinct from previously circulating strains of the same serotype or most antigenically similar to  
166 lineages of a different serotype (35).

167 The past two decades of changing dengue dynamics in Cambodia have taken place  
168 alongside extensive, rapid, heterogenous development across much of SEA, with significant peri-  
169 urban sprawl expanding beyond central mega-city limits and high-density population centers  
170 springing up around industry hubs (often factories) in otherwise rural areas (7, 8). Longitudinal  
171 phylodynamic studies of georeferenced DENV sequences from Thailand have demonstrated the  
172 importance of microscale transmission—particularly at the household level—in generating DENV  
173 diversity in urban Bangkok, predicting that DENV transmission will intensify as peri-urban settings  
174 in SEA become better connected (36). Nonetheless, investigations into the dynamical drivers of  
175 dengue transmission in rural and peri-urban settings have been limited to date. As climatic  
176 changes drive increases in the population at-risk for dengue infection in SEA and elsewhere (29,  
177 30, 37), better-designed active surveillance programs and improved targeting and evaluation of  
178 vector control interventions are greatly needed (38).

179 Here, we explore the dynamics of dengue virus transmission across the past two  
180 decades in peri-urban Cambodia, investigating the potential mechanisms that underly periodic  
181 epidemics, particularly the epidemic of 2019. We queried a 19-year dataset (2002-2020) of  
182 serotype-agnostic dengue case counts from the NDCP, aggregated at the province level, to, first,  
183 interrogate the role that climate played in driving epidemic spikes in 2007, 2012, and 2019, and  
184 second, more generally, explore the impact of climate on annual and multiannual cycling across  
185 the time series. We, third, fit catalytic models to the age-structured incidence of reported dengue  
186 disease to estimate the annual force of infection (FOI), at the province level, across this time  
187 series (20, 39, 40), then considered the national surveillance data in the context of our own active  
188 febrile surveillance study carried out in peri-urban Kampong Speu province from 2019-2020 (41).  
189 Whole genome sequencing of DENV from serum samples collected in part with our active  
190 surveillance program identified the first record of the DENV-2 Cosmopolitan lineage ever  
191 documented in Cambodia (42). Phylodynamic analysis of the spread of the DENV-2  
192 Cosmopolitan lineage in this region suggests that this new genotype drove pathogenic infections  
193 in older age individuals in 2019, contributing to the largest documented dengue outbreak on  
194 record for Cambodia. Finally, we constructed an age-structured discrete-time, dynamical model to  
195 simulate the interplay of climate, demography, immunology, and virology which combine to  
196 structure two decades of dengue dynamics in Cambodia.

197

## 198 RESULTS

### 199 **Though warmer than average, epidemic years were not major climate anomalies.**

200 Because of the widely acknowledged role of climate as a driver of arboviral disease  
201 globally (29, 30), coupled with recent work out of Thailand highlighting coherence between El  
202 Niño climate anomalies and dengue epidemics (26), we first explored the influence of changing  
203 temperature and precipitation on dengue caseload in Cambodia. To this end, we first aggregated  
204 high-resolution temperature and precipitation data at the Cambodian province level, across two-  
205 week intervals from 2002-2019 and sought to address the extent to which epidemic years  
206 represented climatic anomalies over this time period. We identified a characteristic annual  
207 variation in both temperature and precipitation, which was largely recapitulated across provinces  
208 and years. Temperature peaked in the first half of each year, between April and July, consistently  
209 across all provinces and preceding the peak in dengue caseload (Fig. S1). Precipitation peaked  
210 in the latter half of each year, between August and October (Fig. S2). Generalized additive  
211 modeling (GAMs) (43) demonstrated that, after controlling for intra-annual variation, temperature  
212 has increased significantly across the past two decades in all provinces; no significant interannual  
213 changes were detected for precipitation (Fig. S3-S4; Table S1). Additional GAMs and climate  
214 data normalized into z-scores indicated that the epidemic years of 2012 and 2019 were hotter  
215 than average for the time series, while 2007 was cooler, consistent with the observed interannual  
216 increase in temperature (Fig. S5). Years 2015-2016, which spanned a major El Niño event in  
217 SEA (but did not correspond to a dengue epidemic) (44), were also hotter than average. By  
218 contrast, 2007 had higher-than-average precipitation, while 2019 had lower-than-average  
219 precipitation, and 2012 did not deviate from the mean; in the years preceding all three major  
220 dengue epidemics, precipitation was not significantly different from average (Fig. S6). We  
221 concluded that, while both temperature and dengue incidence increased across our time series,  
222 epidemic years were not characterized by any remarkably aberrant climatic profile.

223

224 **Climate-informed transmission rates failed to recover epidemic dynamics in a TSIR model.**

225 To more mechanistically interrogate the role of climate as a driver of dengue epidemics in  
226 Cambodia, we developed a simple, climate-informed time series Susceptible-Infected-Recovered  
227 (TSIR) model (45–48), which we fit to dengue case counts, aggregated over two week intervals at  
228 the province level, for the three inter-epidemic periods (2002–2006, 2008–2011, and 2013–2018).  
229 Though typically used to describe the transmission dynamics of perfectly immunizing childhood  
230 infections, such as measles (46, 47), TSIR has been applied to dengue dynamics previously and  
231 offers an effective means by which to isolate the impact of climate on transmission, despite  
232 oversimplifying the multiple serotype dynamics of dengue virus disease (49–53).

233 We used biweekly transmission rates recovered from TSIR fits to the inter-epidemic  
234 periods, as well as climate-informed transmission rates for epidemic years projected at the  
235 province level from lagged temperature and precipitation data, to predict epidemic-year cases  
236 (Fig. 1; *Methods*; *SI Appendix*). We found that TSIR successfully recaptured the timing of annual  
237 dengue epidemics across the 22 provinces considered, with the recovered transmission rate  
238 peaking between May and August, slightly preceding reported cases. The magnitude and timing  
239 of transmission varied by province and between the three inter-epidemic periods, showing no  
240 consistent pattern of directional change in magnitude with time (Table S2). TSIR-estimated  
241 transmission was significantly positively associated with higher temperature and precipitation  
242 (lagged, respectively, such that climate variables preceded transmission by a median 3.5 months  
243 for temperature and 1 month for precipitation) in the corresponding province across all inter-  
244 epidemic periods (Table S3–S4). More rapid transmission gains were observed for corresponding  
245 increases in temperature vs. precipitation (Fig. S7–S9; Table S4). Nonetheless, climate-informed  
246 transmission rates for epidemic years were not substantially different from rates fitted to inter-  
247 epidemic periods, reflecting the absence of major climate anomalies across the time series (Fig.  
248 S10).

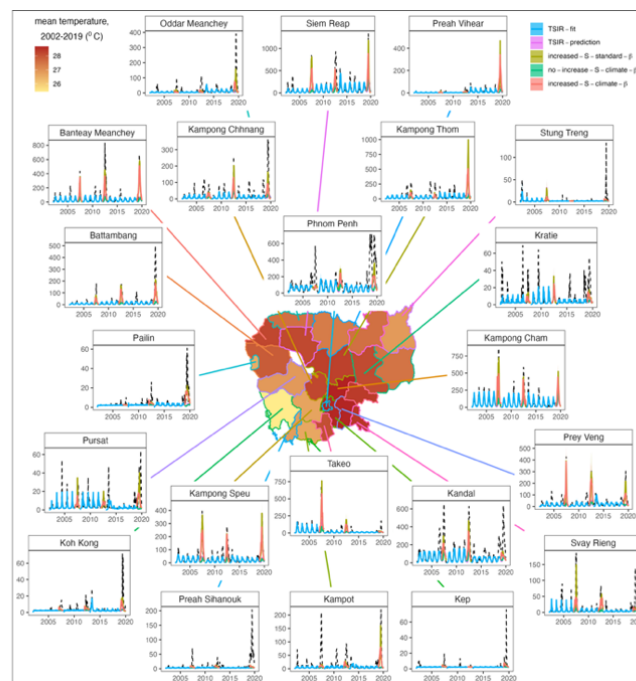

249 **Figure 1. Climate-informed TSIR insights into epidemic dynamics of DENV in Cambodia.** Inset panels show  
250 province level clinicosyndromic reported DENV cases (*dashed black lines*) with fitted TSIR output to the three inter-  
251

252 epidemic periods (2002-2006, 2008-2011, 2013-2018; *blue lines*) and TSIR projections for epidemic years (2007, 2012,  
253 2019) under trained biweekly transmission rate ( $\beta$ ) estimates (*pink lines*), incorporating a factorial increase in the  
254 susceptible population (*gold lines*), using a climate-projected  $\beta$  estimated from lagged temperature and precipitation data  
255 by province (*green lines*), or, finally, using both climate-projected  $\beta$  and a factorial increase in the susceptible population  
256 (*red lines*). Parameter estimates are available for viewing in *SI Appendix*, Table S2, S5. The center map shows province  
257 level administrative boundaries for Cambodia, shaded by the mean biweekly temperature from the 2020 climate data.  
258

259 Despite recovering the intra-annual timing of transmission, as expected, TSIR  
260 underpredicted the magnitude of epidemic year caseloads for all provinces (Fig. 1). Climate-  
261 informed transmission rates improved TSIR projections but still failed to recover epidemic peaks  
262 (Fig. 1). Inclusion of an amplification term in the susceptible population at the beginning of each  
263 epidemic year facilitated TSIR's recovery of the epidemic year caseloads (*Methods*) (53). In the  
264 absence of climate input into the transmission rate, the proportional increase in the susceptible  
265 population needed to recover the epidemic peak was a median 1.8x for 2007, 2.10x for 2012, and  
266 2.17x for 2019 (Table S5). The proportional increase in the susceptible population needed to  
267 recover the epidemic peak was not significantly lower when epidemic year cases were projected  
268 using climate-informed transmission rates for 2007 and 2012 (paired student's t-test: [2007]  
269  $t=0.33$ ,  $p>0.1$ ; [2012]  $t=-0.52$ ;  $p>0.1$ ) and only marginally lower for 2019 ( $t=1.31$ ,  $p=0.1$ ),  
270 suggesting (at most) a minimal role for temperature and precipitation in driving epidemic  
271 dynamics (Table S5). For many provinces, the combination of climate-informed transmission rate  
272 with susceptible augmentation still fell short of effectively capturing epidemic caseloads,  
273 highlighting the need for alternative explanations for these high transmission years.  
274  
275

## 276 **Wavelet analysis showed enhanced synchrony in dengue dynamics across provinces and** 277 **climate time series in epidemic years.**

278 Consistent with previous reports out of neighboring Thailand (26), wavelet decomposition  
279 of the biweekly dengue time series, at the province level, demonstrated statistically significant  
280 peaks in the amplitude and average wavelet power, of, respectively, both annual (Fig. 2A, S11A)  
281 and multiannual (Fig. 2B, S11B) cycles in dengue incidence during the three epidemic years (54).  
282 As also witnessed in Thailand (26), we observed significantly elevated synchronicity between  
283 provinces in the timing and amplitude of yearly dengue incidence, as measured both by pairwise  
284 Pearson's correlation coefficient (Fig. 2C) and cross-wavelet power (Fig. S11), in epidemic vs.  
285 non-epidemic years. Synchronicity in the annual incidence data was negatively associated with  
286 geographic distance between provinces, though patterns were less clear than have been  
287 previously described in neighboring regions (26) (Fig. S12). High synchronicity between annual  
288 case data for paired provinces was significantly positively associated with high temperature,  
289 precipitation, and population size of a focal province (Fig. S12; Table S6).  
290

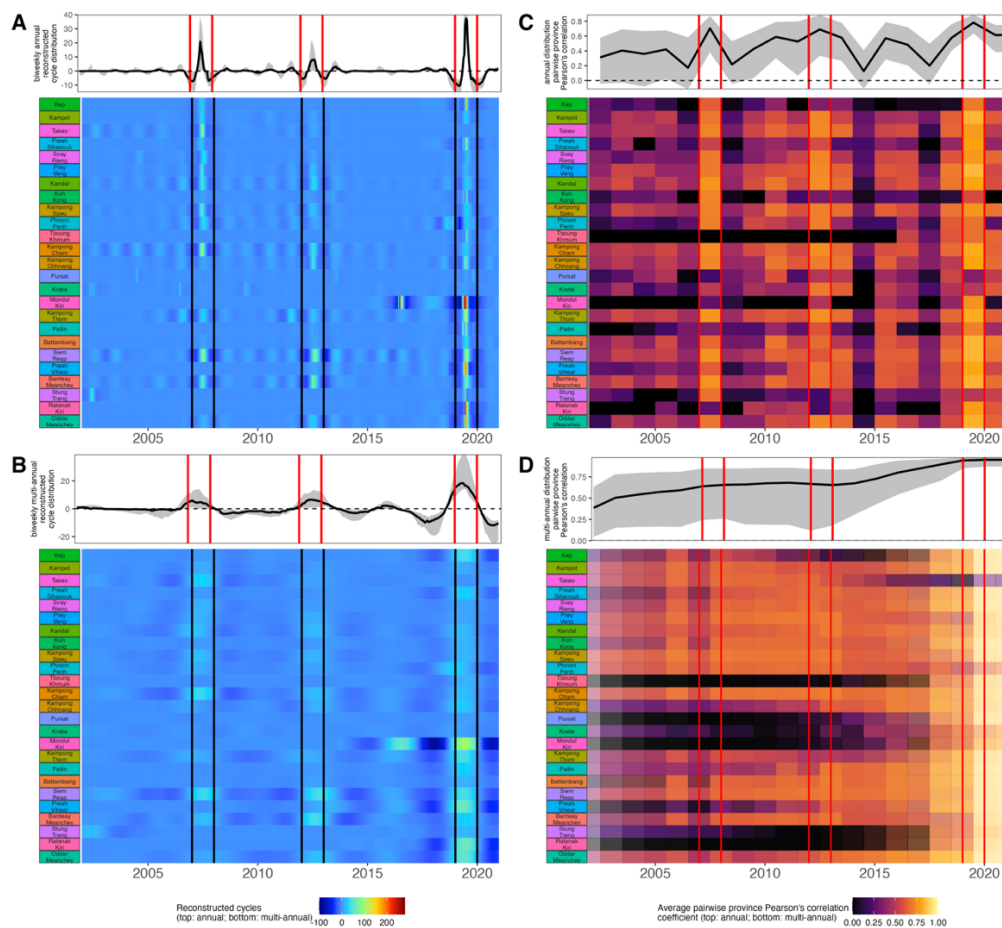

291  
292  
293  
294  
295  
296  
297  
298  
299  
300

**Figure 2. Wavelet reconstructions show heightened synchrony in epidemic years for Cambodian dengue.** Reconstructed **A** annual and **B** multiannual dengue cycles by province, by year from NDCP incidence per 100,000 population. **C** Mean pairwise Pearson's correlation coefficient ( $\rho$ ) for annual dengue incidence between focal province and all other provinces through time. **D** Mean  $\rho$  comparing province-to-province reconstructed multiannual dengue cycles across a 5-year sliding window, with overlapping window frames plotted (partially translucent) atop one another. In all panels, epidemic years are highlighted by vertical red or black bars. Top panels indicate the distribution of corresponding values (median = solid line; max-to-min range = gray shading) observed across all provinces within each timestep. X-axis labels are marked on January 1 of the corresponding year.

301 For multiannual cycles, we observed a trend of steadily increasing synchronicity (Fig. 2D)  
302 and cross-wavelet power (Fig. S11D) between provinces through time, though no peaks occurred  
303 in epidemic years. Again consistent with recent work from Thailand (25), cross-wavelet power  
304 between raw dengue incidence and the corresponding, province level mean temperature and  
305 total precipitation (grouped biweekly) peaked in epidemic years (Fig. S13 AB). At the multiannual  
306 scale, cross-wavelet power between province level reconstructed dengue cycles and the time  
307 series of temperature and precipitation largely increased across the time series (Fig. S13CD),  
308 though values were highest slightly preceding the 2019 epidemic and overlapping the 2015-2016  
309 El Niño event (44). The same pattern was observed when comparing monthly reconstructed  
310 multiannual dengue cycles and the Oceanic Niño Incidence (ONI), the monthly measure of El  
311 Niño activity (Fig. S13E). For temperature, precipitation, and ONI, cross-wavelet power with  
312 multiannual dengue cycles appeared to peak earlier in more southern provinces and move  
313 gradually northward over several years (Fig. S13DE). All told, wavelet analyses suggested a role



314 for climate in synchronizing annual dengue epidemics across provinces, but only minimal support  
 315 for a hypothesis of multiannual climate cycles driving periodic epidemics across our time series.  
 316 In contrast to reports from two decades prior in Thailand (20), the periodicity of multiannual  
 317 dengue cycles across provinces also did not increase in duration throughout our time series,  
 318 despite decreasing birth rates over the same period (Fig. S14). This perhaps reflects the relative  
 319 slowdown in both birth and death rate declines in Cambodia over the past two decades, when  
 320 compared with the dramatic declines witnessed twenty years prior (Fig. S14).

321

322 **Mean age of reported dengue infection increased across the study period, corresponding**  
 323 **to a declining force of infection.**

324 Previous work has reported a trend of increasing mean age of dengue infection across  
 325 the past two decades in Cambodia at the national level (11); we confirmed this to be consistent at  
 326 the province level, as well (Fig. 3A,B; Fig. S15; Table S7). At the national level, the mean age of  
 327 dengue infection increased from 6.79 years (95% CI: 5.85-7.72) in 2002 to 10.34 years (95% CI:  
 328 9.41-11.27) in 2020 ( $p < 0.001$ ). Increases in infection age were even more severe in more remote  
 329 provinces: in the distant northeastern province of Mondul Kiri, for example, the mean age of  
 330 infection increased from 3.72 years (95% CI: 1.97-5.47) in 2002 to 21.18 years (95% CI: 20.84-  
 331 21.53) in 2020 (Fig. 3A; Fig. S15; Table S7).

332

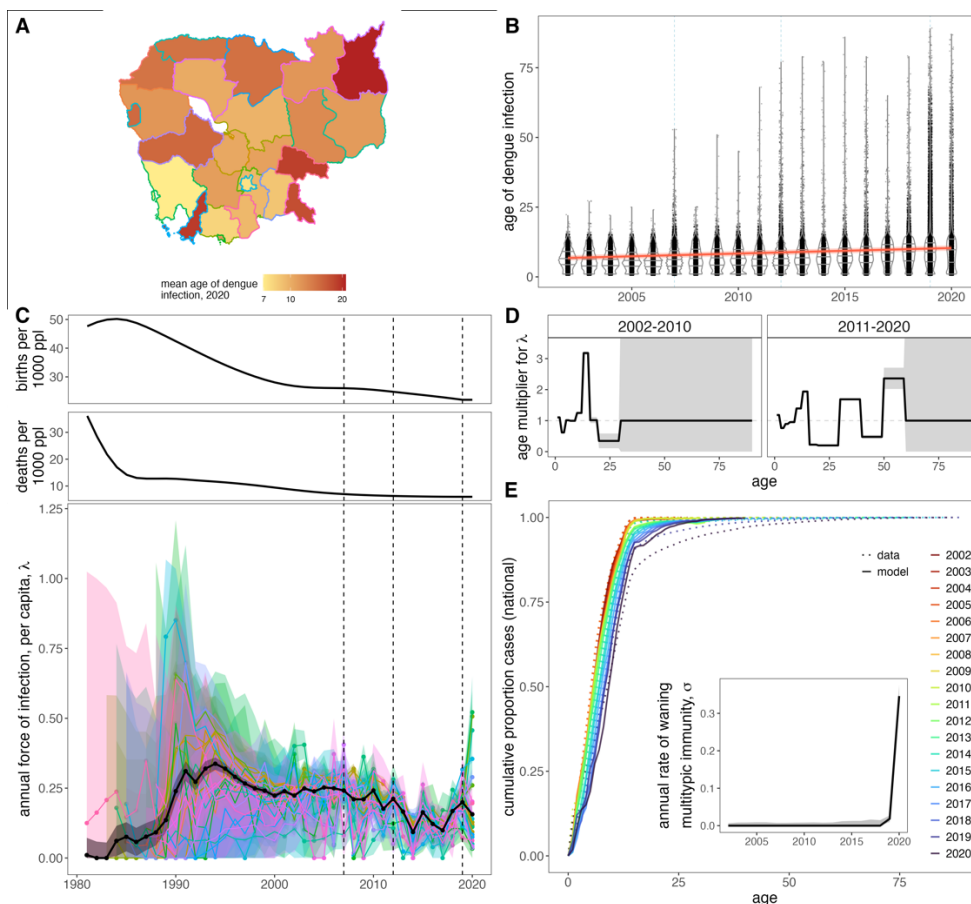

333  
 334  
 335

**Figure 3. Demographic transition underpins declining force of infection and increasing age of dengue incidence in Cambodia. A** Mean age of dengue infection, by province in the last year of the NDCP time series (2020). **B** Age

336 distribution of reported dengue cases by year, with violin plots highlighting changes in the interquartile range of cases.  
337 The interannual trend in the mean age of dengue infection is plotted as a solid red line, with 95% confidence intervals by  
338 standard error shown as a narrow, translucent band behind it (Table S7). Epidemic years (2007, 2012, 2019) are  
339 highlighted by a light blue, dashed line in the background. **C** National (black) and province level (colored) estimates for the  
340 annual force of infection from 1981 (the birth year of the oldest individual in the first year of the NDCP time series) to  
341 2020. 95% confidence intervals from the hessian matrix are shown as translucent shading. FOI estimates are compared  
342 against national birth and death rates for Cambodia across the time series, with epidemic years highlighted by vertical  
343 dashed lines. **D** Age modifiers to the FOI fit as shared across all provinces for 2002-2010 and 2011-2020 subsets of the  
344 data, with 95% confidence intervals by profile likelihood shown as translucent shading (note that the likelihood profile was  
345 flat in age categories 30+ for years 2002-2010 and 60+ for years 2011-2020 so no FOI modification was applied here). **E**  
346 Cumulative increase in the proportion of cases by age at the national level, colored by year. Data are shown as dotted  
347 lines and model output as solid lines. Model includes national FOI estimates from **C**, age modification terms from **D**, and  
348 time-varying waning multitypic immunity as shown in the inset.  
349

350 To interrogate the mechanistic drivers of this pattern, we estimated the annual force of  
351 infection (FOI, or  $\lambda$ ), the rate at which susceptibles become infected, across provinces for every  
352 year in the dataset (2002-2020) and the 22 years preceding the onset of the time series, dating  
353 back to the birth year of the oldest individual in the first year of the data (Fig. 3C) (20, 39, 40). As  
354 in previous models for dengue (20, 39), we assumed that reported cases represented secondary,  
355 symptomatic infections more likely to report to public hospitals and clinics. Resulting patterns in  
356 FOI by province largely mirrored those recovered at the national level (Fig. S16), demonstrating a  
357 consistently high FOI in the early 1990s, roughly corresponding to the years in which individuals  
358 born in Cambodia's 1980s birth pulse (which followed severe population reductions resulting from  
359 civil war in the late 1970s) would likely be experiencing secondary infections. The FOI  
360 subsequently demonstrated a gradual decline across the time series, interspersed with minor  
361 local peaks during epidemic years.  
362

### 363 **Age-structured FOI modifications and waning multitypic immunity in 2019-2020 improved** 364 **the model's ability to recapture observed data.**

365 Inspired by previous studies in other systems (19–21), we next fit 26 (thirteen per  
366 decade) multiplicative age modification parameters, shared across all provinces and a subset of  
367 years, to allow for modulation of annual FOI across individuals in different age categories (Fig.  
368 3D). Incorporation of age modifiers improved model fits to the data across all provinces (Table  
369 S8). Consistent with recent work in Thailand (19), we identified a high hazard of infection in  
370 adolescents (13-15 year-olds) across the time series. In the second decade of the time series, we  
371 additionally noted an elevated age-specific hazard of infection in 30-39 year-olds and 50-59 year-  
372 olds, corresponding to reported symptomatic infections in older age individuals.

373 This support for elevated infection rates in older age individuals led us to revisit our  
374 assumption that reported cases corresponded to clinically apparent secondary infections only.  
375 Visualization of the age distribution of cases by year at both the national (Fig. 3B) and province  
376 levels (Fig. S15) indicated that, in addition to increases in the mean age of dengue infection, the  
377 past two decades of dengue incidence in Cambodia have also witnessed expansion in the age  
378 *range* of cases—such that approximately 1% of reported cases (712/68597) in 2019 occurred in  
379 individuals over the age of 45, with 61 infections reported in individuals >70 years in age. We also  
380 observed an isolated spike in the age distribution of cases in some provinces in the earlier  
381 epidemic years of 2007 and 2012 (Fig. S15). To allow for symptomatic infections in older age-  
382 individuals, we modified the two-serotype catalytic modeling framework presented in previous  
383 work (20, 21, 39) to permit individuals to wane from a state of multitypic immunity back to that of  
384 monotypic immunity subject to renewed hazard of symptomatic re-infection (*SI Appendix*). Using

385 this new modeling framework, we estimated a shared parameter across all provinces, which  
386 corresponded to the rate of waning multitypic immunity ( $\sigma$ ). No signature of waning multitypic  
387 immunity was observed across the time series as a whole; however, when we allowed  $\sigma$  to vary  
388 by year, we estimated a significant signature of waning multitypic immunity in 2019 and 2020 data  
389 only (Fig. 3E, *inset*). In general, incorporating  $\sigma$  improved model fits to the data when added both  
390 to the FOI-only model and the FOI model modified by age class (Table S8). Our best fit FOI  
391 model including both age modifications and time-varying multitypic waning immunity effectively  
392 recaptured the observed cumulative proportion of cases per age class per year at national (Fig.  
393 3E) and province (Fig. S17) levels. In general, cases accumulated more slowly across age  
394 classes with advancing years, tracking declining FOI.

395

### 396 **DENV genotyping in Kampong Speu province from 2019-2020 suggests a possible clade** 397 **replacement event in DENV-2.**

398 The high burden of pathogenic cases in older individuals in 2019 next led us to ask  
399 whether the virology of the DENV strains associated with the epidemic could play a role in driving  
400 observed patterns in the data. To address this question, we leveraged serum samples amassed  
401 during an active febrile surveillance study that we carried out in Kampong Speu province,  
402 adjacent to the Cambodian capital city of Phnom Penh, between July 2018 and December 2020  
403 (41, 42). In this study, we screened 760 samples collected from 697 unique individuals who  
404 reported to participating sites with fever during the study period, identifying 123 PCR-positive  
405 DENV infections. All patients reported within a self-identified window of five days since fever  
406 onset. From this data subset of positive DENV cases, we sequenced and published 122 whole  
407 DENV genomes (57 DENV-1, 61 DENV-2, and 4 DENV-4; Table S9), representing one-third of  
408 full genome DENV-1 sequences and over half of DENV-2 sequences currently available for  
409 Cambodia—thus emphasizing the considerable challenges faced in undertaking genomic  
410 epidemiology in resource-scarce settings (42). Maximum likelihood phylogenetic analysis of the  
411 resulting genomes demonstrated that most DENV-2 sequences recovered in 2019 and 2020  
412 belonged to the DENV-2 Cosmopolitan III lineage, the first record of this genotype reported in  
413 Cambodia, though its introduction has been reported recently in several other neighboring  
414 countries in SEA (55–58). All DENV-1 sequences clustered in the Genotype 1 lineage, consistent  
415 with previously reported genotype records in Cambodia (Fig. S18). In our study, sequences  
416 collected from 2019 were largely split between DENV-1 (N=52) and DENV-2 (N=35) serotypes  
417 (59.8% vs. 40.2% respectively), while sequences collected in 2020 were dominated by DENV-2  
418 (N=26/31, 83.9 %). In 2019 and 2020, respectively, 26/35 (74.3%) and 24/26 (92.3%) of DENV-2  
419 sequences belonged to the Cosmopolitan III lineage, with the remaining sequences clustering in  
420 the Asian-1 DENV-2 lineage previously reported in Cambodia.

421 We constructed serotype-specific Bayesian timetrees (59, 60) from DENV sequences to  
422 assess the divergence time of 2019-2020 lineages from sequences previously reported from  
423 Cambodia and from neighboring SEA countries across our 2002-2020 study period (Fig. 4; Table  
424 S9). The majority of DENV-1 lineages (detailed in Fig. S18) diverged relatively recently from 2015  
425 and 2016 Cambodian sequences last reported within this serotype (Fig. 4A), with a time to Most  
426 Recent Common Ancestor (tMRCA) of approximately 7.9 years (MRCA at February 2013, 95%  
427 HPD: July 2012 – September 2013). BLAST analysis indicated that this cluster of DENV-1  
428 Cambodia sequences demonstrated the highest identity to sequences recovered from China in  
429 2019, while another, rarer subset of DENV-1 sequences more closely resembled those recovered

430 from Thailand in 2019 and 2020 (61). By contrast, DENV-2 sequences in the Cosmopolitan III  
431 lineage demonstrated high divergence from previously reported sequences for Cambodia (which  
432 have been recorded only in the Asian-1 lineage), with a tMRCA of approximately 88.5 years  
433 (MRCA at 1932, 95% HPD: 1927-1937). BLAST analysis indicated that DENV-2 Cosmopolitan  
434 sequences recovered from Cambodia in 2019 and 2020 showed the highest similarity to  
435 sequences previously derived from recent DENV-2 Cosmopolitan outbreaks in Singapore,  
436 Malaysia, Sri Lanka, and Thailand (53, 57, 61). Locally, within our regional data subset for SEA,  
437 sequences tightly clustered in both geographic space and time were highly phylogenetically  
438 related (Fig. S19), consistent with previous studies emphasizing the importance of microscale  
439 transmission dynamics for DENV (36).

440  
441

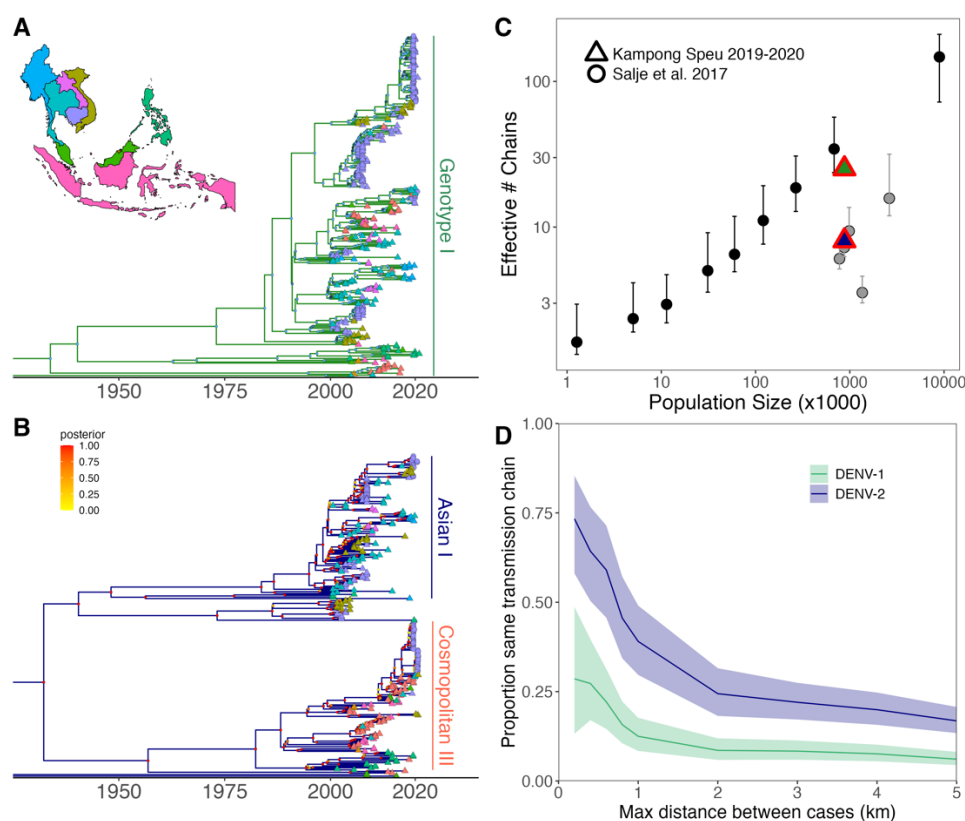

442  
443  
444  
445  
446  
447  
448  
449  
450  
451  
452  
453  
454  
455  
456  
457

**Figure 4. Bayesian time trees highlight geospatial structuring in evolutionary relationships for Cambodian dengue.** **A** Map of Southeast Asia with countries colored corresponding to sequences derived from each country, as shown in tip points on phylogenetic timetrees constructed using BEAST 2 for DENV-1 and **B** DENV-2. X-axis highlights divergence times between corresponding sequences. Reference sequences from GenBank are represented as triangle tips and sequences contributed by active febrile surveillance in this study as circles. Cambodia and corresponding sequences are shaded purple. Clade bars indicate the genotype of corresponding sequences within each serotype: genotype-1 for DENV-1 and Asian-1 and Cosmopolitan III for DENV-2. A detailed inset of geographic localities for 2019-2020 Cambodia sequences can be viewed in Fig. S19. **C** Number of effective transmission chains for circulating DENV estimated across populations of varying densities. Black (urban) and gray (rural) circles with corresponding 95% confidence intervals depict estimates for Thailand from Salje et al. 2017 (36), while triangles depict estimates from our Kampong Speu active febrile surveillance study for DENV-1 (green) and DENV-2 (blue). **D** Proportion of sequence pairs for Kampong Speu DENV-1 (green) and DENV-2 (blue) genomes which are derived from the same transmission chain (i.e. share a MRCA <6 months since the earlier sequence in the pair) across progressively longer Euclidean distances separating the localities from which the sequences were recovered.

458

459 Prior genomic analysis of geolocated DENV sequences in Thailand has demonstrated  
460 the importance of microscale, household-level transmission in driving DENV dynamics,  
461 particularly in the highly urbanized setting of Bangkok (36). In Bangkok, human population size  
462 was shown to be positively correlated with the number of distinct DENV transmission chains (a  
463 measure of phylogenetic diversity) circulating in the region (Fig. 4C). In more rural settings in  
464 Thailand, this relationship was less pronounced, but the authors predicted that patterns of  
465 increasing urbanization would drive DENV diversity to more closely approximate dynamics  
466 witnessed in Bangkok. We compared patterns in DENV genomic diversity captured in geolocated  
467 sequences from 2019 and 2020 in peri-urban Cambodia with those previously investigated in  
468 Thailand (Fig. 4C), building transmission chains from sequence pairs which shared a MRCA  
469 within the past six months. The number of transmission chains recovered for endemic DENV-1 in  
470 our study region closely matched that predicted by population size in urban Bangkok. For DENV-  
471 2, which showed less overall diversity than DENV-1, the lower number of transmission chains per  
472 population size better approximated that recovered from rural regions in Thailand, in keeping with  
473 a hypothesis of recent invasion (Fig. 4C). We further demonstrated a tighter coupling between  
474 phylogenetic relatedness and the physical, geographic distance between paired sequences for  
475 DENV-2 vs. DENV-1 sequences, consistent with epidemic invasion behavior and the tight  
476 clustering of cases in space and time (Fig. 4D).

477

#### 478 **Mechanistic simulations of clade replacement in an age-structured model captured** 479 **patterns qualitatively similar to those seen in the data.**

480 To consolidate findings from TSIR and FOI analysis with insights gleaned from genomic  
481 epidemiology in 2019-2020, we constructed a mechanistic, age-structured discrete time  
482 deterministic epidemic model in biweekly timesteps (*SI Appendix*) (62–64) to simulate two- and  
483 three-serotype dengue infections in a population demographically structured to mimic that of  
484 Cambodia over the past half-century. We initiated simulations incorporating seasonal variation in  
485 transmission as estimated by TSIR (Fig. 1) and annual variation in FOI corresponding to the time  
486 series of national estimates (Fig. 3), then modified dynamics to test hypotheses of potential  
487 drivers underlying the spike in cases and corresponding expansion in age structure witnessed in  
488 the three epidemics identified in the NDCP data (Fig. 5). As with our FOI analysis, we modeled  
489 secondary infections as reported cases, except when testing hypotheses of tertiary case  
490 detection or waning multitypic immunity and reinfection.

491 For simplicity, we focused our analysis on drivers of the 2019 epidemic, simulating  
492 scenarios by which 2-circulating serotype dynamics were interrupted by a climate-driven spike in  
493 FOI in the epidemic year (H1), a genotype invasion and clade-replacement event with waning  
494 immunity within the serotype (H2), or a third serotype invasion (H3), then compared these to a  
495 hypothesis of 3-serotype circulation and increasing detectability of tertiary infections through time  
496 (H4) (Fig. 5A). We found that all hypotheses could recover high overall caseloads in epidemic  
497 years (Fig. 5B), though climate-driven increase in FOI (H1) did little to alter the mean age or age  
498 distribution of infection beyond baseline (Fig. 5C). By contrast, H2, H3, and H4 all elevated the  
499 mean age of infection, expanded the age distribution of cases, and produced a more gradual  
500 proportional accumulation of cases by age (Fig. 5D), in keeping with patterns in the observed  
501 data. Impacts on the age distribution of cases were less extreme for our H4 simulations but could  
502 be easily modified by varying the rate of increase in the proportion of tertiary cases detected with

503 time, which we did not estimate from the data. To highlight the link between the underlying  
 504 simulated transmission dynamics and our prior inference from the observed data in Fig. 3, we  
 505 additionally fit our two-serotype catalytic FOI model with waning immunity to the simulated data  
 506 generated for each hypothesis. Using this approach, we successfully recovered the input FOI in  
 507 all simulations (Fig. S20), and the model structure estimated a signature of waning immunity for  
 508 H2 and H3 simulations, which produced simulated data that closely resembled the true data (e.g.  
 509 elevated mean age of infection and expansion of age distribution of cases in epidemic year).  
 510  
 511

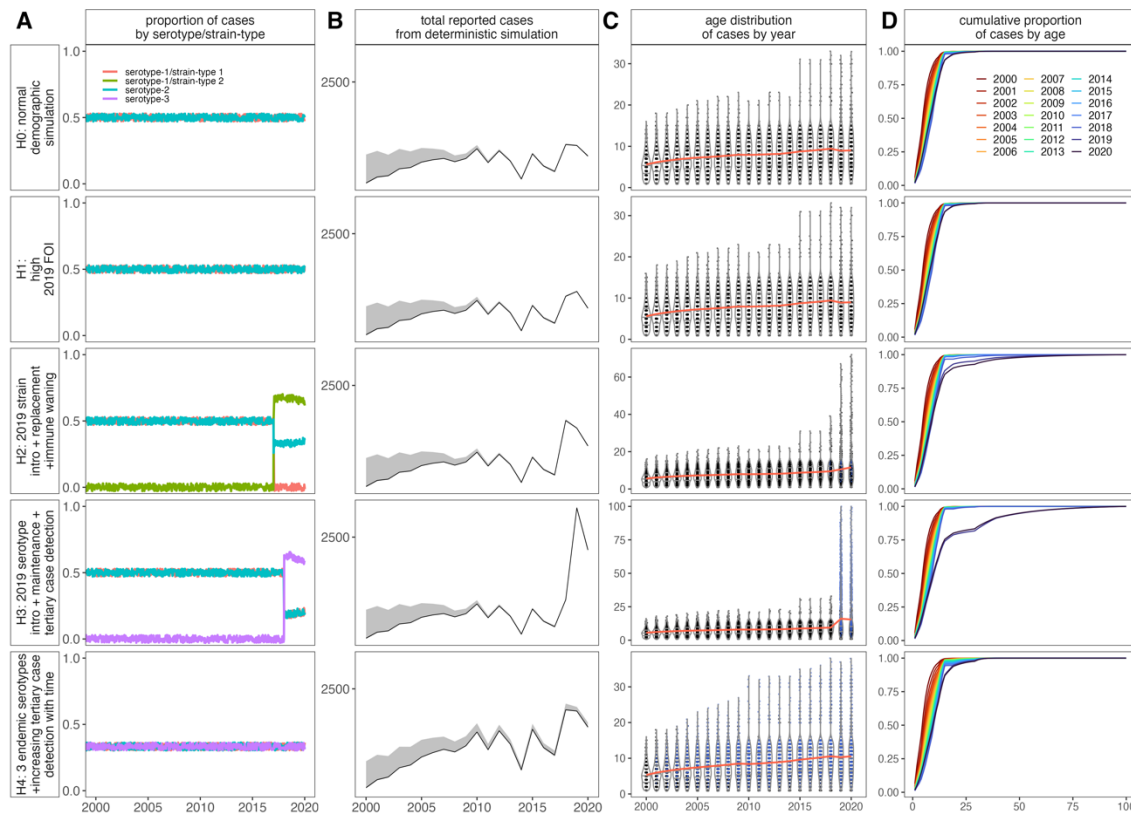

512  
 513 **Figure 5. Simulations of genotype or serotype introduction events recapitulate observed variation in the age**  
 514 **structure of dengue incidence from Cambodian data. A** Structure of deterministic simulation outlining hypotheses of  
 515 possible mechanisms underlying patterns in observed data for Cambodia: (H0) normal demographic simulation, (H1) 2-  
 516 circulating serotypes with a climate-driven FOI spike in epidemic year 2019, (H2) novel genotype invasion and clade  
 517 replacement with waning immunity in 2019, (H3) novel serotype invasion and 10% tertiary case detection in 2019, (H4) 3  
 518 endemic circulating serotypes and progressively increasing rates of tertiary case detection (from 0 to 100%) across time  
 519 series. **B** Total reported cases (solid line = mean FOI; translucent shading = 95% confidence interval for FOI), **C** age  
 520 distribution of cases by year (black = secondary; blue = tertiary), and **D** cumulative proportion of cases by age, by year  
 521 from each corresponding simulation.  
 522

523  
 524 Though we focused simulations on hypothesized drivers of the 2019 epidemic, we also  
 525 repeated analyses with H1, H2, and H3 alterations introduced in 2007 to highlight their  
 526 downstream impacts on the rest of the time series (Fig. S21). By definition, H4 did not define a  
 527 change in a specific year. High epidemic FOI (H1) simulations for 2007 recovered the same spike  
 528 in cases but had minimal impact on the age of infection, while both hypotheses of genotype  
 529 invasion and clade replacement with waning immunity (H2) and third serotype invasion (H3)

530 recovered a pattern consistent with the observed data: that of increasing mean and distribution of  
531 infection age concentrated around the epidemic year, which returned to baseline following the  
532 perturbation. Age increases were more extreme for H3, despite being suppressed by the  
533 increased overall FOI resulting from the introduction of a third serotype with equivalent FOI into  
534 the system. To date, no evidence of serotype invasion or turnover has been presented for the  
535 2019 Cambodian epidemic, though serotype exchange is thought to have played a role in the  
536 2007 epidemic (10, 14). Genotype invasion and clade replacement events within a serotype have  
537 been described in Cambodia in 2007 (13, 14) and 2019 (this paper).

538

## 539 **DISCUSSION**

540 Drawing from two decades of national surveillance data and a more recent genomic  
541 cohort study, we queried the mechanisms that underly dengue virus transmission and drive  
542 periodic dengue epidemics in Cambodia. All told, our study highlights the complex interplay of  
543 climate, demography, immunology, and virology that dictates the dynamics of dengue virus  
544 disease in endemic settings.

545 Our investigations of climate effects on dengue transmission in Cambodia mirror those  
546 previously reported in Thailand (25, 26), Sri Lanka (53), and China (49), emphasizing the role of  
547 temperature, and—to a lesser extent—precipitation, in synchronizing annual dynamics in  
548 epidemic years. Consistent with prior work that highlights a role for El Niño in driving multiannual  
549 dengue cycles in other systems (26, 27, 65, 66), we observed synchrony between reconstructed  
550 multiannual dengue cycles in Cambodia and the ONI; however, this synchrony appeared to peak  
551 during the robust 2015-2016 El Niño, which did not correspond to one of the three major dengue  
552 epidemic years in our dataset. The muted impact of El Niño on dengue dynamics in Cambodia  
553 could reflect an increased homogenization of caseloads at higher temperatures in more recent  
554 years (25)—which is likely to mask more subtle effects on transmission—or may also be a  
555 consequence of less pronounced latitudinal variation (and corresponding climate differences) in  
556 Cambodia, as compared to other countries where these phenomena have been studied (e.g.  
557 Thailand). Nonetheless, our analysis suggests that warmer temperatures do play a role in driving  
558 epidemic dynamics for Cambodian dengue, and likely contributed to high caseloads in 2019. As  
559 temperatures increase globally, dengue transmission is likely to accelerate, and variation in both  
560 the timing of annual dengue transmission and multiannual peaks in caseload may become more  
561 homogenous.

562 In addition to climate, our data and corresponding analysis emphasizes the importance of  
563 human demography and prior immunity in structuring dengue transmission globally. Consistent  
564 with studies conducted elsewhere (19–21), we observed a pattern of increasing mean age of  
565 dengue infection, which we effectively recaptured by modeling declining birth and death rates  
566 consistent with Cambodia's demographic transition. This changing demography yielded a  
567 declining force of infection for dengue through time, a pattern somewhat counterintuitive  
568 considering recent explosive epidemics. Nonetheless, the literature demonstrates how imperfect  
569 vaccination for childhood diseases, such as measles, combined with low birth rates, can similarly  
570 depress the FOI, leading to a build-up of older age susceptibles in the population that  
571 subsequently spawns a large outbreak, sometimes termed a 'honeymoon epidemic' (in reference  
572 to the period of relative latency following vaccination and preceding the increase in cases (67)).  
573 We here provide evidence for a similar phenomenon, based on the age of clinically apparent  
574 infections for dengue in Cambodia. Our study is unique from previous investigations in its

575 recognition—not only of escalation of the mean age of dengue infection—but also of the  
576 expanding age range of reported dengue disease. Indeed, infected individuals > 70 years in age  
577 during the 2019 epidemic are difficult to reconcile under assumptions by which reported cases  
578 correspond to symptomatic secondary infections only. In our modeling framework, we account for  
579 these infections by allowing for waning of multitypic immunity and repeated symptomatic  
580 infections in older age individuals. Recent analyses out of the Thailand system highlight a  
581 similarly surprising uptick in case reports among older individuals in more recent years (19),  
582 which the authors attribute to increased detectability in tertiary and quaternary infections with  
583 time. The authors offer a series of hypothetical explanations for increasing case detectability  
584 across their time series: that tertiary and quaternary dengue infections might be more pathogenic  
585 (and therefore more detectable) due to an abundance of comorbidities in older individuals, that  
586 immunopathology may be exacerbated in older patients who experienced longer durations  
587 between repeat infections; or that waning multitypic immunity could allow for repeat infections in  
588 the oldest age cohorts (our hypothesis). Our analyses in the Cambodia system are not mutually  
589 exclusive with any of these explanations; however, we hypothesize that, were comorbidities or  
590 immunopathogenesis in older individuals driving patterns in the observed data, we would expect  
591 to see an hour-glass shape in reported cases, with reduced reporting in middle-aged individuals  
592 who have progress beyond secondary exposures but are at lower risk for both comorbidities and  
593 immunopathology. Instead, we see a gradual tapering in the age-frequency of infection, which  
594 expands in range with time (Fig. S15), consistent with the hypothesis of waning multitypic  
595 immunity. This latter hypothesis, when considered in light of a genotype replacement event, can  
596 also explain isolated expansion in the age range of cases witnessed in conjunction with epidemic  
597 year 2007 and 2012 in our time series, while the first two hypotheses cannot.

598 Our deterministic model simulations demonstrate how this short-term (1–3 year) spikes in  
599 the age distribution of cases, independent of the mean annual trend in the time series, can be  
600 achieved both via introduction of a novel genotype with waning immunity or via introduction of a  
601 novel tertiary serotype into an endemic, two-serotype system (equally plausible would be  
602 introduction of a quaternary serotype into an endemic three-serotype system). Though limited in  
603 scope, PCR-based sentinel surveillance data provide no support for serotype turnover associated  
604 with the 2019 dengue epidemic in Cambodia (11). By contrast, genome sequencing data from our  
605 own febrile cohort study in Kampong Speu province offers support for a genotype replacement  
606 event. Recent analyses of the Thailand dengue system link transitions in serotype dominance  
607 and clade replacement of genotype sublineages within a single serotype to epidemic magnitude  
608 (35). This work suggests that large epidemics typically result from the invasion, expansion, and  
609 evolution of viral lineages that diverge from previously circulating lineages of the same serotype  
610 but are more closely related to co-circulating viruses of endemic heterotypic serotypes, reflecting  
611 the viral fitness advantage afforded by ADE (31). In Thailand, the most severe epidemics were  
612 linked to clade replacement of a resident viral genotype by an evolutionarily fitter DENV lineage  
613 within the same serotype, resulting in a ‘selective sweep’, which subsequently reduced overall  
614 viral diversity and, consequently, diminished between-serotype antigenic differences (35). In the  
615 2019 epidemic in Cambodia, the Cosmopolitan genotype introduction, followed by serotypic and  
616 genotypic homogeneity in 2020, are consistent with the dynamics of clade replacement within the  
617 DENV-2 serotype. Indeed, clade replacement dynamics have been previously witnessed in  
618 conjunction with epidemic outbreaks in Cambodia (13, 14) and elsewhere (53, 57, 68–70).  
619 Antigenic cartography (71) is nonetheless needed to address whether the invading Cosmopolitan



620 III DENV-2 genotype was, indeed, antigenically distinct from previously circulating Asian-1  
621 lineages and, potentially, more antigenically similar to endemic heterotypic viruses. Our febrile  
622 cohort was derived from an ongoing childhood cohort study (41), largely limiting the resulting  
623 sequence data to younger cases. Genotyped infections in the oldest-age (>70 years) individuals  
624 in the national time series would do much to illuminate these hypotheses and could provide even  
625 more insights if paired with serotyping prior to the 2019 epidemic.

626 Several published studies offer regional explanations for the global dengue phenomenon  
627 of 2019. Recent analyses from Brazil, for example, argue that a low FOI in 2017 and 2018  
628 resulting from new public health interventions and behavioral modifications implemented in the  
629 wake of the Zika virus epidemic, drove a resurgence in cases in 2019 and an expansion of  
630 specific lineages of DENV-1 and DENV-2 that had been circulating cryptically for much of the  
631 past decade (72). Independent work in the same region indicates that the DENV-2 lineage  
632 responsible for the Brazilian outbreak additionally caused a clade replacement event within the  
633 serotype (69). Reports from other 2019 dengue epidemics in Bhutan and Bangladesh point to  
634 increased monsoon activity coincident with mass movement of people for school and religious  
635 holidays as key drivers of the surge in South Asia (73, 74)—while others still highlight a role for  
636 reintroduction of previously extinct serotypes, combined with high rainfall and insecticide  
637 resistance in these same regions (75). Notably, these latter studies lack data on both host  
638 susceptibility and viral phylogenetics needed to query the hypotheses presented here. Dengue  
639 surged worldwide in 2019, though the factors driving this surge appear to be somewhat  
640 heterogenous across ecosystems. Nonetheless, our study lends support for the role of climate in  
641 synchronizing epidemic dynamics across landscapes; it is possible that optimal climate conditions  
642 may facilitate expansion of low prevalence lineages which possess an intrinsic fitness advantage  
643 (e.g. higher replication rate, shorter incubation period (76)) over resident genotypes, thus driving  
644 epidemics. Previous modeling studies have suggested that invading dengue lineages may  
645 circulate at low prevalence in a host population for many years prior to detection, expansion, and  
646 displacement of resident clades in the same serotype (77).

647 Here, we propose the novel introduction of the DENV-2 Cosmopolitan genotype, coupled  
648 with a subtle climate-driven increase in FOI, and overlaid on the background of an aging  
649 population with correspondingly aging multitypic immunity, as one possible explanation for  
650 Cambodia's largest recorded dengue epidemic to date. Our study emphasizes the extraordinary  
651 dearth of publicly available DENV sequence data for Southeast Asia; indeed, DENV is sequenced  
652 so infrequently in Cambodia that it is impossible to know whether 2019 truly marked the first year  
653 of DENV-2 Cosmopolitan introduction to the country, or simply the year of intensified expansion  
654 and consequential epidemic dynamics. More broadly, our work illustrates the importance of the  
655 combined forces of climate, demography, immunology, and virology in driving increasingly severe  
656 dengue epidemics. As the global burden of dengue continues to expand, ongoing serological and  
657 genomic surveillance is needed to improve epidemic forecasting in Southeast Asia and around  
658 the world.

659  
660

## 661 **METHODS**

662

663 *Ethics*

664 This study was approved by the National Ethics Committee on Human Research and the  
665 National Institutes of Health (NIH) Institutional Research Board. Written informed consent was  
666 obtained from the individual participant or the parent or guardian of the child participants enrolled  
667 in this study. This study was registered at [clinicaltrials.gov](https://clinicaltrials.gov) as NCT04034264 and NCT03534245.

#### 668 *Enrollment and sample collection*

670 Nursing staff at the Kampong Speu (KPS) Referral Hospital identified, consented,  
671 enrolled, and collected demographic data from study participants. Participants, aged 6 months to  
672 65 years of age, presented to the outpatient department with a documented fever of 38°C or  
673 greater in the previous 24 hours. Participants with clinical symptoms and signs consistent with  
674 dengue were first screened for infection using SD Bioline DengueDuo rapid tests for NS1 antigen,  
675 pan-dengue IgM and IgG. Sera was collected and processed as described elsewhere for RNA  
676 extraction, and confirmatory qRT-PCR testing for DENV-1 – 4 was performed for rapid-test  
677 positive participants (41).

#### 679 *Cambodia national dengue data*

680 We obtained a 2002-2020 time series of age-structured dengue cases reported at the  
681 national level from clinicosyndromic surveillance efforts administered by the National Dengue  
682 Control Program (NDCP) of the Cambodian Ministry of Health. Since inception of the national  
683 surveillance system in 2002, each Cambodian province reports cases on a monthly basis to the  
684 national authorities who compile these reports for public health use and reporting to the World  
685 Health Organization. The date of each case and the corresponding age and gender of each  
686 patient are reported, in addition to the province in which the case was diagnosed (25 total). We  
687 binned cases to every-two-week (biweekly) intervals for application to TSIR modeling and  
688 summarized by age class within each year for application to FOI models. We note that one  
689 province (Tboung Khmum) was created only recently, such that the corresponding time series  
690 spanned from 2016-2020. As a result, this province was eliminated from both TSIR and FOI  
691 analyses.

#### 693 *Spatially-resolved climate data*

694 Climate variables, including daily mean temperature (°C) and total daily precipitation  
695 (mm) from 2002 to 2019 were downloaded from the ERA5 Daily Aggregates dataset for each  
696 Cambodian province (N=25) using Google Earth Engine (78). Comparable data were not  
697 available for 2020. The spatial resolution for the ERA5 data set is approximately 31 km; however,  
698 we aggregated climate data to the size of each province using the Cambodia Administrative  
699 Boundaries Level 1 shapefile (79) during the extraction process, then computed the mean  
700 temperature (°C) and total precipitation (mm) over biweekly intervals, from January 1, 2002 to  
701 December 31, 2019, while accounting for leap years.

#### 703 *Climate analyses*

704 We first investigated the climate data to identify intra- and interannual trends and identify  
705 any years within the dataset that might be considered climatic anomalies. For both temperature  
706 and precipitation, we constructed two generalized additive models (GAMs) in the Gaussian  
707 family. The first GAMs incorporated a response variable of, respectively, biweekly mean

708 temperature or total precipitation, at the province level, across the time series, with a fixed  
709 predictor of the interaction of year (as a numeric) with province, a cyclic smoothing spline by  
710 biweek of year, and a random effect of province. As a result, each GAM fit 25 distinct slopes and  
711 25 distinct y-intercepts to the corresponding temperature or precipitation data to describe the  
712 interannual climate trend for each province, while controlling for intra-annual variation (Fig. S3-  
713 S4; Table S1). We next constructed two GAMs with the same response variables but  
714 incorporating predictor variables of year (a factor) as a random effect and a cyclic smoothing  
715 spline by biweek of year. These GAMs enabled us to identify specific years that significantly  
716 deviated from the mean climate trends (Fig. S5-6; Table S1). Finally, we reduced temperature  
717 and precipitation time series by province into z-scores by subtracting, respectively, the mean  
718 biweekly temperature and precipitation of the entire time series from each biweekly datapoint per  
719 province, then dividing by the standard deviation. We visualized z-scores to highlight years in  
720 which many provinces exhibited z-scores outside the 95% confidence intervals, representing a  
721 climate anomaly (Fig. S5-6).

722

### 723 *TSIR modeling*

724 We next fit time series Susceptible-Infected-Recovered models (45–47) to the province  
725 level time series for the three inter-epidemic periods (2002-2006, 2008-2011, and 2013-2018), in  
726 order to highlight the extent to which epidemic year case loads deviated from projections based  
727 on susceptible reconstruction by birth rates alone. The TSIR model leverages an input time series  
728 of case counts, births, and total population to estimate the susceptible population and disease  
729 transmission rate at intervals corresponding to the generation time of the pathogen in question  
730 (here, roughly two weeks (80)). Under TSIR assumptions, the transmission rate is held constant  
731 from year to year, though allowed to vary intra-annually to reflect seasonal dynamics. Using the R  
732 package tsiR (45), we fit the TSIR model individually to an input time series of biweekly dengue  
733 case counts by province. Because births were reported only annually at the national level for  
734 Cambodia (81), we divided these among biweeks of each year and scaled them spatially by the  
735 relative population size of each province. For each inter-epidemic period, we reconstructed the  
736 susceptible population from the regression of cumulative cases on cumulative births, using either  
737 a Gaussian or a linear regression, depending on which approach provided the better fit to each  
738 data subset, as summarized in Table S2. The new province, Tboung Khmum, was excluded from  
739 TSIR analysis because case reporting only began in this region in 2016. Provinces Ratanak Kiri  
740 and Mondul Kiri were additionally excluded, due to poor performance of regression models for  
741 susceptible reconstruction within each region (Table S2;  $R^2$  for 2007/2012/2019 data subsets for  
742 Ratanak Kiri: 0.24/0.54/0.36; and for Mondul Kiri: 0.15/0.20/0.51).

743 While fitting TSIR, we allowed the transmission rate ( $\beta$ ) to vary across 26 biweekly  
744 intervals in a single year and the homogeneity parameter ( $\alpha$ ) to vary with each model fit. Using  
745 the model trained on each inter-epidemic period, we first projected cases in the subsequent  
746 epidemic years (2007, 2012, 2019) while reconstructing the susceptible population from  
747 corresponding epidemic year births alone. This first exercise demonstrated the ineffectiveness  
748 with which simple TSIR assumptions were able to recover case counts reported from epidemic  
749 years; therefore, we next sought to quantify the increase in the assumed susceptible count  
750 needed to capture reported cases. Previously, Wagner et al. 2020 (22) demonstrated analytically  
751 that, under short time horizons, the susceptible population ( $S'$ ) in a two-strain DENV system, in

752 which a new secondary serotype invades a population previously dominated by a single endemic  
753 serotype, can be approximated by the equation:

754 
$$S' \approx S + \frac{R_1 \rho_2 N}{I_1} \approx S^* \left[ 1 + \frac{\rho_2 \gamma \beta}{\mu(\gamma + \mu)} \right]$$

755 in which  $S$  corresponds to individuals naïve to all prior infection, while  $R_1$  and  $I_1$  correspond to  
756 individuals recovered from or infected with the endemic strain only, and  $N$  and  $\rho_2$  respectively  
757 represent the total population size and the rate of exogenous importation of a new serotype.  $S^*$   
758 then corresponds to the steady-state value of the Susceptible population under assumptions of a  
759 single endemic serotype only, while  $\mu$ ,  $\gamma$ , and  $\beta$  encompass the rates of birth, death, and  
760 transmission of exogenous infections of the new serotype. Building on these assumptions, we  
761 first calculated the factorial increase in the reconstructed susceptible population needed to  
762 recover case counts for the three epidemic years.

763

#### 764 *Panel regression and climate-informed TSIR*

765 To evaluate whether consideration of epidemic-year climate factors could improve TSIR  
766 predictions of epidemic cases, we next followed previous work to explore the extent to which  
767 biweekly transmission was predicted by climate (53). Because dengue is a vector-borne disease,  
768 we hypothesized that transmission should be lagged from climate effects on the vector population  
769 and, correspondingly, first conducted cross correlation analysis to determine the optimal lag  
770 between the time series of biweekly mean temperature and total precipitation on transmission at  
771 the province level. In keeping with prior work for dengue (53), we considered only lag times of up  
772 to one year in which the climate predictor led the empirical transmission rate; however, we  
773 deviated from previous studies by allowing the optimal lag to vary by province and inter-epidemic  
774 period. We found that the optimal time lag between peak climate predictor and peak dengue  
775 transmission ranged from 0.5 to 5 months (1 – 11 biweeks) for temperature (median = 3.5  
776 months) and from 0.5 to 9 months (1 – 18 biweeks) for precipitation (median = 1 month),  
777 consistent with prior analyses from Sri Lanka (53) (Table S3).

778 Once optimal lags for temperature and precipitation were obtained, inspired by previous  
779 work (48, 49, 53, 82), we next constructed a suite of regression models, incorporating a response  
780 variable of the log of biweekly province level transmission with the corresponding predictors of  
781 optimally lagged biweekly mean temperature and total precipitation for the province in question.  
782 We constructed separate regressions for each inter-epidemic period (2002-2006, 2008-2011, and  
783 2013-2018) and tested the sensitivity of transmission to climate predictors using a standard linear  
784 regression, a linear regression for precipitation paired with a Brière function for temperature (53,  
785 83), and a GAM (Fig. S8-10; Table S4). We then used lagged temperature and precipitation  
786 corresponding to each epidemic year in each province to project climate-informed transmission  
787 rates for 2007, 2012, and 2019. Results were qualitatively similar across all regression structures;  
788 as such, we report only GAM-projected transmission rates here (*SI Appendix*). Using climate-  
789 informed transmission rates, we again simulated TSIR to recover epidemic year predictions of  
790 caseload at the province level, which we evaluated against projections by TSIR fitted to the inter-  
791 epidemic periods and incorporating a proportional increase in the susceptible population.  
792 Because climate-derived transmission rates still failed to recover epidemic year peaks, we  
793 allowed for yet another susceptible amplification term to determine the relative increase in the

794 susceptible population still needed to recover epidemic dynamics even after accounting for  
795 climate (Table S5).

796

### 797 *Wavelet analyses*

798 We next used wavelet decomposition in the R package ‘WaveletComp’ (54) to explore  
799 annual and multiannual periodicity in dengue epidemics and corresponding climate variables. We  
800 converted biweekly case totals by province from the 2002-2020 NDCP dataset into incidence  
801 rates per 100,000 population, then, as in previous work (25, 26), used a Morlet wavelet with  
802 nondimensional frequency ( $\omega = 6$ ) to extract, detrend, and reconstruct annual cycles in dengue  
803 incidence with a maximum period of two years (52 biweeks) and multiannual cycles with periods  
804 ranging from two to 20 years (Fig. 2AB). We additionally calculated the average wavelet power in  
805 each biweekly timestep for both annual and multiannual cycles per province (Fig. S11AB). Next,  
806 we investigated synchronicity in dengue incidence across space by computing the Pearson’s  
807 correlation coefficient ( $\rho$ ) between province pairs, using the annual raw incidence and the  
808 reconstructed annual and multiannual cycles. All results for annual cycles were qualitatively  
809 similar to those for the annual raw incidence and are, therefore, not reported here. For annual  
810 incidence, we computed  $\rho$  for each province pair combination in yearly timesteps, then calculated  
811 the annual average  $\rho$  for each focal province compared against all other provinces (Fig. 2C). For  
812 multiannual cycles, we computed  $\rho$  for all pairwise province combinations across a sliding 5-year  
813 window. As with annual incidence, we then calculated the average  $\rho$  for each focal province per  
814 year, compared against all other provinces. Because 5-year cycles overlapped,  $\rho$  was averaged  
815 over multiple overlapping comparisons for each pairwise combination for all but the first and last  
816 year in the time series (Fig. 2D). For another measure of synchronicity, we additionally computed  
817 the cross-wavelet power spectrum for all province pairs, using both annual incidence rates in  
818 yearly timesteps and multiannual reconstructed cycles in 5-year intervals. As with the Pearson’s  
819 correlation coefficient, we averaged the output of these analyses (here, significant values for  
820 cross-wavelet power) for each focal province, as compared with all other provinces, at the  
821 appropriate timestep (Fig. S11CD). Because patterns in synchronicity were most pronounced at  
822 the annual incidence scale, in order to identify statistical correlates of high synchronicity years  
823 and localities, we finally constructed a GAM with a response variable of  $\rho$ , as reported in Fig. 2C,  
824 a fixed predictor of the interaction of focal province and geographic distance to the province under  
825 comparison; smoothing predictors of biweekly mean temperature, total precipitation, and mean  
826 population size for the focal province; and a random effect of year (Fig. S12; Table S6).

827 Because this last analysis indicated some predictive role for climate in driving synchrony  
828 in dengue incidence, we next investigated coherence between case data and climate variables,  
829 as previously compiled for TSIR from 2002-2019 (Fig. S13). We first computed mean cross-  
830 wavelet power as a measure of synchrony between the biweekly time series of raw dengue  
831 incidence and mean temperature (Fig. S13A) and total precipitation (Fig. S13B) per province. We  
832 next calculated mean cross-wavelet power between reconstructed multiannual dengue cycles  
833 over a 5-year interval and the same two climate variables, again per province (Fig. S13CD).  
834 Finally, we reconstructed *monthly* multiannual dengue cycles for each province to compute  
835 average cross-wavelet power with the Oceanic Niño Index (ONI), a monthly time series that  
836 quantifies the intensity of the El Niño Southern Oscillation, which has been previously associated  
837 with dengue dynamics in SEA (Fig. S13E) (26, 27, 65, 66).

838 Lastly, we extracted the mean period from reconstructed multiannual dengue cycles by  
839 province and at the national level, to compare with publicly available demographic data (birth  
840 rates, death rates, population size (81)) that informed downstream analyses (Fig. S14). We  
841 ignored migration in all analyses, as the net Cambodian migration rate across the time series  
842 (which was consistently negative) corresponded to <0.5% of the total population (81).

843

#### 844 *Quantifying mean age of infection*

845 Our next analyses shifted the focus from climate to demographic drivers of dengue  
846 incidence. To this end, we first quantified the interannual trend in the mean age of DENV  
847 infection, by province, across our 2002-2020 time series. We fit a GAM with a response variable  
848 of age to a fixed predictor of the interaction of year and province, while also including a random  
849 effect of province, to allow both slope and y-intercept to vary by the locality over which the data  
850 were compiled. We visualized these interannual trends across the age distribution of cases by  
851 province (Fig. S15) and also summarized at the national level (Fig. 3AB; Table S7).

852

#### 853 *Force of Infection estimation*

854 We next used the age-stratified, province level surveillance data to estimate the annual  
855 FOI for DENV in Cambodia across the 19-year time series from 2002-2020. Methods for  
856 estimating FOI from age-stratified serological data for single-strain pathogens are well  
857 established (40, 84–87), and prior work has adapted these methods to account for the role of pre-  
858 existing heterotypic immunity in DENV infection (39) and modified them for application to age-  
859 structured incidence data, in lieu of serology (20). We applied the model developed by Ferguson  
860 et al. 1999 (39) and Cummings et al. 2009 (20) to age-structured incidence recovered from the  
861 NDCP data, at the province level, assuming reported cases to represent secondary infections and  
862 all individuals in the dataset to eventually experience exposure to multiple DENV serotypes  
863 across their lifetimes. We allowed for a unique FOI across each year in the time series but first  
864 assumed a constant FOI across all age cohorts within a single year. As in prior work, this method  
865 additionally supported the estimation of FOIs that predated our data time series, albeit with  
866 diminished confidence as compared to our data-associated years. Specifically, we estimated one  
867 FOI per year per province, in addition to a summary FOI at the national scale, for all years  
868 predating the start of the 2002 time series and corresponding to the year of birth for the oldest  
869 individual in the first year of the corresponding subset of the data (Fig. S16; Table S8). For the  
870 national data (and for Takeo province), this corresponded to a 40-year time series, dating back to  
871 1981, the birth year of the oldest individual (22 years) in the first year of the dataset (*SI Appendix*;  
872 Table S8). No FOIs were estimated for the Tboung Khmum province for which the NDCP only  
873 began reporting data in 2016. We estimated mean FOI per serotype under assumptions of two  
874 circulating dengue serotypes in the region. Because FOI was estimated as a serotype average,  
875 these estimates would be proportionally depressed if instead accounting for three or four  
876 circulating dengue serotypes in the system. To highlight links to demography, we plotted FOI  
877 estimates collectively in comparison to national reported birth and death rates in Fig. 3C (81).

878 After fixing FOI by province, we next followed prior work (20) to estimate FOI modifiers by  
879 age cohort, shared across all provinces and all years of the data. Because of the wide range in  
880 the age distribution of cases across the time series under consideration, we fit thirteen age-  
881 specific modifiers to the fixed FOI values, which we allowed to vary between the first and second  
882 decades of the dataset, such that 26 FOI-modification terms were estimated in total (Table S8).

883 Finally, after observing the extremely high age distribution of cases in the later years of the time  
884 series, we modified our previous model to allow for a rate of waning immunity from multitypic  
885 back to monotypic immunity ( $\sigma$ ), such that older individuals could experience renewed pathogenic  
886 infections likely to be reported in the data (*SI Appendix*). As with age-modification terms, we  
887 estimated waning multitypic immunity shared across all provinces and all years in the dataset  
888 after fixing FOI. Because little signal of waning multitypic immunity was evident across the entire  
889 time series, we next allowed  $\sigma$  to vary by year across the dataset. We compared fits of the FOI-  
890 only, FOI with age modification, FOI with waning multitypic immunity, and FOI with both age  
891 modification and waning multitypic immunity models to the data (Table S8), then simulated the  
892 resulting accumulation of cases with age from the best fit model at national (Fig. 3E) and province  
893 levels (Fig. S17).

894

#### 895 *Viral sequencing*

896 Metagenomic Next-Generation Sequencing (mNGS) was applied to serum samples  
897 collected from all patients reporting with symptoms in our febrile cohort study. Briefly, pathogen  
898 mNGS libraries were prepared from isolated pathogen RNA and converted to cDNA Illumina  
899 libraries using the NEBNext Ultra II DNA Library Prep Kit (E7645) according to manufacturer's  
900 instructions. Library size and concentration were determined using the 4150 TapeStation system,  
901 Agilent, and Qubit 4 Fluorometer, Invitrogen (for quantitation only). External RNA Controls  
902 Consortium collection, ERCC, ThermoFisher, were used as indicators of potential library  
903 preparation errors and for input RNA mass calculation. Samples were sequenced on a NovaSeq  
904 (Illumina) instrument and an iSeq100 (Illumina) instrument using 150 nucleotide paired-end  
905 sequencing. A water ("no template") control was included in each library preparation.

906 Raw fastq files were uploaded to the CZID portal, a cloud-based, open-source  
907 bioinformatics platform, to identify microbes from metagenomic data (<https://czid.org>) (88).  
908 Potential pathogens were distinguished from commensal flora and contaminating microbial  
909 sequences from the environment by establishing a z-score metric based on a background  
910 distribution derived from 16 non-templated "water-only" control libraries. Data were normalized to  
911 reads mapped per million input reads for each microbe at both species and genus levels. Taxa  
912 with z-score less than 1, base pair alignment less than 50 base pairs, NT log(1/e) less than 10  
913 and reads per million (rpm) less than 10 were removed from analysis. Microbial sequences from  
914 the samples are available for access in the National Center for Biotechnology Information (NCBI)  
915 Sequence Read Archive.

916

#### 917 *Construction of consensus genomes*

918 We attempted to construct full-genome DENV sequences from any samples which were  
919 confirmed to be DENV-positive by RT-qPCR and which generated at least one reliable contig  
920 mapping to any serotype of DENV in the CZID pipeline. To generate full genome consensus  
921 sequences, we ran the ARTIC network's Nextflow consensus genome pipeline (89), mapping  
922 each sequence to the closest GenBank accession number hit in the original mNGS run of CZID,  
923 using a cutoff of 5 reads per nucleotide site to make a consensus call (sites with <5 reads were  
924 called as "N"). Sequences were additionally run through the CZID integrated consensus genome  
925 pipeline, again mapping to the closest hit identified in GenBank from the original mNGS  
926 assembly. Resulting consensus sequences from both assembly pipelines were then aligned with  
927 reference sequences and visually examined in Geneious Prime. Raw reads from mNGS were

928 then mapped to each full genome contig in turn and examined manually to determine the correct  
929 call for each base pair.

930 Using these methods, we generated full or near-full genome sequences for 57 DENV-1,  
931 61 DENV-2, and 4 DENV-4 samples, representing 122 of the 123 DENV-positive patients  
932 identified in our dataset. All contributed genomes were >10,000 bps in length and had a  
933 maximum of 90 Ns (corresponding to <1% of the DENV genome). Resulting sequences were  
934 uploaded to NCBI as individual FASTA files (Table S9).

935

### 936 *Phylogenetic and phylogenetic analysis*

937 We supplemented our own Cambodia sequences with all other Cambodian sequences  
938 for DENV-1 and DENV-2 available in GenBank at the time of analysis, selecting all full or partial  
939 genome nucleotide sequences >10,000 bp in length up to a collection date of December 31, 2020  
940 (DENV-1: tax id 11053, 192 sequences, including 57 contributed by this study; DENV-2: tax id  
941 11060, 116 sequences, including 61 contributed by this study). We further supplemented these  
942 Cambodia sequences with genomes collected from other major Southeast Asian countries (nine),  
943 which were Laos, Myanmar, Malaysia, Thailand, Vietnam, Brunei, Indonesia, the Philippines, and  
944 Singapore. All countries were represented in both the DENV-1 and DENV-2 datasets. To avoid  
945 overrepresenting certain countries outside of Cambodia, we limited sequence selection to a  
946 maximum of three randomly selected genomes collected per year from each available year per  
947 country, beginning in 2002, the year in which we began our national time series.

948 After selection, sequences were aligned separately by serotype in the program MAFFT  
949 (90), and the best fit nucleotide substitution model for each set of data was evaluated in the  
950 program ModelTest-NG (91). For both DENV-1 and DENV-2, a GTR+I+G4 nucleotide was  
951 determined to offer the best fit to the data. Using this best fit nucleotide substitution model, we  
952 next built a Bayesian phylogenetic tree for each set of DENV genomes in the program BEAST 2  
953 (60). We incorporated the date of sample collection for each sequence (or the midpoint of the  
954 year of collection if the date was not reported), and, after Salje et al. 2017 (36), we specified a  
955 strict molecular clock at a rate of  $7.9 \times 10^{-4}$  s/s/y (92) and a Coalescent Bayesian skyline prior in  
956 our models. We ran Markov Chain Monte Carlo chains in BEAST 2 for 150 million iterations,  
957 logging results every 10,000 iterations. After chains completed, we removed the initial 10% of  
958 iterations as burn-in and evaluated parameter convergence in Tracer v1.6 (parameters were  
959 deemed to have converged at ESS values  $\geq 200$ ). We summarized resulting phylogenetic trees  
960 in TreeAnnotator and visualized summary trees in the R package ggtree (93) (Fig. 4AB; Fig.  
961 S19).

962 Finally, we computed a Maximum Likelihood phylogenetic tree to illustrate the  
963 phylogenetic placement of our new Cambodia sequences in relation to all previously described  
964 genotypes of DENV-1 and DENV-2. For this analysis, we included all Cambodian sequences of  
965 DENV-1 and DENV-2 available in NCBI, as well as a broadly representative subset of sequences  
966 within all known genotypes of DENV-1 (genotypes I, II, and III) and DENV-2 (genotypes Asian-I,  
967 Asian-II, Asian-American, American, Cosmopolitan I, Cosmopolitan II, and Cosmopolitan III). As  
968 with Bayesian timetrees, sequences were first aligned in MAFFT (90), and the best fit nucleotide  
969 substitution model was computed in ModelTest-NG (91). As before, we found that a GTR+I+G4  
970 best represented both sequence subsets; using this model, corresponding phylogenetic trees  
971 were then constructed in the program RAxML (94). Following best practices outlined in the  
972 RAxML-NG manual, 20 ML inferences were made on each original alignment and bootstrap



973 replicate trees were inferred using Felsenstein's method (95), with the MRE-based bootstrapping  
974 test applied after every 50 replicates (96). Resulting phylogenies were then visualized in ggtree  
975 (93) (Fig. S18).

976

#### 977 *Estimating transmission chains from sequence data*

978 Lastly, we followed methods outlined in Salje et al. 2017 (36) to calculate the proportion  
979 of sequences within each DENV serotype that could be attributed to the same transmission chain  
980 on our Bayesian timetrees, defined as having a most recent common ancestor within the past six  
981 months in the same season. The reciprocal of the proportion of sequences sharing a transmission  
982 chain corresponds to the effective number of transmission chains circulating in a given  
983 population. Thus, to compare our estimates of transmission chain density against those  
984 previously reported for Thailand (36), we computed the total effective number of transmission  
985 chains observed in our 2019-2020 sequence dataset, separately for DENV-1 and DENV-2, at the  
986 World Bank reported population density for Kampong Speu province (81) (Fig. 4C). We also  
987 compared the proportion of DENV-1 vs. DENV-2 sequences determined to share a transmission  
988 chain to the Euclidean distance separating the precise GPS coordinates of the collection points of  
989 each sequence pair (Fig. 4D).

990

#### 991 *Mechanistic modeling of age-structured dengue dynamics*

992 Finally, we constructed a mechanistic, age-structured discrete time deterministic  
993 epidemic model in biweekly timesteps (*SI Appendix*) (62–64) to simulate two- and three-serotype  
994 dengue infections in a population demographically structured to mimic that of Cambodia over the  
995 past half-century. Using publicly-available national data for Cambodian birth rates (1960-2020)  
996 (81), population age structure (1950-2020) (97), and age-specific mortality rates (1950-2020)  
997 (98), we simulated the dynamics of two or three circulating DENV serotypes out to endemic  
998 equilibrium, incorporating seasonal intra-annual variation in transmission as estimated from TSIR.  
999 We then introduced the annual national FOI from 1999-2020, as previously estimated by fitting  
1000 catalytic models to the NDCP data (Fig. 3) and tracked the corresponding increase in the mean  
1001 age of simulated dengue cases. We modified dynamics to test hypotheses of potential drivers  
1002 underlying the spike in cases and corresponding expansion in age structure witnessed in the  
1003 three epidemics identified in the NDCP data (Fig. 5). As highlighted in the 'Results' section, we  
1004 focused our analysis on drivers of the 2019 epidemic, simulating scenarios by which 2-circulating  
1005 serotype dynamics were interrupted by a climate-driven spike in FOI in the epidemic year (H1), a  
1006 genotype invasion and clade-replacement event with waning immunity within the serotype (H2),  
1007 or a third serotype invasion (H3), then compared these to a hypothesis of 3-serotype circulation  
1008 and increasing detectability of tertiary infections through time (H4) (Fig. 5A). To highlight the link  
1009 between the underlying dynamics and our prior inference from the observed data, as well as  
1010 check that our simulated dynamics recapitulated those witnessed in the actual data, we fit our  
1011 original Ferguson-Cummings two-serotype catalytic FOI model to the simulated data generated  
1012 from our mechanistic model for each hypothesis to recapture the input FOI (Fig. S20). Holding  
1013 FOI constant, we then estimated a time-varying signature of waning monotypic immunity for all  
1014 simulated time series (Fig. S20) and compared results. Finally, we repeated analyses with H1,  
1015 H2, and H3 alterations introduced in 2007 to highlight their downstream impacts on the rest of the  
1016 time series (Fig. S21).

1017

1018 **DATA AVAILABILITY**

1019 All genome sequence data from this study have been submitted to the NCBI Sequence  
1020 Read Archive under Bioproject ID PRJNA681566. Consensus DENV sequences are also  
1021 available in GenBank, under accession numbers reported in Table S9. All bioinformatics code for  
1022 the initial mNGS assembly is available at <https://github.com/chanzuckerberg/idseq-workflows> and  
1023 all wet lab bench protocols are updated at  
1024 [https://docs.google.com/document/d/1RtNQc1D4or\\_ys7OxCCBjh4SDIdy7Jal4IE7if8EkHgE/edit](https://docs.google.com/document/d/1RtNQc1D4or_ys7OxCCBjh4SDIdy7Jal4IE7if8EkHgE/edit).  
1025 Further information on how to use ½ reaction volumes and FastSelect® are available upon  
1026 request. Code for generation of consensus genomes is available from the Artic Network at  
1027 <https://artic.readthedocs.io/en/latest/>. Raw data and detailed instructions of all specific analyses  
1028 undertaken to produce the figures and results presented here are available in our open access  
1029 github repository at: <https://github.com/brooklabteam/cambodia-dengue-national>. All other  
1030 reasonable data requests can be made to authors directly.

1031

1032 **ACKNOWLEDGEMENTS**

1033

1034 This research is supported by the Division of Intramural Research at the National Institute  
1035 of Allergy and Infectious Diseases at the National Institutes of Health and the Bill and Melinda  
1036 Gates Foundation [grant numbers OPP1211806, OPP1211841]. We thank patients and families  
1037 of Kampong Speu District Referral Hospital who participated in this study. We thank members of  
1038 the National Dengue Control Program not listed in the author byline and the Provincial Health  
1039 Department of Kampong Speu province in Cambodia. We thank all the other employees at the  
1040 Chan Zuckerberg Biohub and Chan Zuckerberg Initiative not listed in the author byline. We thank  
1041 Brian Moyer and the NIAID Office of Cyberinfrastructure and Computational Biology (OCICB) for  
1042 their assistance in improving the cyberinfrastructure of our Cambodian field sites. This work was  
1043 completed with resources provided by the University of Chicago's Research Computing Center.

1044

1045

1046

1047

1048

1049

1050

1051

1052

1053

1054

1055

1056

1057

1058

1059

1060

1061

1062

## 1063 REFERENCES

- 1064 1. World Health Organization, Dengue and severe dengue. *WHO Fact Sheets* (2022).
- 1065 2. S. Bhatt, *et al.*, The global distribution and burden of dengue. *Nature* **496**, 504–507 (2013).
- 1066 3. A. B. Sabin, Research on dengue during World War II. *American Journal of Tropical*  
1067 *Medicine and Hygiene* **1**, 30–50 (1952).
- 1068 4. L. C. Katzelnick, *et al.*, Antibody-dependent enhancement of severe dengue disease in  
1069 humans. *Science (New York, N.Y.)* **932**, 929–932 (2017).
- 1070 5. L. C. Katzelnick, *et al.*, Zika virus infection enhances future risk of severe dengue disease.  
1071 *Science* **369**, 1123–1128 (2020).
- 1072 6. statista, Cambodia: Urbanization from 2010 to 2020.  
1073 <https://www.statista.com/statistics/455789/urbanization-in-cambodia/>. (2022).
- 1074 7. T. N. Peng, “Southeast Asia’s demographic situation, regional variations, and national  
1075 challenges” in D. Singh, M. Cook, Eds. (ISEAS Publishing, 2017), pp. 55–82.
- 1076 8. G. W. Jones, “The Population of Southeast Asia” (2013).
- 1077 9. Hahn, H., Chastel, C., Dengue in Cambodia in 1963. Nineteen laboratory-proved cases.  
1078 *American Journal of Tropical Medicine and Hygiene* **19**, 106–109 (1970).
- 1079 10. R. Huy, *et al.*, National dengue surveillance in Cambodia 1980–2008: epidemiological and  
1080 virological trends and the impact of vector control. *Bull. World Health Organ.* **88**, 650–657  
1081 (2010).
- 1082 11. C. Yek, *et al.*, National dengue surveillance, Cambodia 2002–2020. *Bull World Health Org*  
1083 **101**, 605–616 (2023).
- 1084 12. D. S. Burke, A. Nisalak, D. E. Johnson, A prospective study of dengue infections in Bangkok.  
1085 *The American Journal of Tropical Medicine and Hygiene* **38**, 172–180 (1988).
- 1086 13. V. Duong, *et al.*, Genetic diversity and lineage dynamic of dengue virus serotype 1 (DENV-  
1087 1) in Cambodia. *Infection, Genetics and Evolution* **15**, 59–68 (2013).
- 1088 14. O. O’Connor, *et al.*, Potential role of vector-mediated natural selection in dengue virus  
1089 genotype/lineage replacements in two epidemiologically contrasted settings. *Emerging*  
1090 *Microbes and Infections* **10**, 1346–1357 (2021).
- 1091 15. A. A. Lover, *et al.*, Spatial epidemiology and climatic predictors of paediatric dengue  
1092 infections captured via sentinel site surveillance, Phnom Penh Cambodia 2011-2012. *BMC*  
1093 *Public Health* **14** (2014).

- 1094 16. Y. Arima, M. Chiew, T. Matsui, Epidemiological update on the dengue situation in the  
1095 Western Pacific Region, 2012. *Western Pacific surveillance and response journal : WPSAR*  
1096 **6**, 82–89 (2015).
- 1097 17. S. Ly, *et al.*, Asymptomatic dengue virus infections, Cambodia, 2012–2013. *Emerging*  
1098 *Infectious Diseases* **25**, 1354–1362 (2019).
- 1099 18. S. Vong, *et al.*, Under-recognition and reporting of dengue in Cambodia: A capture-  
1100 recapture analysis of the National Dengue Surveillance System. *Epidemiology and Infection*  
1101 **140**, 491–499 (2012).
- 1102 19. A. T. Huang, *et al.*, Assessing the role of multiple mechanisms increasing the age of dengue  
1103 cases in Thailand. *Proc. Natl. Acad. Sci. U.S.A.* **119**, e2115790119 (2022).
- 1104 20. D. A. T. Cummings, *et al.*, The impact of the demographic transition on dengue in Thailand:  
1105 Insights from a statistical analysis and mathematical modeling. *PLoS Medicine* **6** (2009).
- 1106 21. L. C. Katzelnick, *et al.*, Dynamics and determinants of the force of infection of dengue virus  
1107 from 1994 to 2015 in Managua, Nicaragua. *Proceedings of the National Academy of*  
1108 *Sciences of the United States of America* **115**, 10762–10767 (2018).
- 1109 22. N. Ferguson, R. Anderson, S. Gupta, The effect of antibody-dependent enhancement on  
1110 the transmission dynamics and persistence of multiple-strain pathogens. *Proc. Natl. Acad.*  
1111 *Sci. U.S.A.* **96**, 790–794 (1999).
- 1112 23. S. I. Hay, *et al.*, Etiology of interepidemic periods of mosquito-borne disease. *Proc. Natl.*  
1113 *Acad. Sci. U.S.A.* **97**, 9335–9339 (2000).
- 1114 24. M. A. Johansson, D. A. T. Cummings, G. E. Glass, Multiyear climate variability and dengue—  
1115 El Niño Southern Oscillation, weather, and dengue incidence in Puerto Rico, Mexico, and  
1116 Thailand: A longitudinal data analysis. *PLoS Med* **6**, e1000168 (2009).
- 1117 25. B. García-Carreras, *et al.*, Periodic synchronisation of dengue epidemics in Thailand over  
1118 the last 5 decades driven by temperature and immunity. *PLoS Biol* **20**, e3001160 (2022).
- 1119 26. W. G. van Panhuis, *et al.*, Region-wide synchrony and traveling waves of dengue across  
1120 eight countries in Southeast Asia. *Proc. Natl. Acad. Sci. U.S.A.* **112**, 13069–13074 (2015).
- 1121 27. B. Cazelles, M. Chavez, A. J. McMichael, S. Hales, Nonstationary Influence of El Niño on the  
1122 Synchronous Dengue Epidemics in Thailand. *PLoS Med* **2**, e106 (2005).
- 1123 28. D. A. T. Cummings, *et al.*, Travelling waves in the occurrence of dengue haemorrhagic fever  
1124 in Thailand. *Nature* **427**, 344–347 (2004).
- 1125 29. J. H. Huber, M. L. Childs, J. M. Caldwell, E. A. Mordecai, Seasonal temperature variation  
1126 influences climate suitability for dengue, chikungunya, and Zika transmission. *PLoS Negl*  
1127 *Trop Dis* **12**, e0006451 (2018).

- 1128 30. E. A. Gould, S. Higgs, Impact of climate change and other factors on emerging arbovirus  
1129 diseases. *Transactions of the Royal Society of Tropical Medicine and Hygiene* **103**, 109–121  
1130 (2009).
- 1131 31. D. A. T. Cummings, I. B. Schwartz, L. Billings, L. B. Shaw, D. S. Burke, Dynamic effects of  
1132 antibody-dependent enhancement on the fitness of viruses. *Proceedings of the National  
1133 Academy of Sciences* **102**, 15259–15264 (2005).
- 1134 32. B. Adams, *et al.*, Cross-protective immunity can account for the alternating epidemic  
1135 pattern of dengue virus serotypes circulating in Bangkok. *Proceedings of the National  
1136 Academy of Sciences of the United States of America* **103**, 14234–9 (2006).
- 1137 33. K. L. McElroy, *et al.*, Endurance, refuge, and reemergence of dengue virus type 2, Puerto  
1138 Rico, 1986–2007. *Emerg. Infect. Dis.* **17**, 64–71 (2011).
- 1139 34. C. V. F. Carrington, J. E. Foster, O. G. Pybus, S. N. Bennett, E. C. Holmes, Invasion and  
1140 maintenance of Dengue virus type 2 and type 4 in the Americas. *Journal of Virology* **79**,  
1141 14680–14687 (2005).
- 1142 35. L. C. Katzelnick, *et al.*, Antigenic evolution of dengue viruses over 20 years. *Science* (2021).
- 1143 36. H. Salje, *et al.*, Dengue diversity across spatial and temporal scales: Local structure and the  
1144 effect of host population size. *Science (New York, N.Y.)* **355**, 1302–1306 (2017).
- 1145 37. J. P. Messina, *et al.*, The current and future global distribution and population at risk of  
1146 dengue. *Nature Microbiology* **4**, 1508–1515 (2019).
- 1147 38. L. Cattarino, I. Rodriguez-Barraquer, N. Imai, D. A. T. Cummings, N. M. Ferguson, Mapping  
1148 global variation in dengue transmission intensity. *Science Translational Medicine* **12**,  
1149 eaax4144 (2020).
- 1150 39. N. M. Ferguson, C. A. Donnelly, R. M. Anderson, Transmission dynamics and epidemiology  
1151 of dengue: insights from age-stratified sero-prevalence surveys. *Proceedings of the Royal  
1152 Society B* **354**, 757–768 (1999).
- 1153 40. Hugo. Muench, *Catalytic models in epidemiology*. (Harvard University Press, 1959).
- 1154 41. J. E. Manning, *et al.*, Development of inapparent dengue associated with increased  
1155 antibody levels to *Aedes aegypti* salivary proteins: A longitudinal dengue cohort in  
1156 Cambodia. *The Journal of Infectious Diseases* (2021) <https://doi.org/10.1093/infdis/jiab541>.
- 1157 42. J. A. Bohl, *et al.*, Discovering disease-causing pathogens in resource-scarce Southeast Asia  
1158 using a global metagenomic pathogen monitoring system. *Proceedings of the National  
1159 Academy of Sciences* **119**, e2115285119 (2022).
- 1160 43. S. N. Wood, mgcv: GAMs and Generalized Ridge Regression for R. *R News* **1/2**, 20–24  
1161 (2001).

- 1162 44. NOAA: National Weather Service *Climate Prediction Center: Cold & Warm Episodes by*  
1163 *Season* (2023).
- 1164 45. A. D. Becker, B. T. Grenfell, TSIR: An R package for time-series susceptible-infected-  
1165 recovered models of epidemics. *PLoS ONE* **12**, 1–10 (2017).
- 1166 46. O. N. Bjornstad, B. F. Finkenstadt, B. T. Grenfell, Dynamics of measles epidemics:  
1167 Estimating scaling of transmission rates using a times series SIR model. *Ecological*  
1168 *Monographs* **72**, 169–184 (2002).
- 1169 47. B. T. Grenfell, O. N. Bjornstad, B. F. Finkenstadt, Dynamics of measles epidemics: Scaling  
1170 noise, determinism, and predictability with the TSIR Model. *Ecological Monographs* **72**,  
1171 185–202 (2002).
- 1172 48. R. E. Baker, A. S. Mahmud, C. J. E. Metcalf, Dynamic response of airborne infections to  
1173 climate change: predictions for varicella. *Climatic Change* **148**, 547–560 (2018).
- 1174 49. R. J. Oidtman, *et al.*, Inter-annual variation in seasonal dengue epidemics driven by  
1175 multiple interacting factors in Guangzhou, China. *Nature Communications* **10** (2019).
- 1176 50. N. A. Rehman, *et al.*, Quantifying the localized relationship between vector containment  
1177 activities and dengue incidence in a real-world setting: A spatial and time series modelling  
1178 analysis based on geo-located data from Pakistan. *PLoS Neglected Tropical Diseases* **14**, 1–  
1179 22 (2020).
- 1180 51. M. U. G. Kraemer, *et al.*, Big city, small world: density, contact rates, and transmission of  
1181 dengue across Pakistan. *J. R. Soc. Interface.* **12**, 20150468 (2015).
- 1182 52. M. U. G. Kraemer, *et al.*, Inferences about spatiotemporal variation in dengue virus  
1183 transmission are sensitive to assumptions about human mobility: a case study using  
1184 geolocated tweets from Lahore, Pakistan. *EPJ Data Science* **7** (2018).
- 1185 53. C. E. Wagner, *et al.*, Climatological, virological and sociological drivers of current and  
1186 projected dengue fever outbreak dynamics in Sri Lanka. *Journal of the Royal Society*  
1187 *Interface* **17** (2020).
- 1188 54. Roesch, Angi, Schmidbauer, Harald, WaveletComp: Computational Wavelet Analysis. R  
1189 package version 1.1. (2018).
- 1190 55. J. Phadungsombat, *et al.*, Emergence of genotype cosmopolitan of dengue virus type 2 and  
1191 genotype III of dengue virus type 3 in Thailand. *PLoS ONE* **13**, 1–26 (2018).
- 1192 56. V. T. Tran, *et al.*, Reemergence of Cosmopolitan genotype dengue virus serotype 2,  
1193 southern Vietnam. *Emerg. Infect. Dis.* **29** (2023).
- 1194 57. A. Wijewickrama, *et al.*, Emergence of a Dengue virus serotype 2 causing the largest ever  
1195 dengue epidemic in Sri Lanka. *bioRxiv* (2018) <https://doi.org/10.1101/329318>.

- 1196 58. H. A. Tissera, *et al.*, Severe dengue epidemic, Sri Lanka, 2017. *Emerg. Infect. Dis.* **26**, 682–  
1197 691 (2020).
- 1198 59. A. J. Drummond, M. A. Suchard, D. Xie, A. Rambaut, Bayesian phylogenetics with BEAUti  
1199 and the BEAST 1.7. *Molecular Biology and Evolution* **29**, 1969–1973 (2012).
- 1200 60. R. Bouckaert, *et al.*, BEAST 2: A software platform for Bayesian evolutionary analysis. *PLoS*  
1201 *Computational Biology* **10** (2014).
- 1202 61. K. Poltep, *et al.*, Genetic diversity of dengue virus in clinical specimens from Bangkok,  
1203 Thailand, during 2018–2020: Co-circulation of all four serotypes with multiple genotypes  
1204 and/or clades. *Tropical Medicine and Infectious Disease* **6** (2021).
- 1205 62. P. Klepac, H. Caswell, The stage-structured epidemic: Linking disease and demography with  
1206 a multi-state matrix approach model. *Theoretical Ecology* **4**, 301–319 (2011).
- 1207 63. C. J. E. Metcalf, *et al.*, Structured models of infectious disease: Inference with discrete  
1208 data. *Theoretical Population Biology* **82**, 275–282 (2012).
- 1209 64. P. Klepac, *et al.*, Stage-structured transmission of phocine distemper virus in the Dutch  
1210 2002 outbreak. *Proceedings. Biological sciences / The Royal Society* **276**, 2469–2476  
1211 (2009).
- 1212 65. M. Tipayamongkhogul, C.-T. Fang, S. Klinchan, C.-M. Liu, C.-C. King, Effects of the El Niño-  
1213 Southern Oscillation on dengue epidemics in Thailand, 1996-2005. *BMC Public Health* **9**,  
1214 422 (2009).
- 1215 66. A. Gagnon, A. Bush, K. Smoyer-Tomic, Dengue epidemics and the El Niño Southern  
1216 Oscillation. *Clim. Res.* **19**, 35–43 (2001).
- 1217 67. a R. McLean, R. M. Anderson, Measles in developing countries. Part II. The predicted  
1218 impact of mass vaccination. *Epidemiology and Infection* **100**, 419–442 (1988).
- 1219 68. L. Lambrechts, *et al.*, Dengue-1 virus clade replacement in Thailand associated with  
1220 enhanced mosquito transmission. *Journal of Virology* **86**, 1853–1861 (2012).
- 1221 69. J. G. de Jesus, *et al.*, Genomic detection of a virus lineage replacement event of dengue  
1222 virus serotype 2 in Brazil, 2019. *Memorias do Instituto Oswaldo Cruz* **115** (2020).
- 1223 70. K. Suzuki, *et al.*, Genotype replacement of dengue virus type 3 and clade replacement of  
1224 dengue virus type 2 genotype Cosmopolitan in Dhaka, Bangladesh in 2017. *Infection,  
1225 Genetics and Evolution* **75** (2019).
- 1226 71. L. C. Katzelnick, *et al.*, Dengue viruses cluster antigenically but not as discrete serotypes.  
1227 *Science* **349**, 1338–1343 (2015).
- 1228 72. A. F. Brito, *et al.*, Lying in wait: the resurgence of dengue virus after the Zika epidemic in  
1229 Brazil. *Nature Communications* **12**, 1–13 (2021).

- 1230 73. T. Tsheten, *et al.*, Epidemiological analysis of the 2019 Dengue epidemic in Bhutan.  
1231 *International Journal of Environmental Research and Public Health* **18**, 1–13 (2021).
- 1232 74. M. S. Hossain, *et al.*, Dengue in a crowded megacity: Lessons learnt from 2019 outbreak in  
1233 Dhaka, Bangladesh. *PLoS Neglected Tropical Diseases* **14**, 1–5 (2020).
- 1234 75. A. Ahsan, N. Haider, R. Kock, C. Benfield, Possible drivers of the 2019 Dengue outbreak in  
1235 Bangladesh: the need for a robust community-level surveillance system. *Journal of Medical*  
1236 *Entomology* **58**, 37–39 (2021).
- 1237 76. R. Rico-Hesse, *et al.*, Origins of Dengue type 2 viruses associated with increased  
1238 pathogenicity in the Americas. *Virology* **230**, 244–251 (1997).
- 1239 77. J. Lourenço, M. Recker, Viral and epidemiological determinants of the invasion dynamics of  
1240 Novel Dengue Genotypes. *PLoS Neglected Tropical Diseases* **4** (2010).
- 1241 78. Copernicus Climate Change Service Climate Data Store (CDS): Copernicus Climate Change  
1242 Service (C3S), ERA5: Fifth generation of ECMWF atmospheric reanalyses of the global  
1243 climate. (2017) (March 1, 2023).
- 1244 79. AmeriGEOSS Community Platform DataHub., Cambodia Admin Boundaries Level 1 (2023).
- 1245 80. H. Salje, *et al.*, Reconstructing unseen transmission events to infer dengue dynamics from  
1246 viral sequences. *Nature Communications*, 1–10 (2021).
- 1247 81. World Bank, Cambodia. *World Development Indicators* (2021) (April 12, 2022).
- 1248 82. R. E. Baker, *et al.*, Epidemic dynamics of respiratory syncytial virus in current and future  
1249 climates. *Nat Commun* **10**, 5512 (2019).
- 1250 83. E. A. Mordecai, *et al.*, Detecting the impact of temperature on transmission of Zika,  
1251 dengue, and chikungunya using mechanistic models. *PLoS Negl Trop Dis* **11**, e0005568  
1252 (2017).
- 1253 84. B. T. Grenfell, R. M. Anderson, The estimation of age-related rates of infection from case  
1254 notifications and serological data. *The Journal of Hygiene* **95**, 419–36 (1985).
- 1255 85. L. W. Pomeroy, *et al.*, Serotype-specific transmission and waning immunity of endemic  
1256 foot-and-mouth disease virus in Cameroon. *PLoS ONE* **10**, 1–16 (2015).
- 1257 86. G. H. Long, *et al.*, Identifying the age cohort responsible for transmission in a natural  
1258 outbreak of *Bordetella bronchiseptica*. *PLoS Pathogens* **6** (2010).
- 1259 87. D. M. Heisey, D. O. Joly, F. Messier, The fitting of general force-of-infection models to  
1260 wildlife disease prevalence data. *Ecology* **87**, 2356–2365 (2006).
- 1261 88. K. L. Kalantar, *et al.*, IDseq-An open source cloud-based pipeline and analysis service for  
1262 metagenomic pathogen detection and monitoring. *GigaScience* **9**, 1–14 (2021).



- 1263 89. ARTIC-network, The ARTIC field bioinformatics pipeline (2021) (July 10, 2021).
- 1264 90. K. Katoh, J. Rozewicki, K. D. Yamada, MAFFT online service: Multiple sequence alignment,  
1265 interactive sequence choice and visualization. *Briefings in Bioinformatics* **20**, 1160–1166  
1266 (2018).
- 1267 91. Di. Darriba, *et al.*, ModelTest-NG: A new and scalable tool for the selection of DNA and  
1268 protein evolutionary models. *Molecular Biology and Evolution* **37**, 291–294 (2020).
- 1269 92. A. A. Sall, *et al.*, Yellow fever virus exhibits slower evolutionary dynamics than dengue  
1270 virus. *Journal of Virology* **84**, 765–772 (2010).
- 1271 93. G. Yu, D. K. Smith, H. Zhu, Y. Guan, T. T. Y. Lam, Ggtree: an R Package for visualization and  
1272 annotation of phylogenetic trees with their covariates and other associated data. *Methods*  
1273 *in Ecology and Evolution* **8**, 28–36 (2017).
- 1274 94. A. M. Kozlov, D. Darriba, T. Flouri, B. Morel, A. Stamatakis, RAxML-NG: A fast, scalable and  
1275 user-friendly tool for maximum likelihood phylogenetic inference. *Bioinformatics* **35**,  
1276 4453–4455 (2019).
- 1277 95. J. Felsenstein, Confidence limits on phylogenies: An approach using the bootstrap.  
1278 *Evolution* **39**, 783–791 (1985).
- 1279 96. N. D. Pattengale, M. Alipour, O. R. P. Bininda-Emonds, B. M. E. Moret, A. Stamatakis, How  
1280 many bootstrap replicates are necessary? *Journal of Computational Biology* **17**, 337–354  
1281 (2010).
- 1282 97. United Nations, United Nations Department of Economic and Social Affairs: Population by  
1283 Age Groups—Both Sexes. (2022).
- 1284 98. United Nations, United Nations Department of Economic and Social Affairs: Deaths by  
1285 Single Age - Both Sexes. (2022).
- 1286
